# Supplementary material for: Some limitations of an approach to the assembly of bryostatins by ring-closing metathesis
Source: Royal Society of Chemistry journal article supplement (doi:10.1039/c7ob00079k), 2017-01-01

## **Some limitations of an approach to the assembly of bryostatins by ring-closing metathesis**

Raphaël Dumeunier, Thomas Gregson, Somhairle MacCormick, Hiroki Omori and Eric J. Thomas\*

### **Supplementary data**

Copies of  $^1\text{H}$  and  $^{13}\text{C}$  NMR spectra of some key compounds –in numerical order

rd107  
STANDARD IN OBSERVE

Automation directory: /data/nmrdata/Jan26  
File : 0703

Pulse Sequence: zgpg30

Solvent: CDCl<sub>3</sub>

Date: Jan 26 2005

Sample #7

File: 0703

INSTR: 300 "recpy"

Relax. delay 1.000 sec

Pulse 45.0 degrees

Acq. time 3.744 sec

Width 4797.6 Hz

16 repetitions

OBSERVE M1, 299.8459062 MHz

DATA PROCESSING

FT size 65536

Total time 1 min, 16 sec

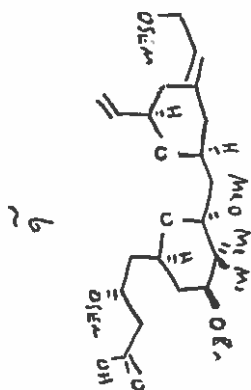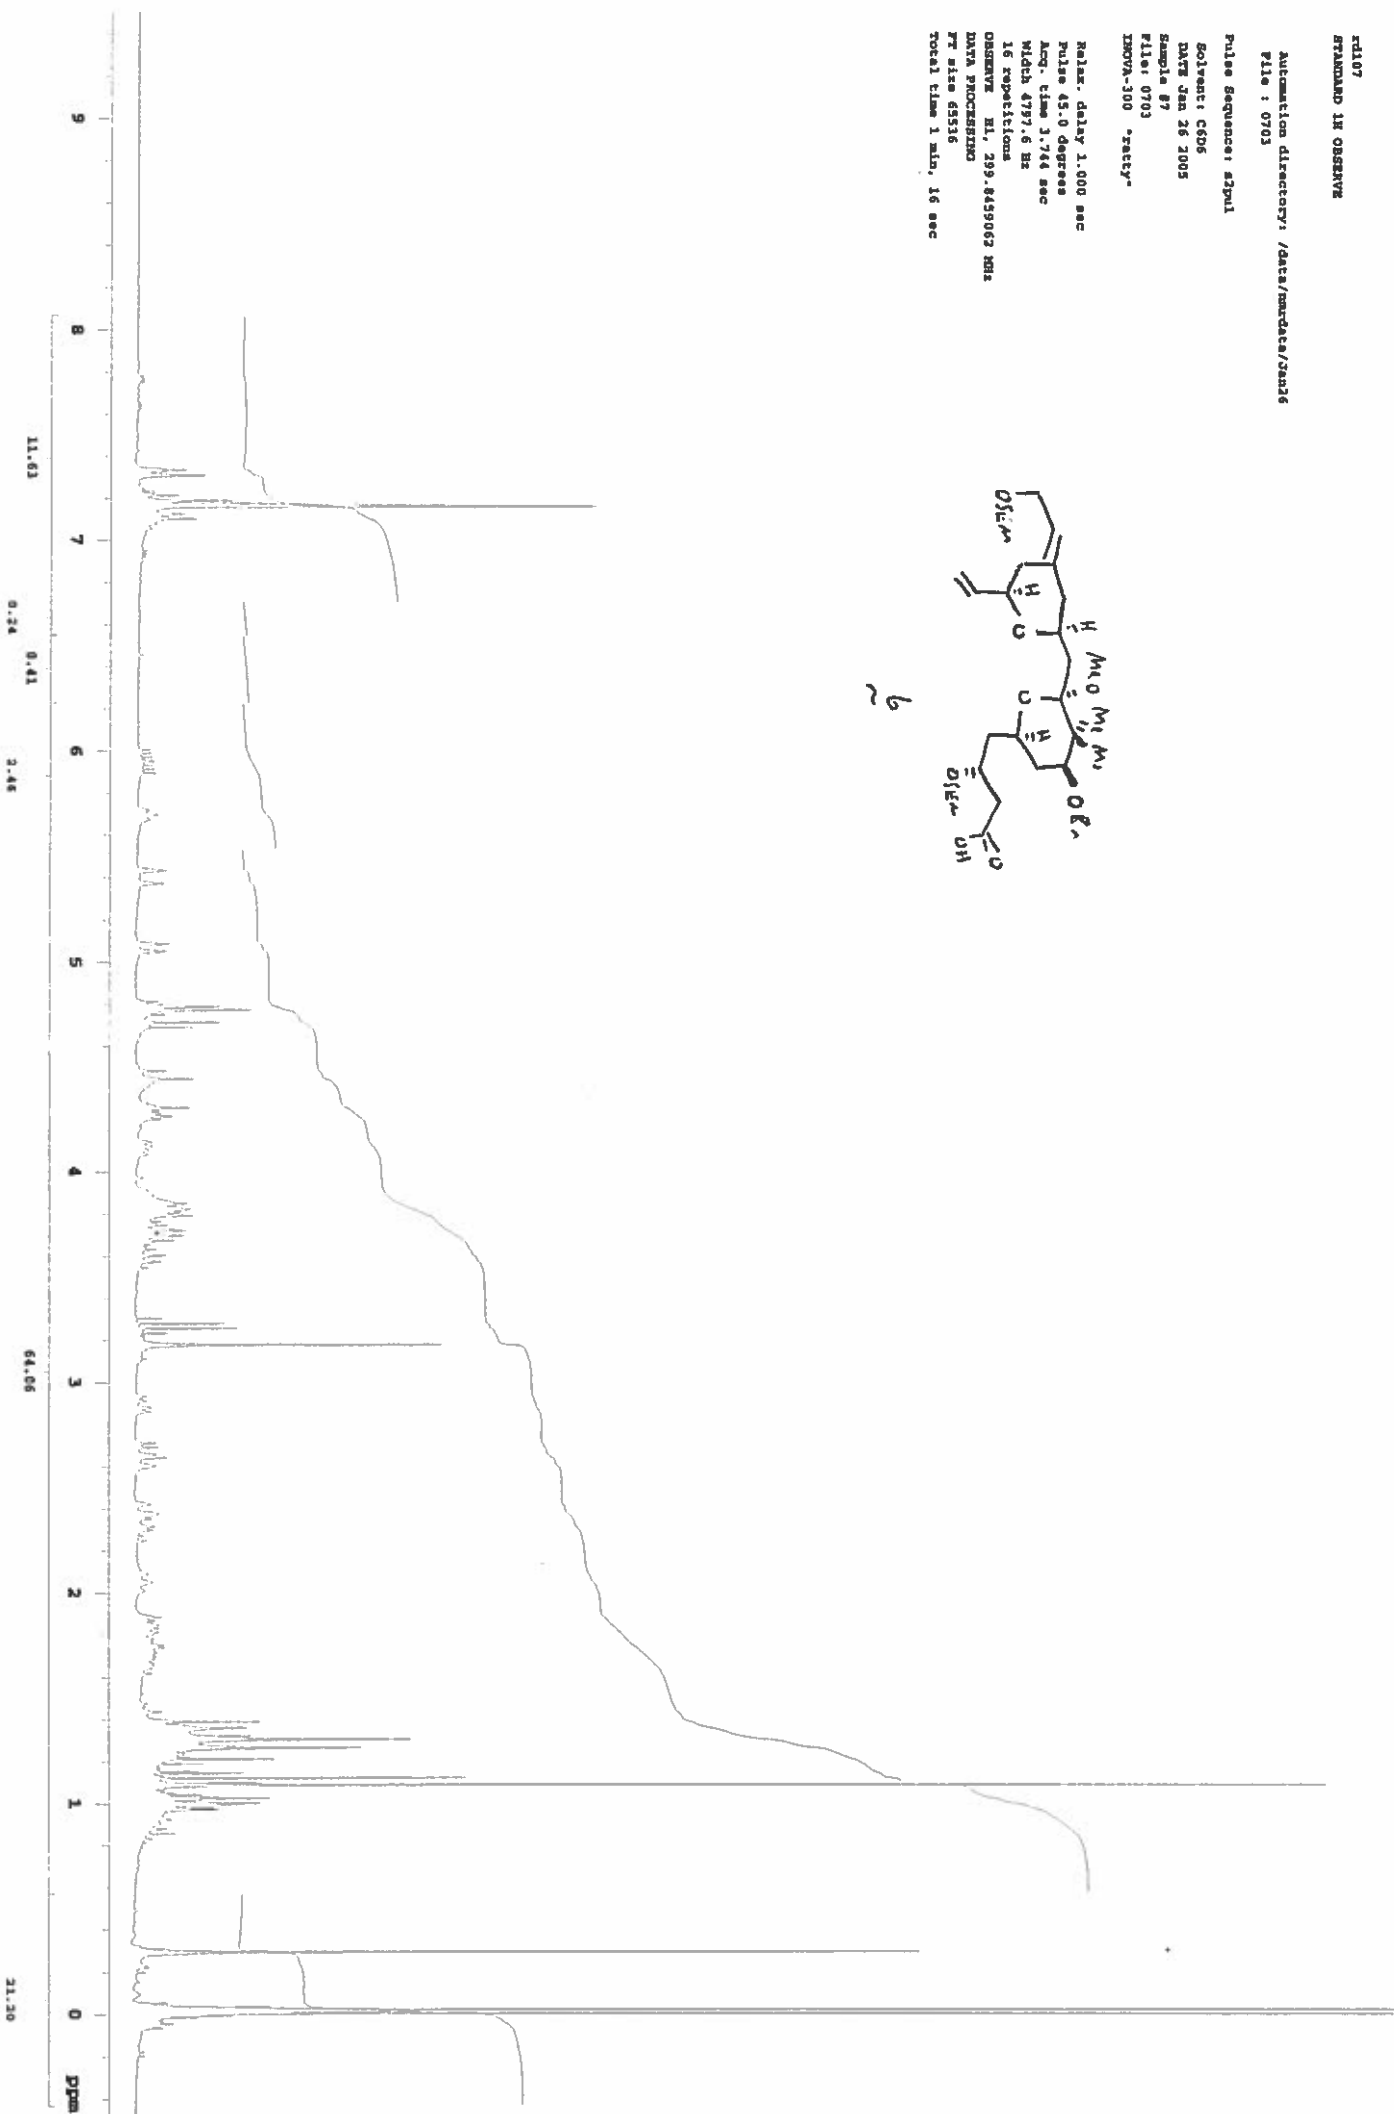

868  
STANDARD IN OBSERVE

Automation directory: /data/rmr/data/Mar09  
File : 2102

Pulse Sequence: zgpg30  
Solvent: cdcl3  
Ambient temperature  
Sample 821  
P1: 2102  
INNOVA-300 "ratty"

Relax. delay 1.000 sec  
Pulse 45.0 degrees  
Acq. time 3.744 sec  
Width 4797.6 Hz  
16 repetitions  
OBSERVE H1, 299.8458792 MHz  
DATA PROCESSING  
F1 size 65536  
Total time 1 min, 16 sec

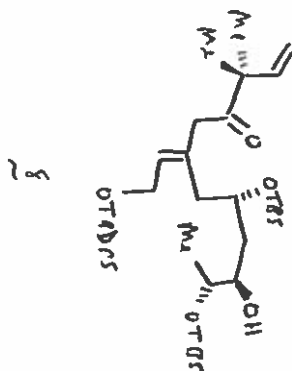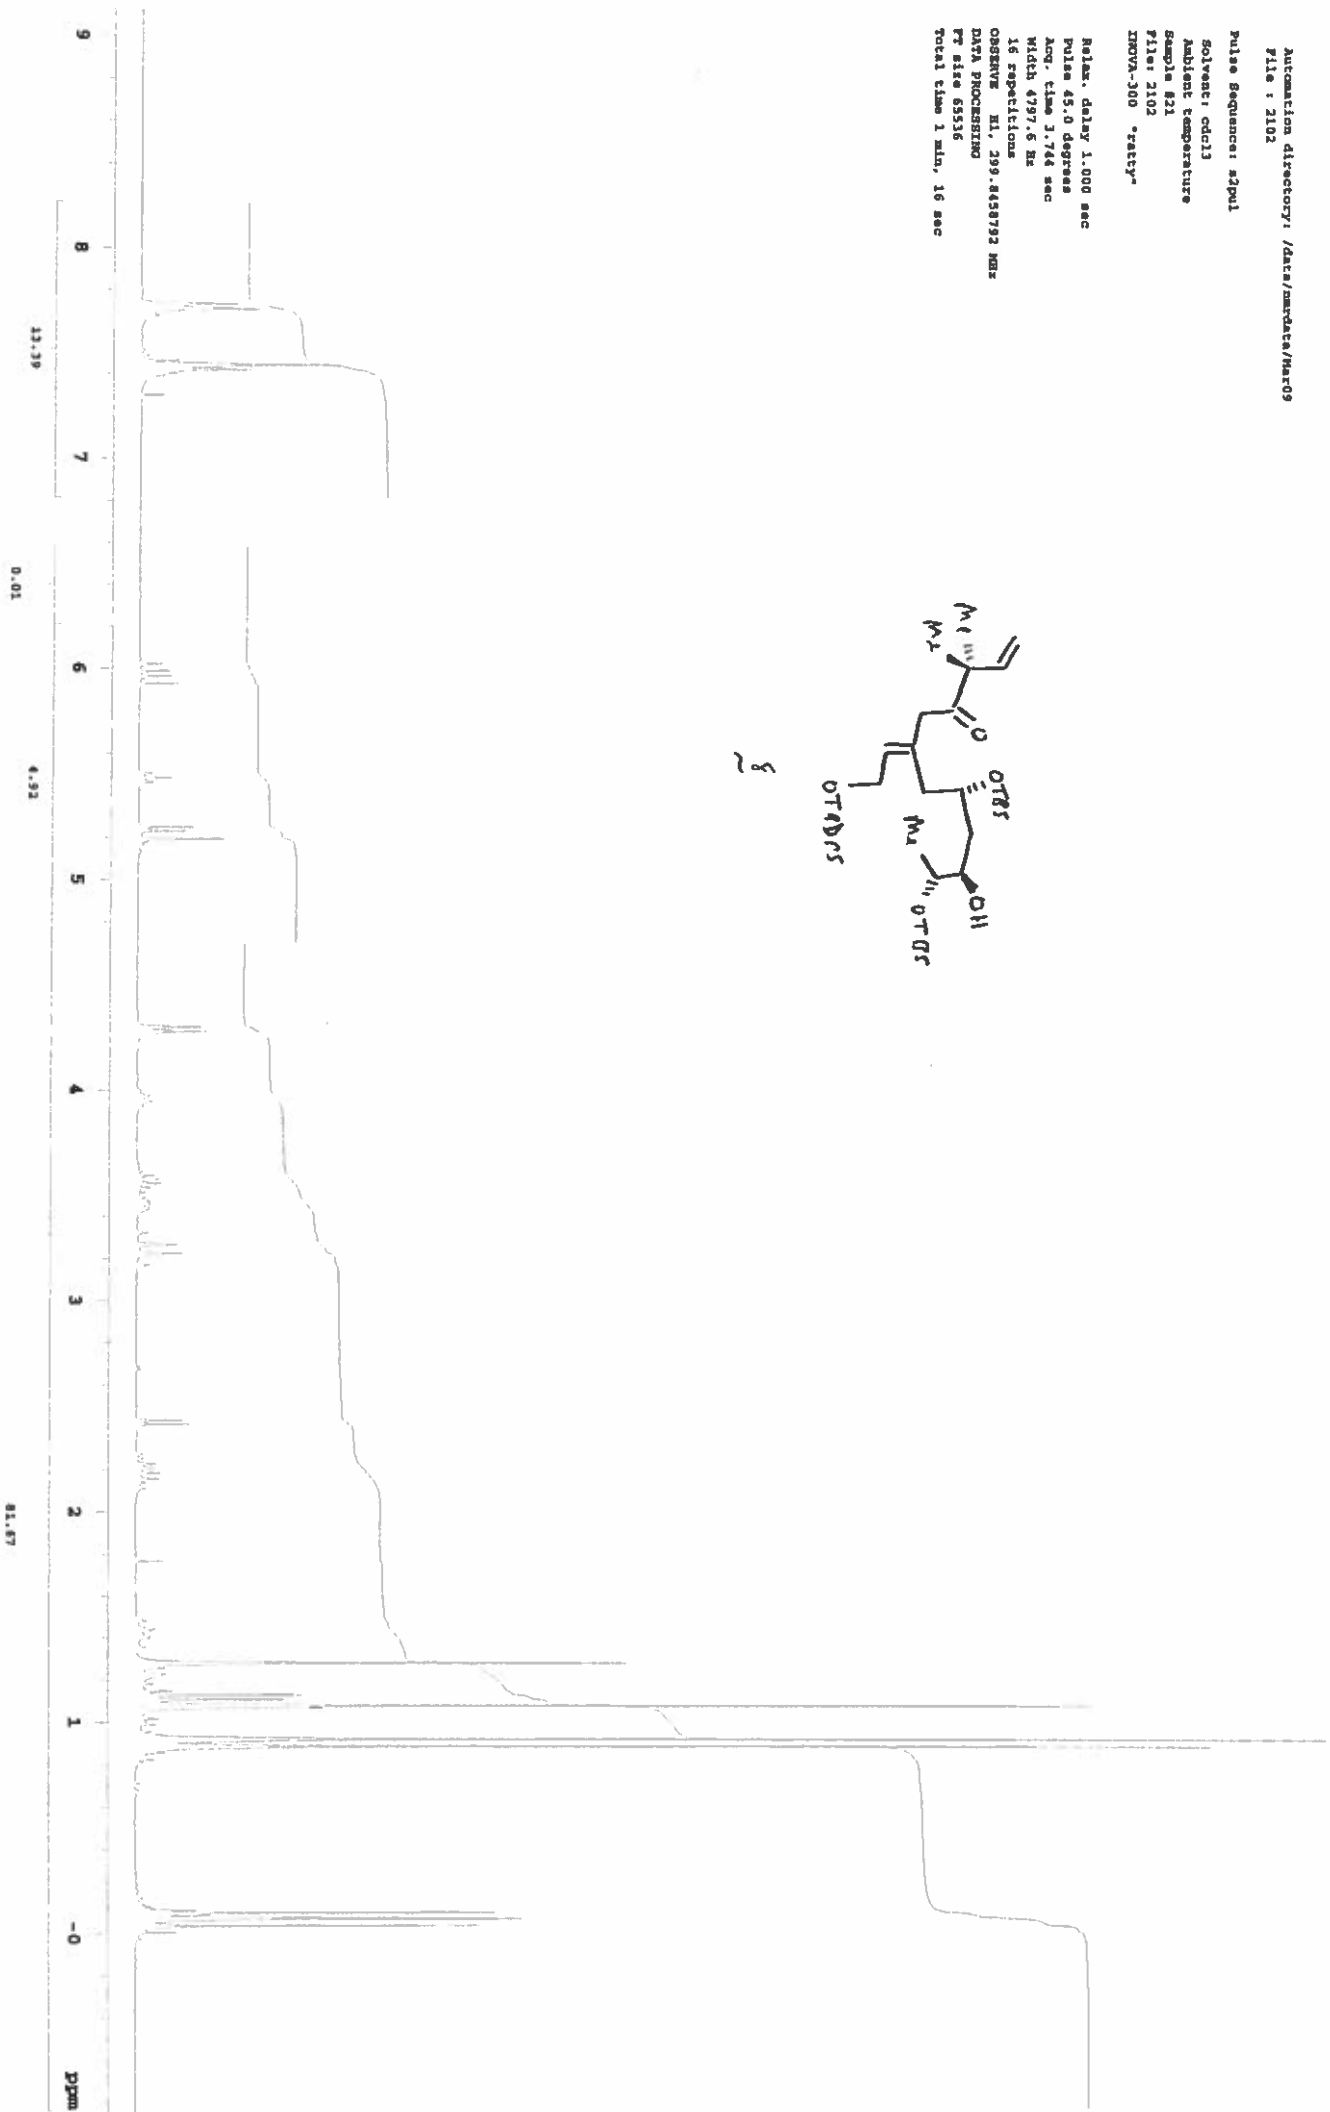

REG  
11C OBSERVE

pad-2 run with f1nd0 before acquisition

Automation directory: /data/rawdata/Mario  
File: 0601

Pulse Sequence: zgpg1  
Solvent: cdcl3  
Ambient temperature  
Sample #6  
File: 0601  
INOVA-300 "ratty"

Relax. delay 1.000 sec  
Pulse 45.0 degrees  
Acq. time 1.815 sec  
Width 18850.1 Hz  
256 repetitions  
OBSERVE CH, 75.3962883 MHz  
DECOUPLE H1, 299.8473786 MHz  
Power 37 dB  
continuously on  
MALTZ-16 modulated  
DATA PROCESSING  
Line broadening 1.0 Hz  
FT size 131072  
Total time 12 min, 2 sec

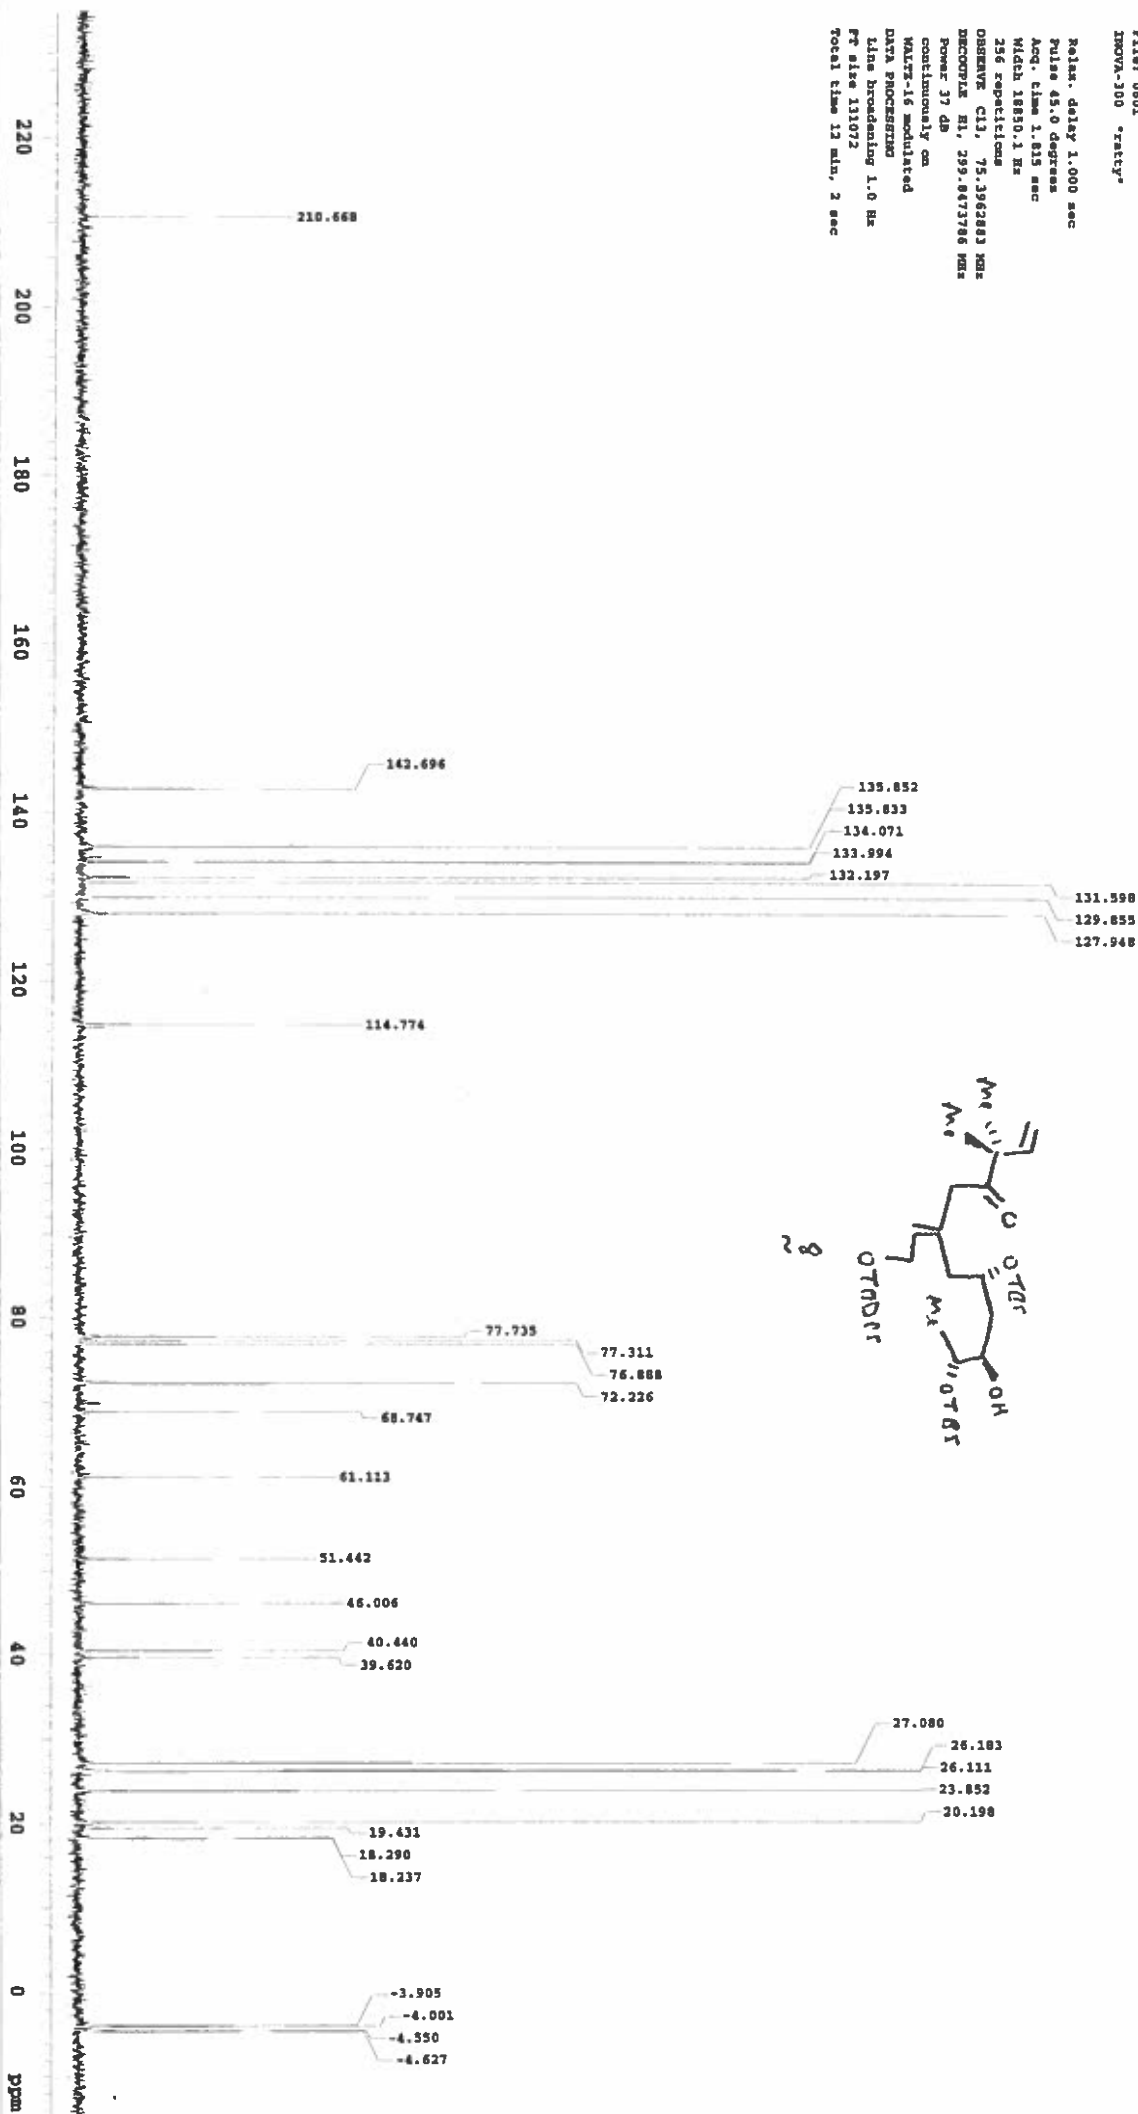

Automation directory: /data/mrcdata/2028  
 file : 0501

Pulse sequence: zgpg1  
 Solvent: CSD6  
 DATE Jan 28 2005  
 Sample 85  
 File: 0501  
 INOVA-300 "rctty"

Relax. delay 1.000 sec  
 Pulse 45.0 degrees  
 Acq. time 3.744 sec  
 Width 4797.6 Hz  
 32 repetitions  
 OBSERVE H1 299.8459062 MHz  
 DATA PROCESSING  
 FT size 65536  
 Total time 3 min, 32 sec

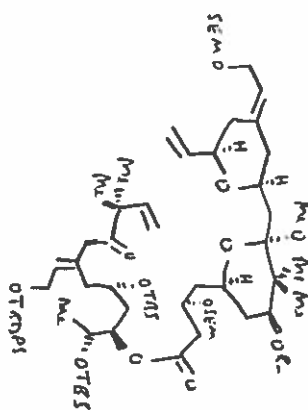

2

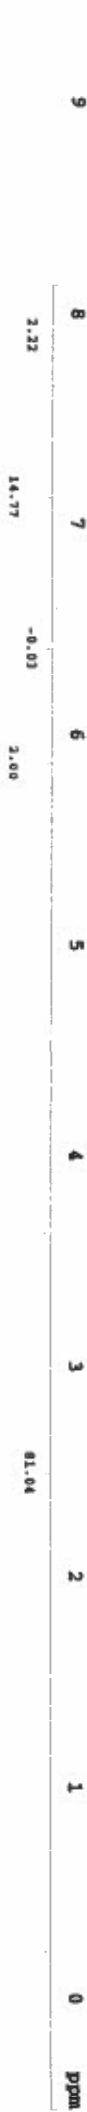

Automation directory: /data/mwdata/2an28  
File: 0502

Pulse sequence: zgpg1

Solvent: C6D6

DATE Jan 28 2005

Sample 85

File: 0502

INSTRUMENT: spect

Relax. delay 1.000 sec

Pulse 45.0 degrees

Acq. time 1.815 sec

Width 10850.1 Hz

256 repetitions

OBSERVE C13, 75.3962931 MHz

DECOUPLE H1, 299.8474056 MHz

Power 37 dB

continuously on

WALTZ-16 modulated

DATA PROCESSING

Line broadening 1.0 Hz

FT size 131072

Total time 12 min, 2 sec

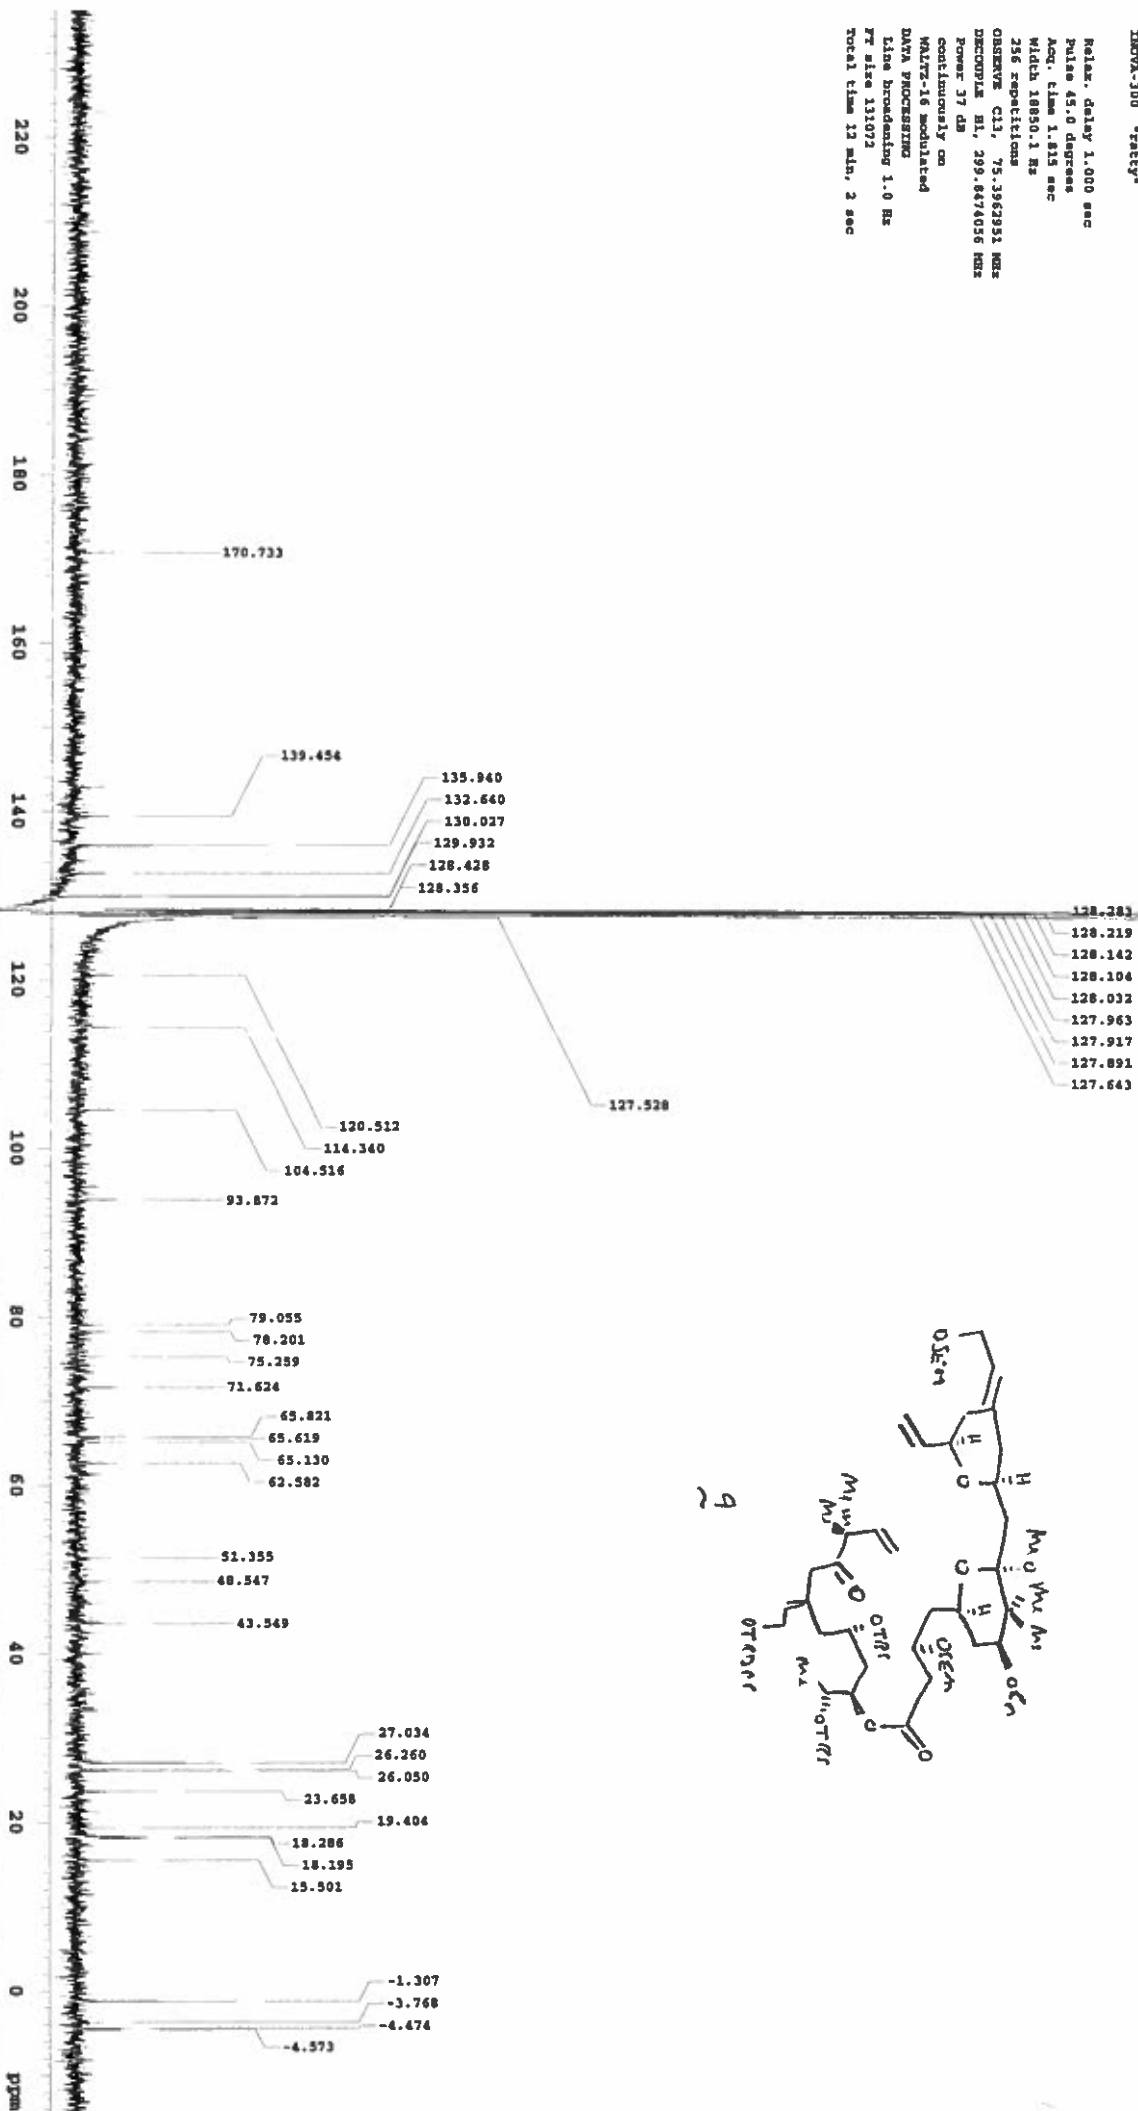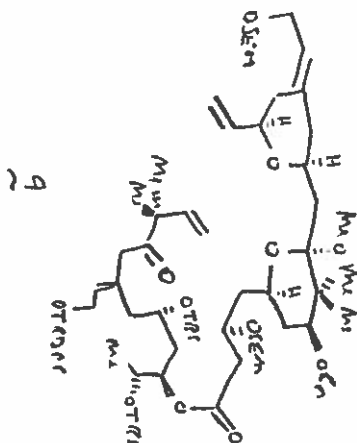

Automation directory: /data/martdata/Apr28  
File : 3101

Pulse Sequence: #2pul

Solvent:  $\text{cdcl}_3$ 

DATE APR 26 2003  
Sample 031

Y11a: 3102

INNOVA-300 -FAEEY-

Relax. delay 1.000 sec

Pulse 45.0 degrees  
Act: Time 1.744 sec

Width 4797.6 Hz

16 repetitions  
OBSERVE III, 2

## DATA PROCESSING

Total time 1

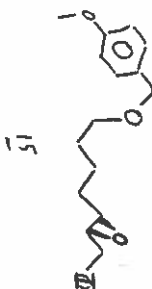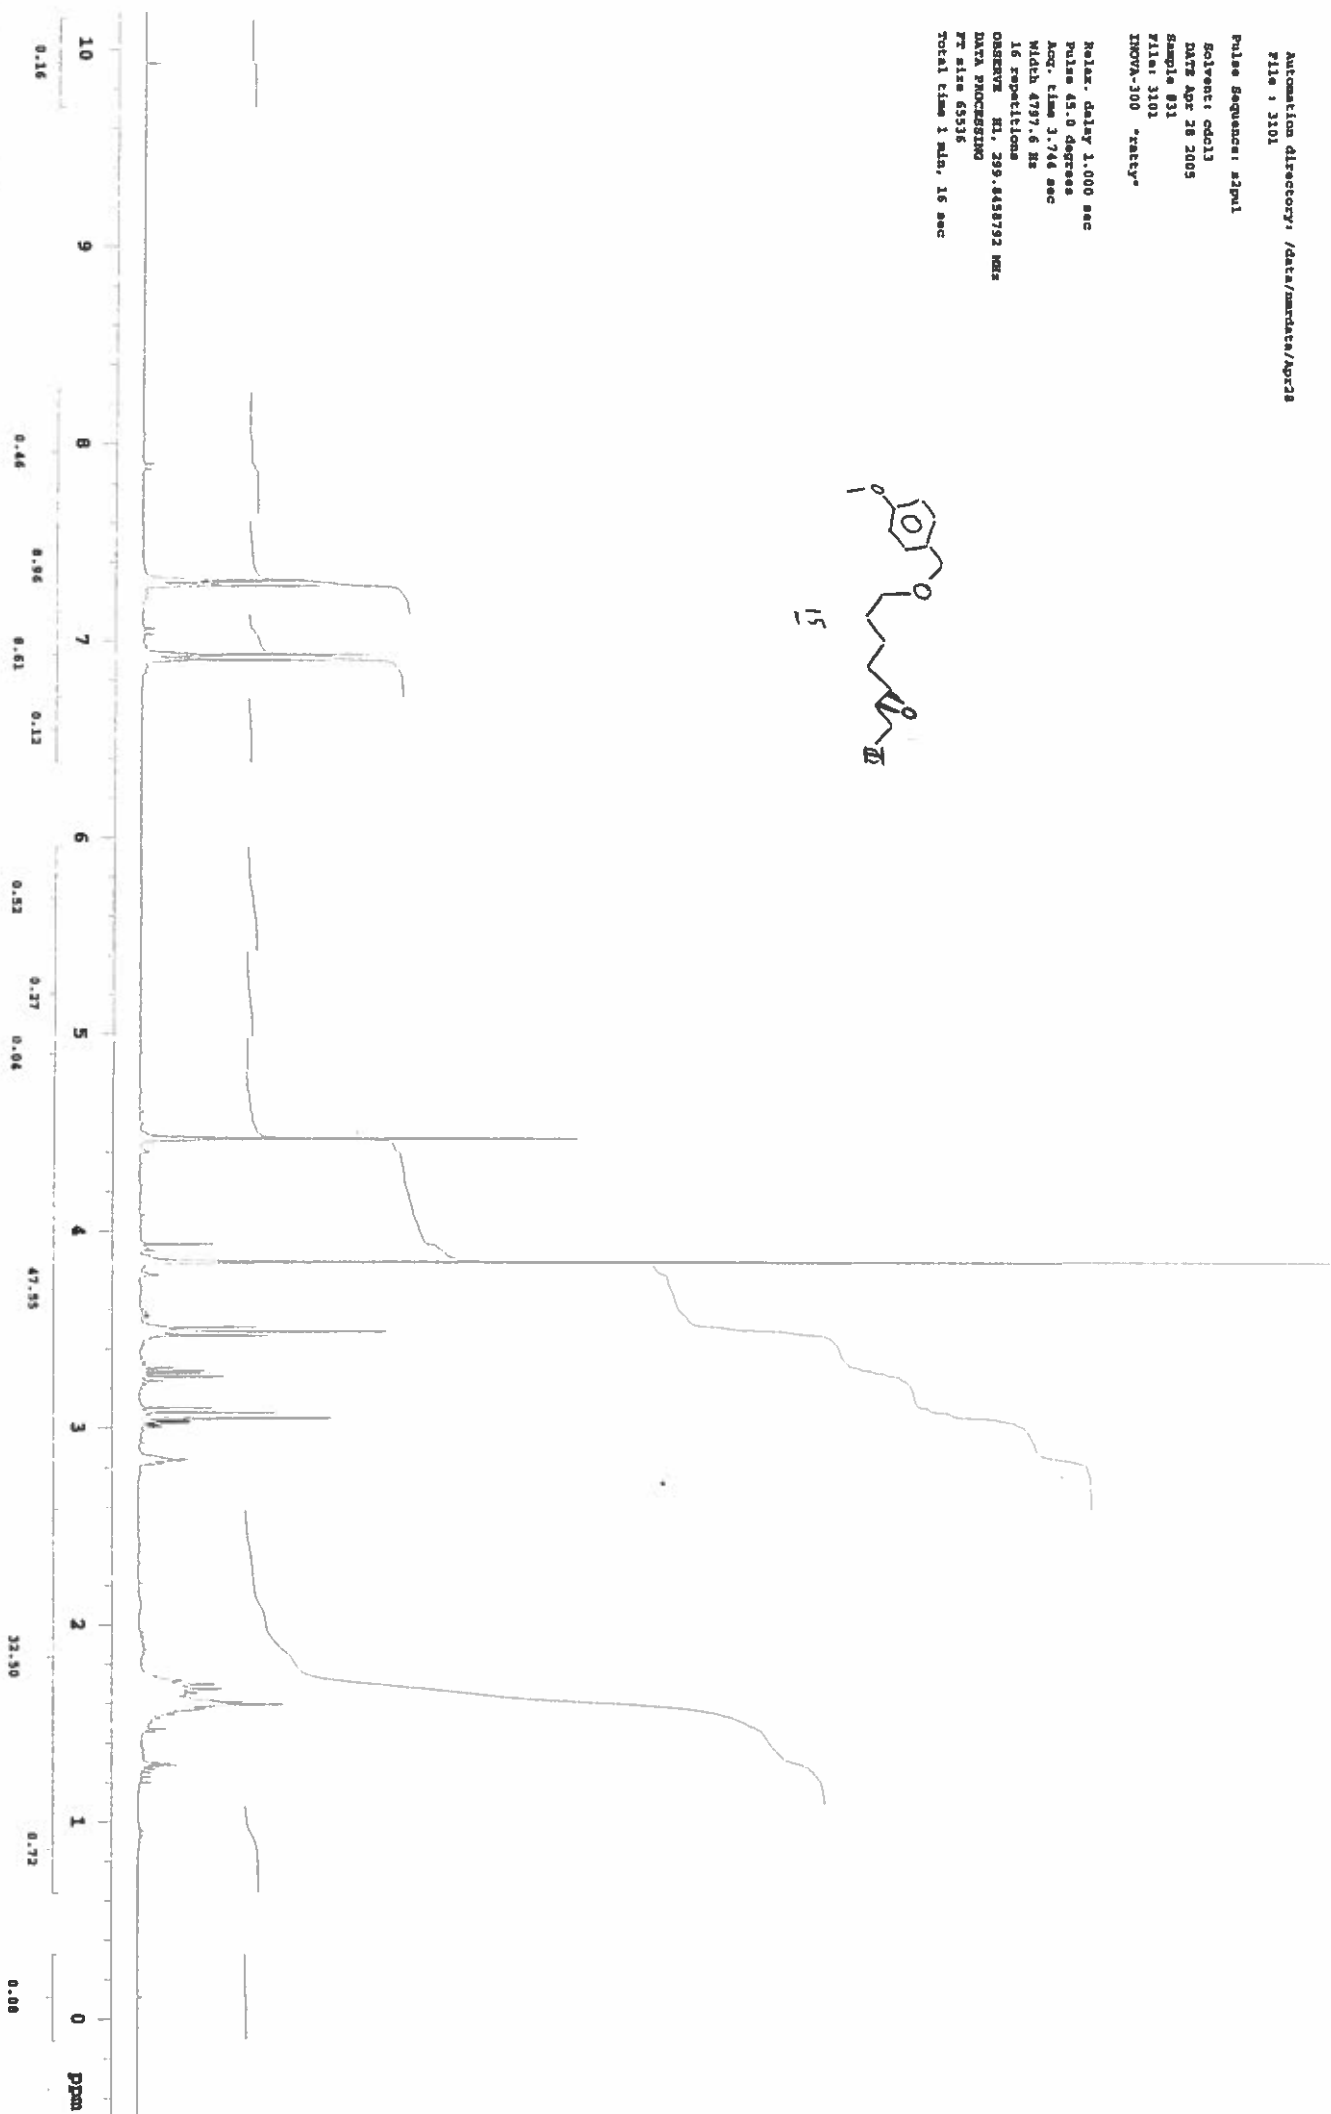

Automation directory: /data/rmrdate/Apr28  
File : 3102

Pulse Sequence: zgpg  
Solvent: cdcl3  
Date: Apr 28 2005  
Sample #31  
File: 3102  
INSTR: 300 "Prestige"

Relax. delay 1.000 sec  
Pulse 45.0 degrees  
Acq. time 1.815 sec  
Width 18850.1 Hz  
256 repetitions  
OBSERVE ch3 75.362803 MHz  
DECOUPLE H1, 299.8473786 MHz  
Power 37 dB  
continuously on  
WALTZ-16 modulated  
DATA PROCESSING  
Line broadening 1.0 Hz  
FT size 131072  
Total time 12 min, 2 sec

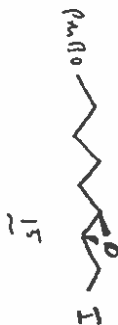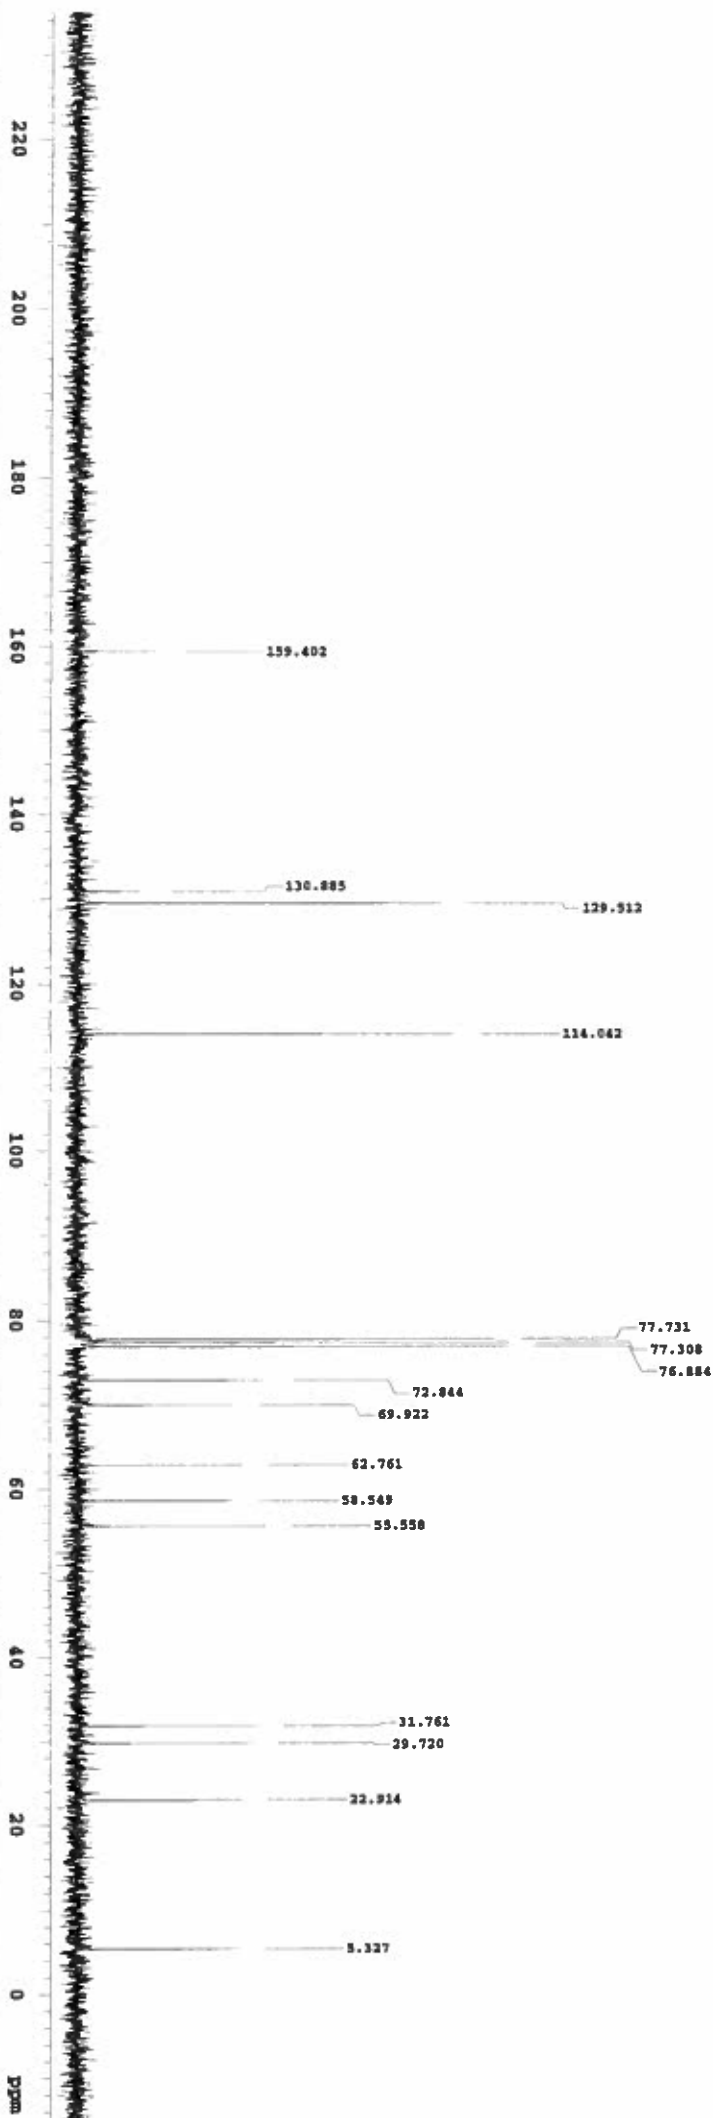



Automation directory: /data/rmdata/may09  
File : 0901

Pulse Sequence: zgpg1  
Solvent: cdcl3  
Date May 9 2005  
Sample 80  
File: 0901  
INOVA-300 "Fatty"

Relax. delay 1.000 sec  
Pulse 45.0 degrees  
Acq. time 3.744 sec  
Width 4797.6 Hz  
16 repetitions  
OBSERVE H1, 299.8456792 MHz  
DATA PROCESSING  
PT size 65536  
Total time 1 min, 16 sec

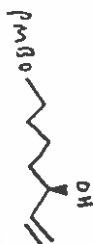

16

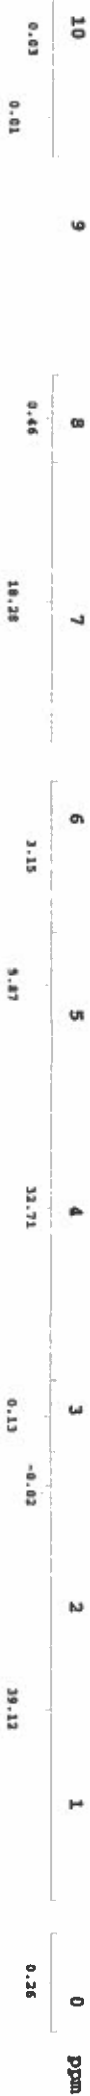

Automation directory: /data/mwdata/may09  
File: 0902

Pulse sequence: zgpg1

Solvent: cdcl3

Date May 9 2005

Sample #9

File: 0902

INOVA-300 "raccy"

Pulpr. delay 1.000 sec

Pulpr. 45.0 degrees

Acq. time 1.815 sec

Width 18850.1 Hz

256 repetitions

OBSERVE CH. 75.362883 MHz

DECOUPLE H1. 299.8473786 MHz

Power 37 dB

continuously on

WALTZ-16 modulated

DATA PROCESSING

Line broadening 1.0 Hz

FT size 131072

Total time 12 min, 2 sec

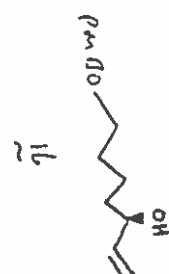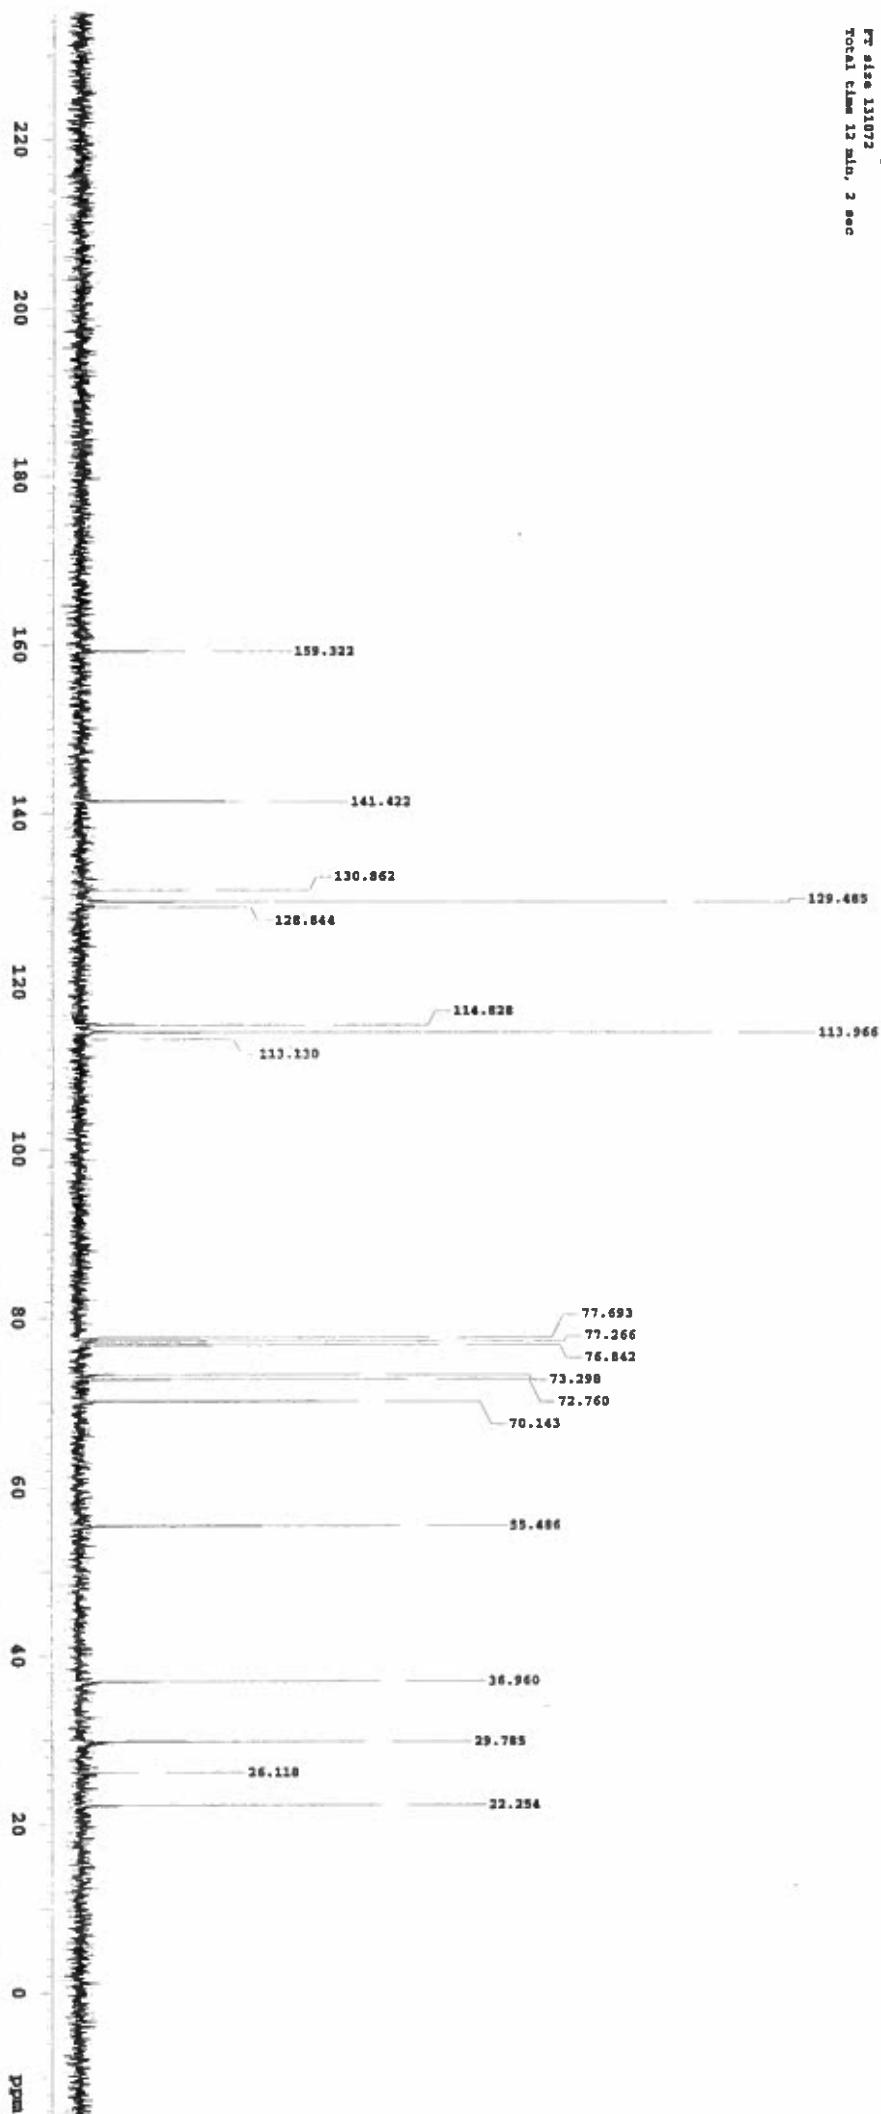

Automation directory: /data/mwdata/may23  
File: 3301

Pulse sequence: zgpg1  
Solvent: cdcl3  
DATE May 23 2005  
Sample 833  
File: 3301  
INOVA-300 "rcty"

Pulse delay 1.000 sec  
Pulse 45.0 degrees  
Acq. time 3.744 sec  
Width 4797.6 Hz  
16 repetitions  
OBSERVE H1, 299.8458792 MHz  
DATA PROCESSING  
PT size 65536  
Total time 1 min, 16 sec

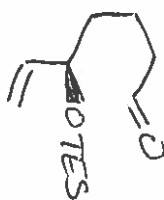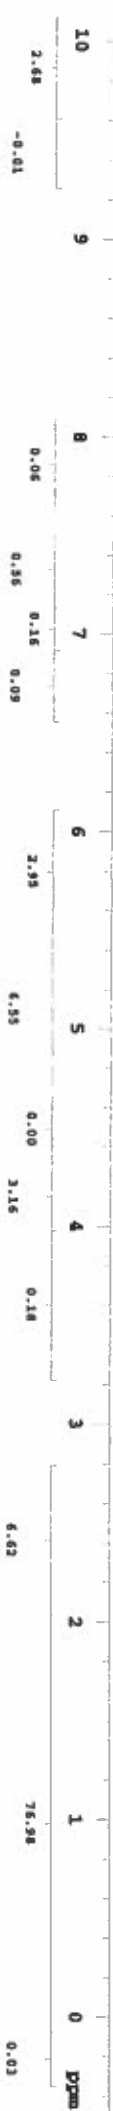

Automation directory: /data/mrdate/may23  
File : 3302

Pulse Sequence: zgpg1  
Solvent: cdcl3  
DATE May 23 2005  
Sample #33  
File: 3302  
INSTR-300 "recty"

Relax. delay 1.000 sec  
Pulse 45.0 degrees  
Acq. time 1.815 sec  
Width 18850.1 Hz  
356 repetitions  
OBSERVE CH: 75.362803 MHz  
NUC1: 13C, 299.867786 MHz  
Power 37 dB  
continuously on  
WALTZ-16 modulated  
DATA PROCESSING  
line broadening 1.0 Hz  
FT alias 13072  
Total time 13 min, 2 sec

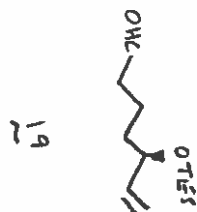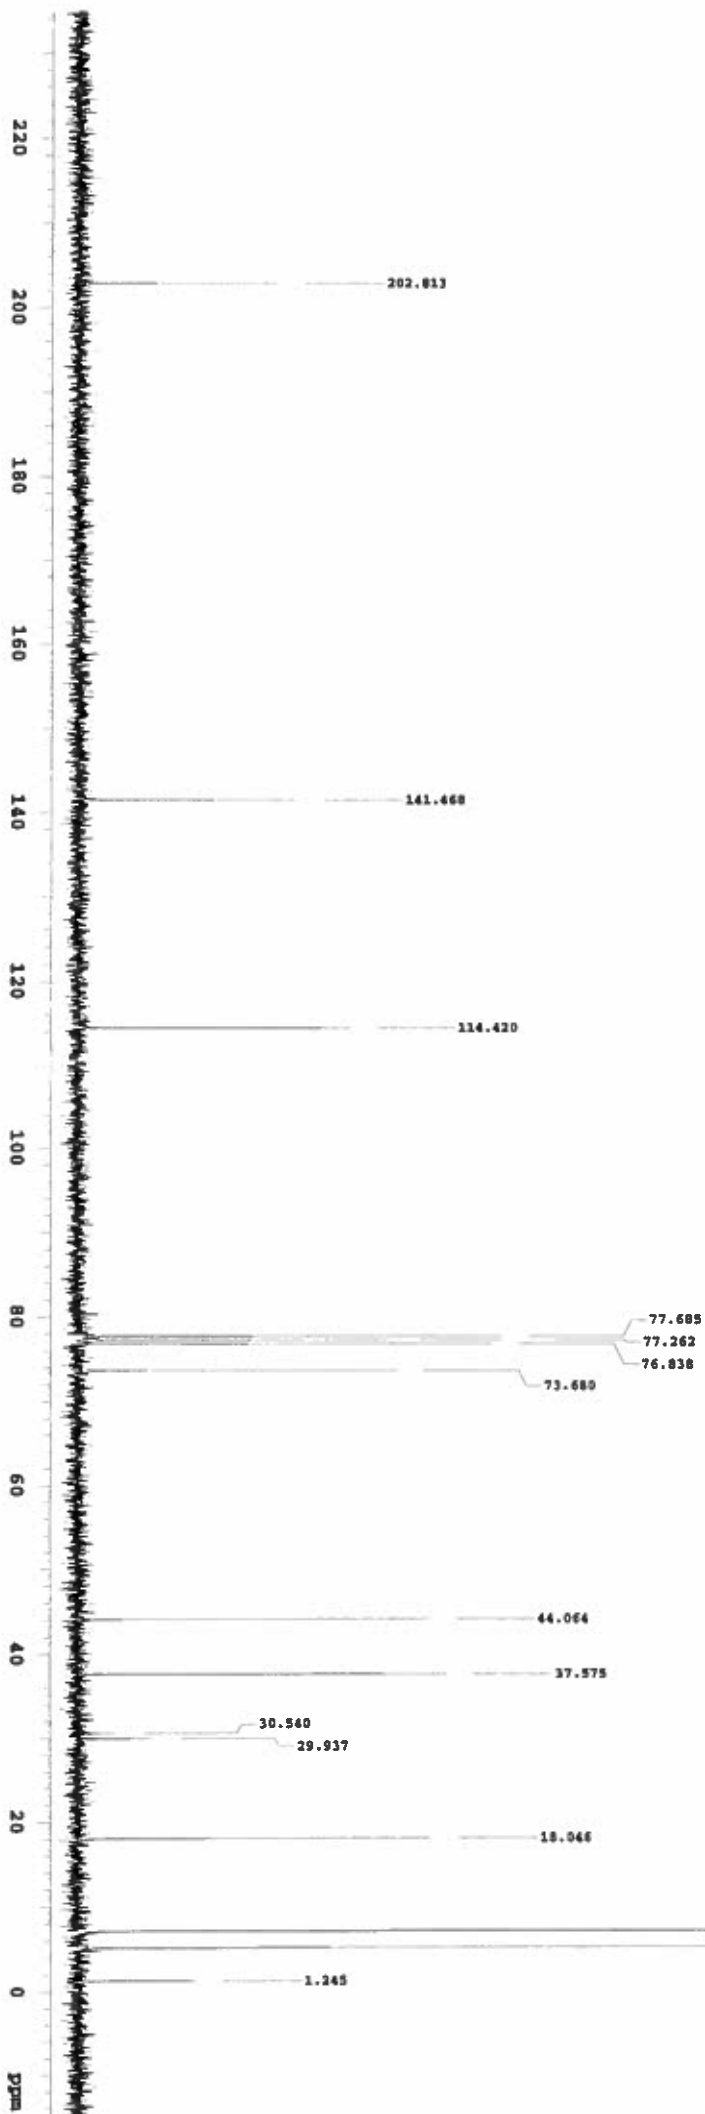

Automation directory: /data/mwdata/may27  
File: 2601

Pulse sequence: zgpg1

Solvent: CDCl3 *in CDCl3*

DATE: May 27 2005

Sample: 826

File: 2601

INVT-300 "relax"

Relax. delay: 1.000 sec  
Pulse: 45.0 degrees  
Acq. time: 3.746 sec  
Width: 4797.6 Hz  
16 repetitions  
OBSERVE: KL 299.0450792 MHz  
DATA PROCESSING  
FT size: 65536  
Total time: 1 min, 16 sec

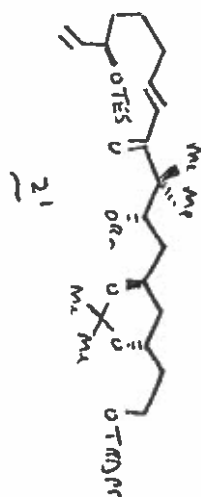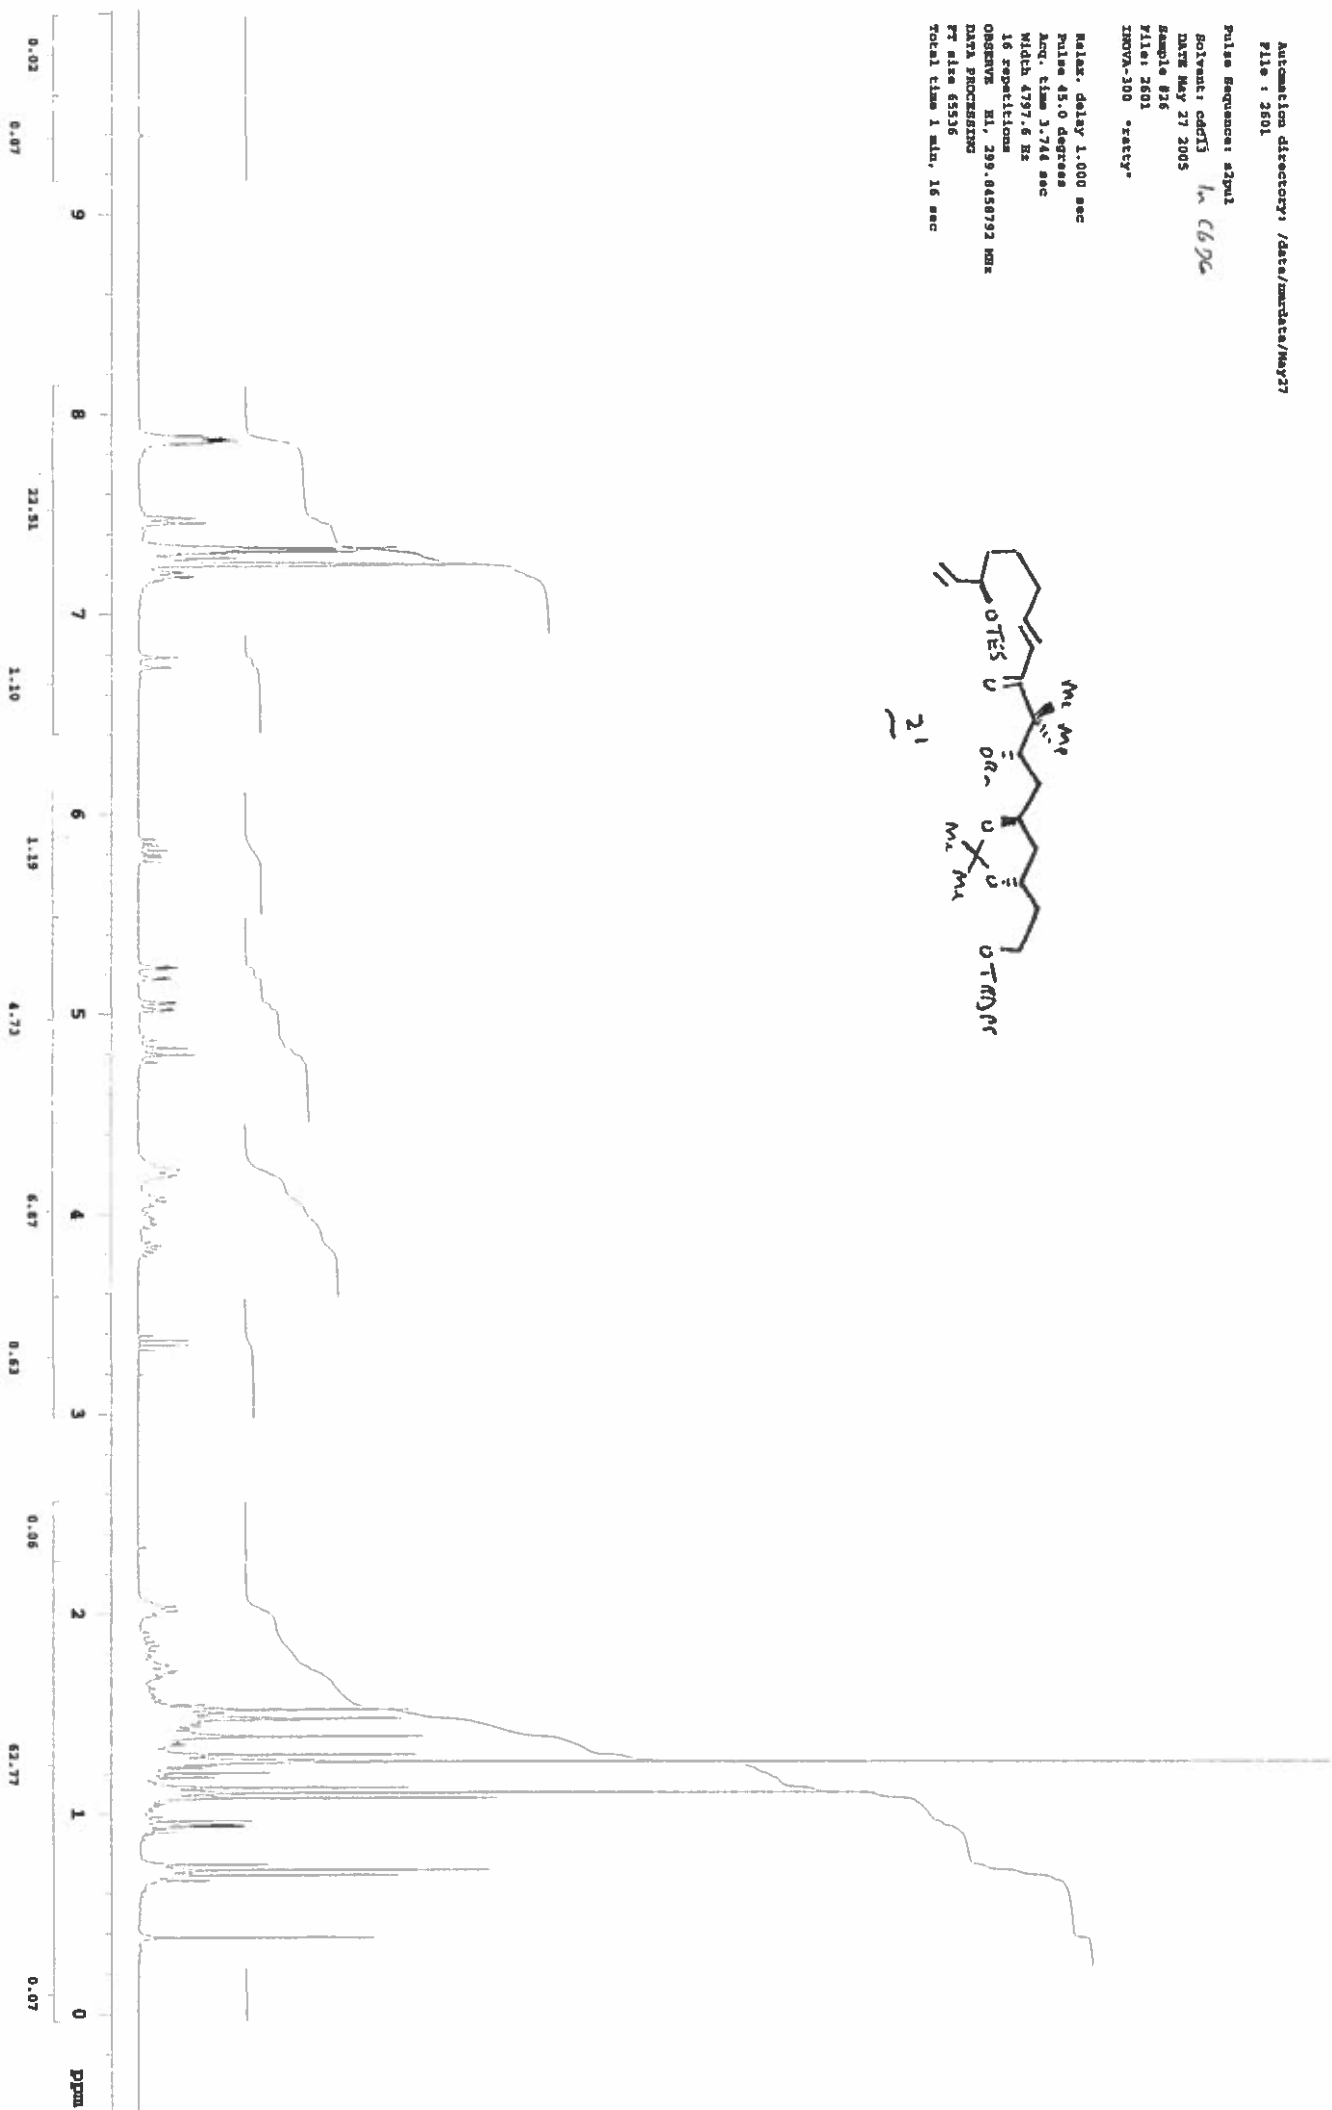

msccc-06-51  
STANDARD IR OBSERVE

Automation directory: /data/rmdata/May27  
File : 4901

Pulse Sequence: zgpg30  
Solvent: CDCl3  
Date May 27 2005  
Sample 849  
File: 4901  
INOVA-300 "crazy"

Relax. delay 1.000 sec  
Pulse 45.0 degrees  
Acq. time 3.744 sec  
Width 4797.6 Hz  
16 repetitions  
OBSERVE H1, 299.8439063 MHz  
DATA PROCESSING  
FT size 65536  
Total time 1 min, 16 sec

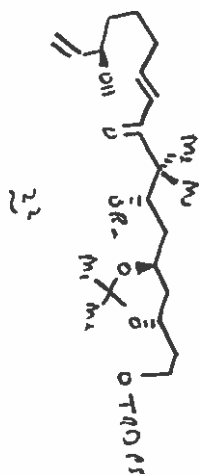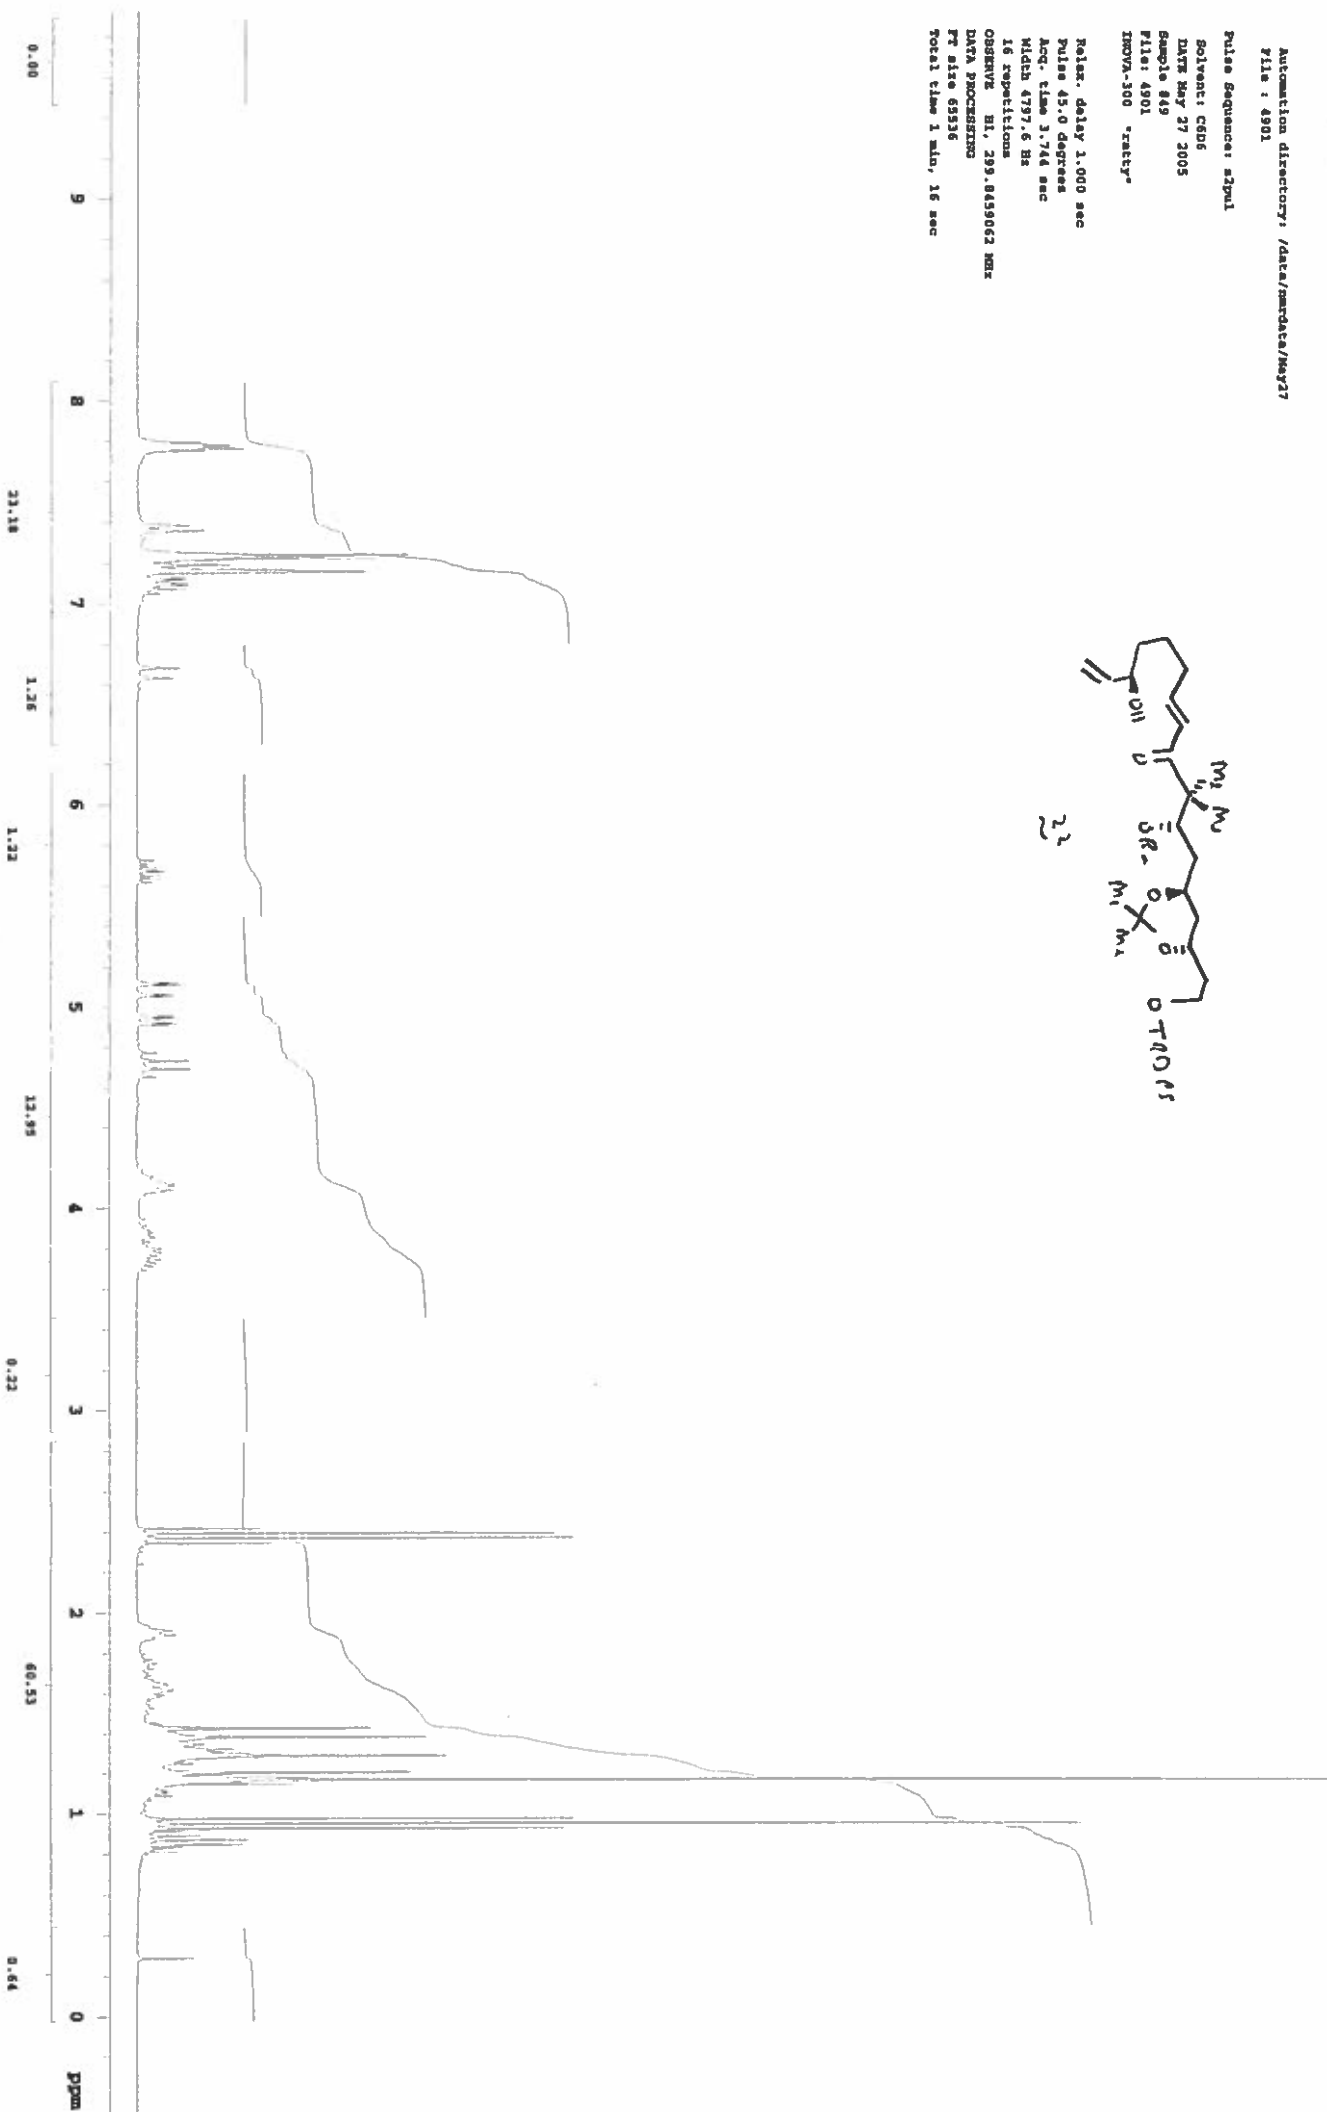

Automation directory: /data/murdata/may27  
File: 4902

Pulse Sequence: zgpg1

Solvent: CDCl<sub>3</sub>

DATE May 27 2005

Sample 849

File: 4902

INOVA-100 "ratty"

Relax. delay 1.000 sec

Pulse 45.0 degrees

Acq. time 1.815 sec

Width 18850.1 Hz

256 repetitions

OBSERVE C13, 75.362951 MHz

DECOUPLE H1, 299.8474056 MHz

Power 37 dB

continuously on

DATA PROCESSING

Line broadening 1.0 Hz

FT size 131072

Total time 12 min, 2 sec

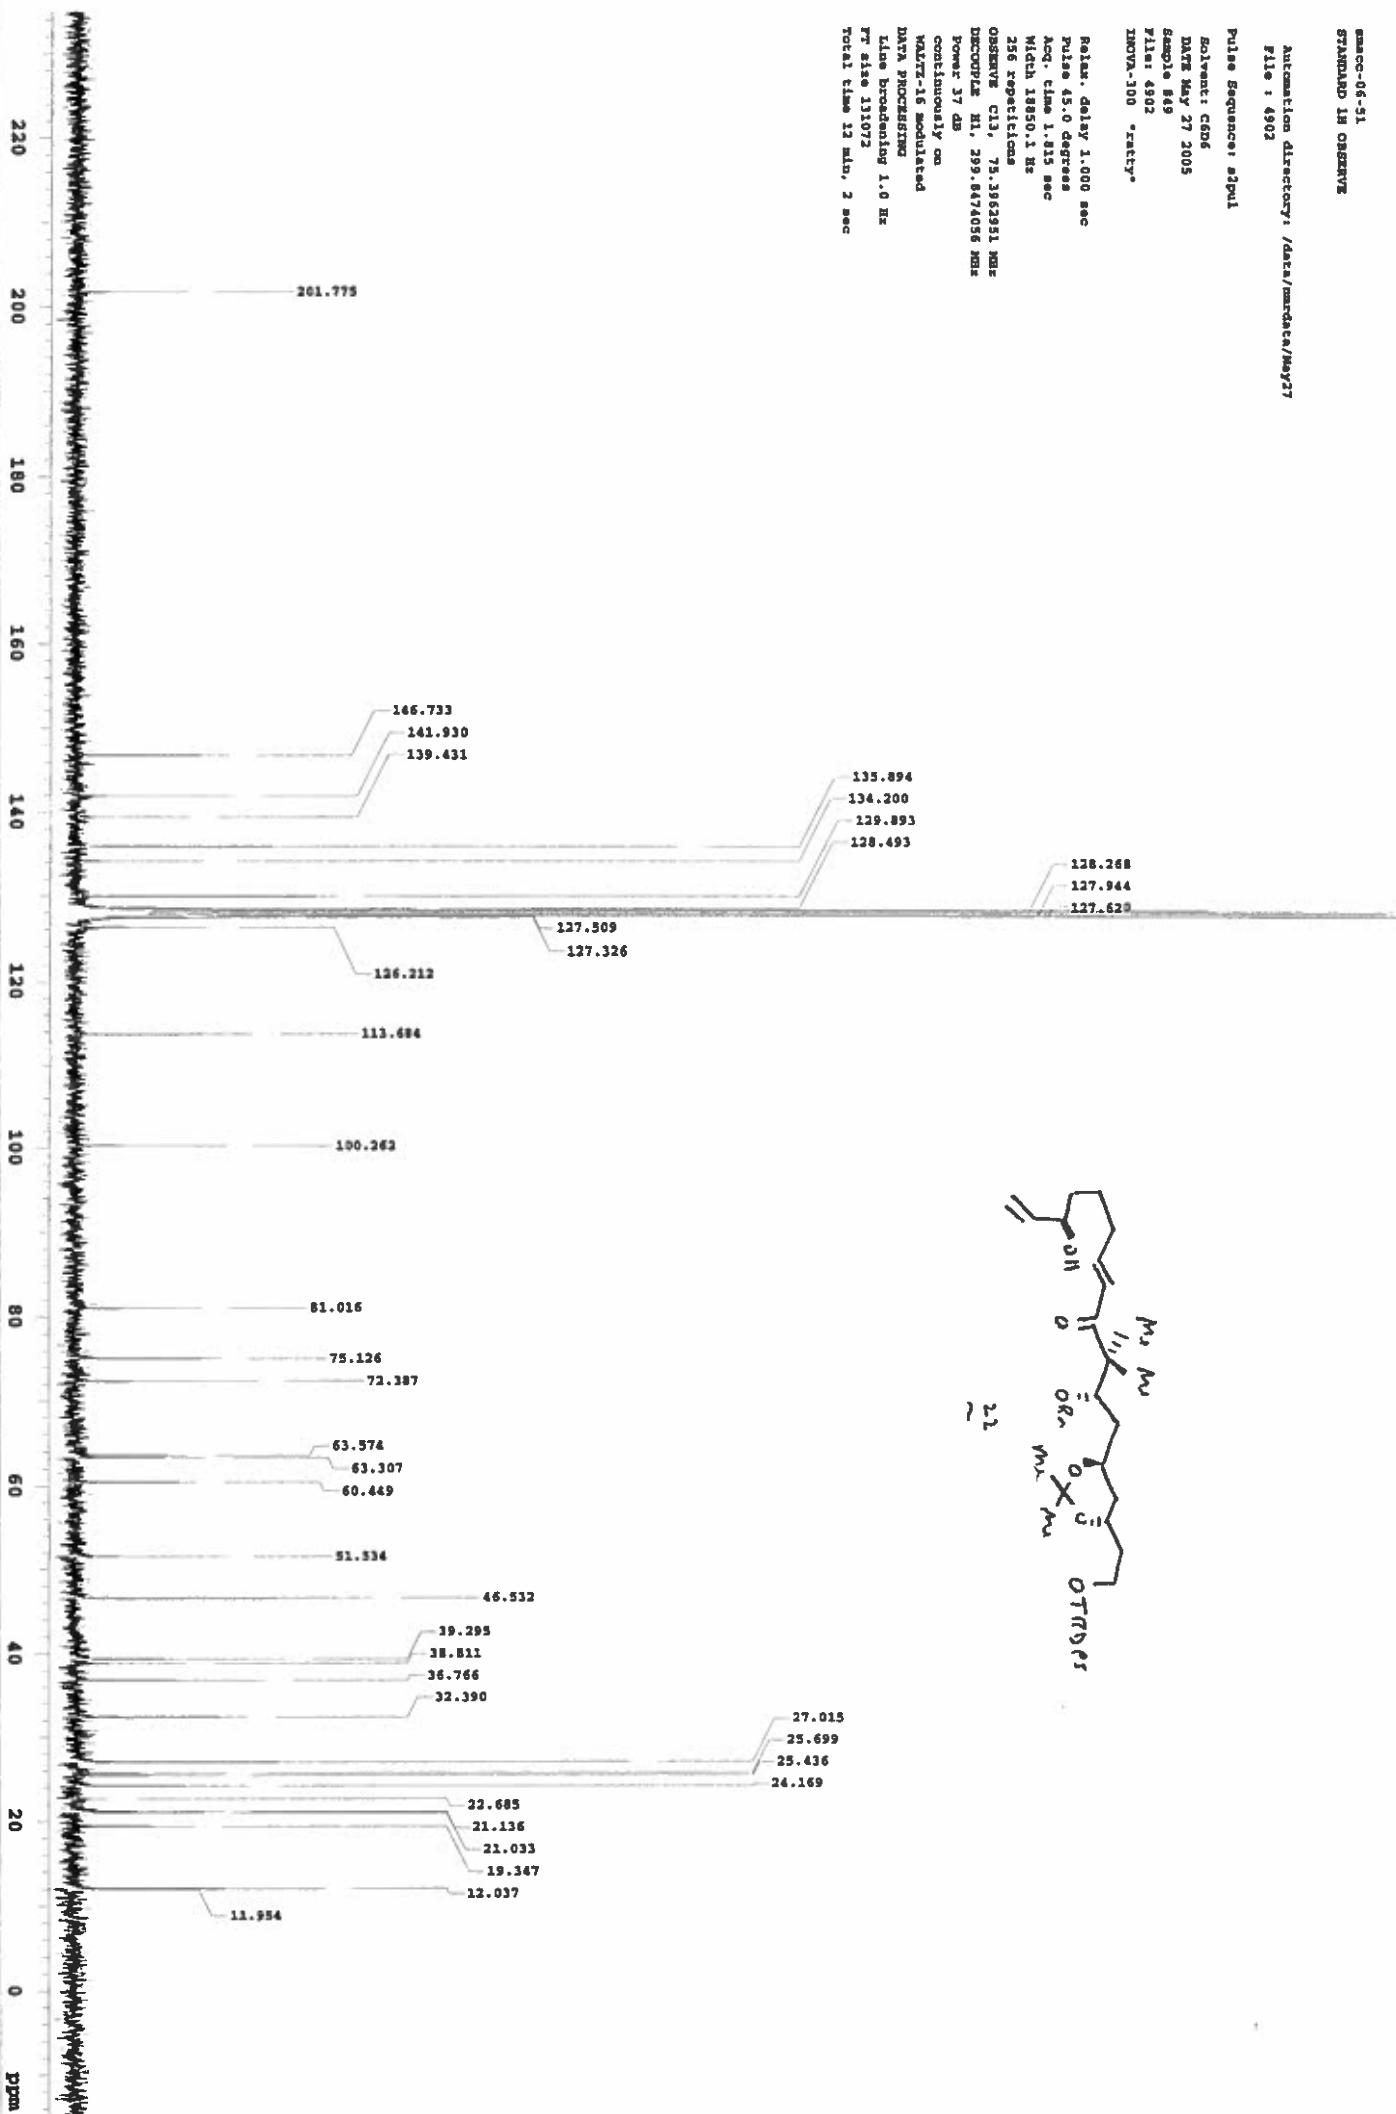

Automation directory: /data/rawdata/may31  
File: 1001

Pulse Sequence: zgpg1

Solvent: cdcl3

Date May 31 2005

Sample 810

File: 1001

INOVA-300 "reacty"

Relax. delay 1.000 sec

Pulse 45.0 degrees

Acq. time 3.744 sec

Width 4797.6 Hz

16 repetitions

OBSERVE H1, 299.8458732 MHz

DATA PROCESSING

PT size 65536

Total time 1 min, 16 sec

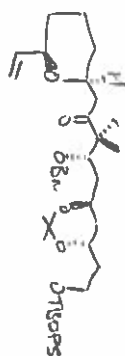

23

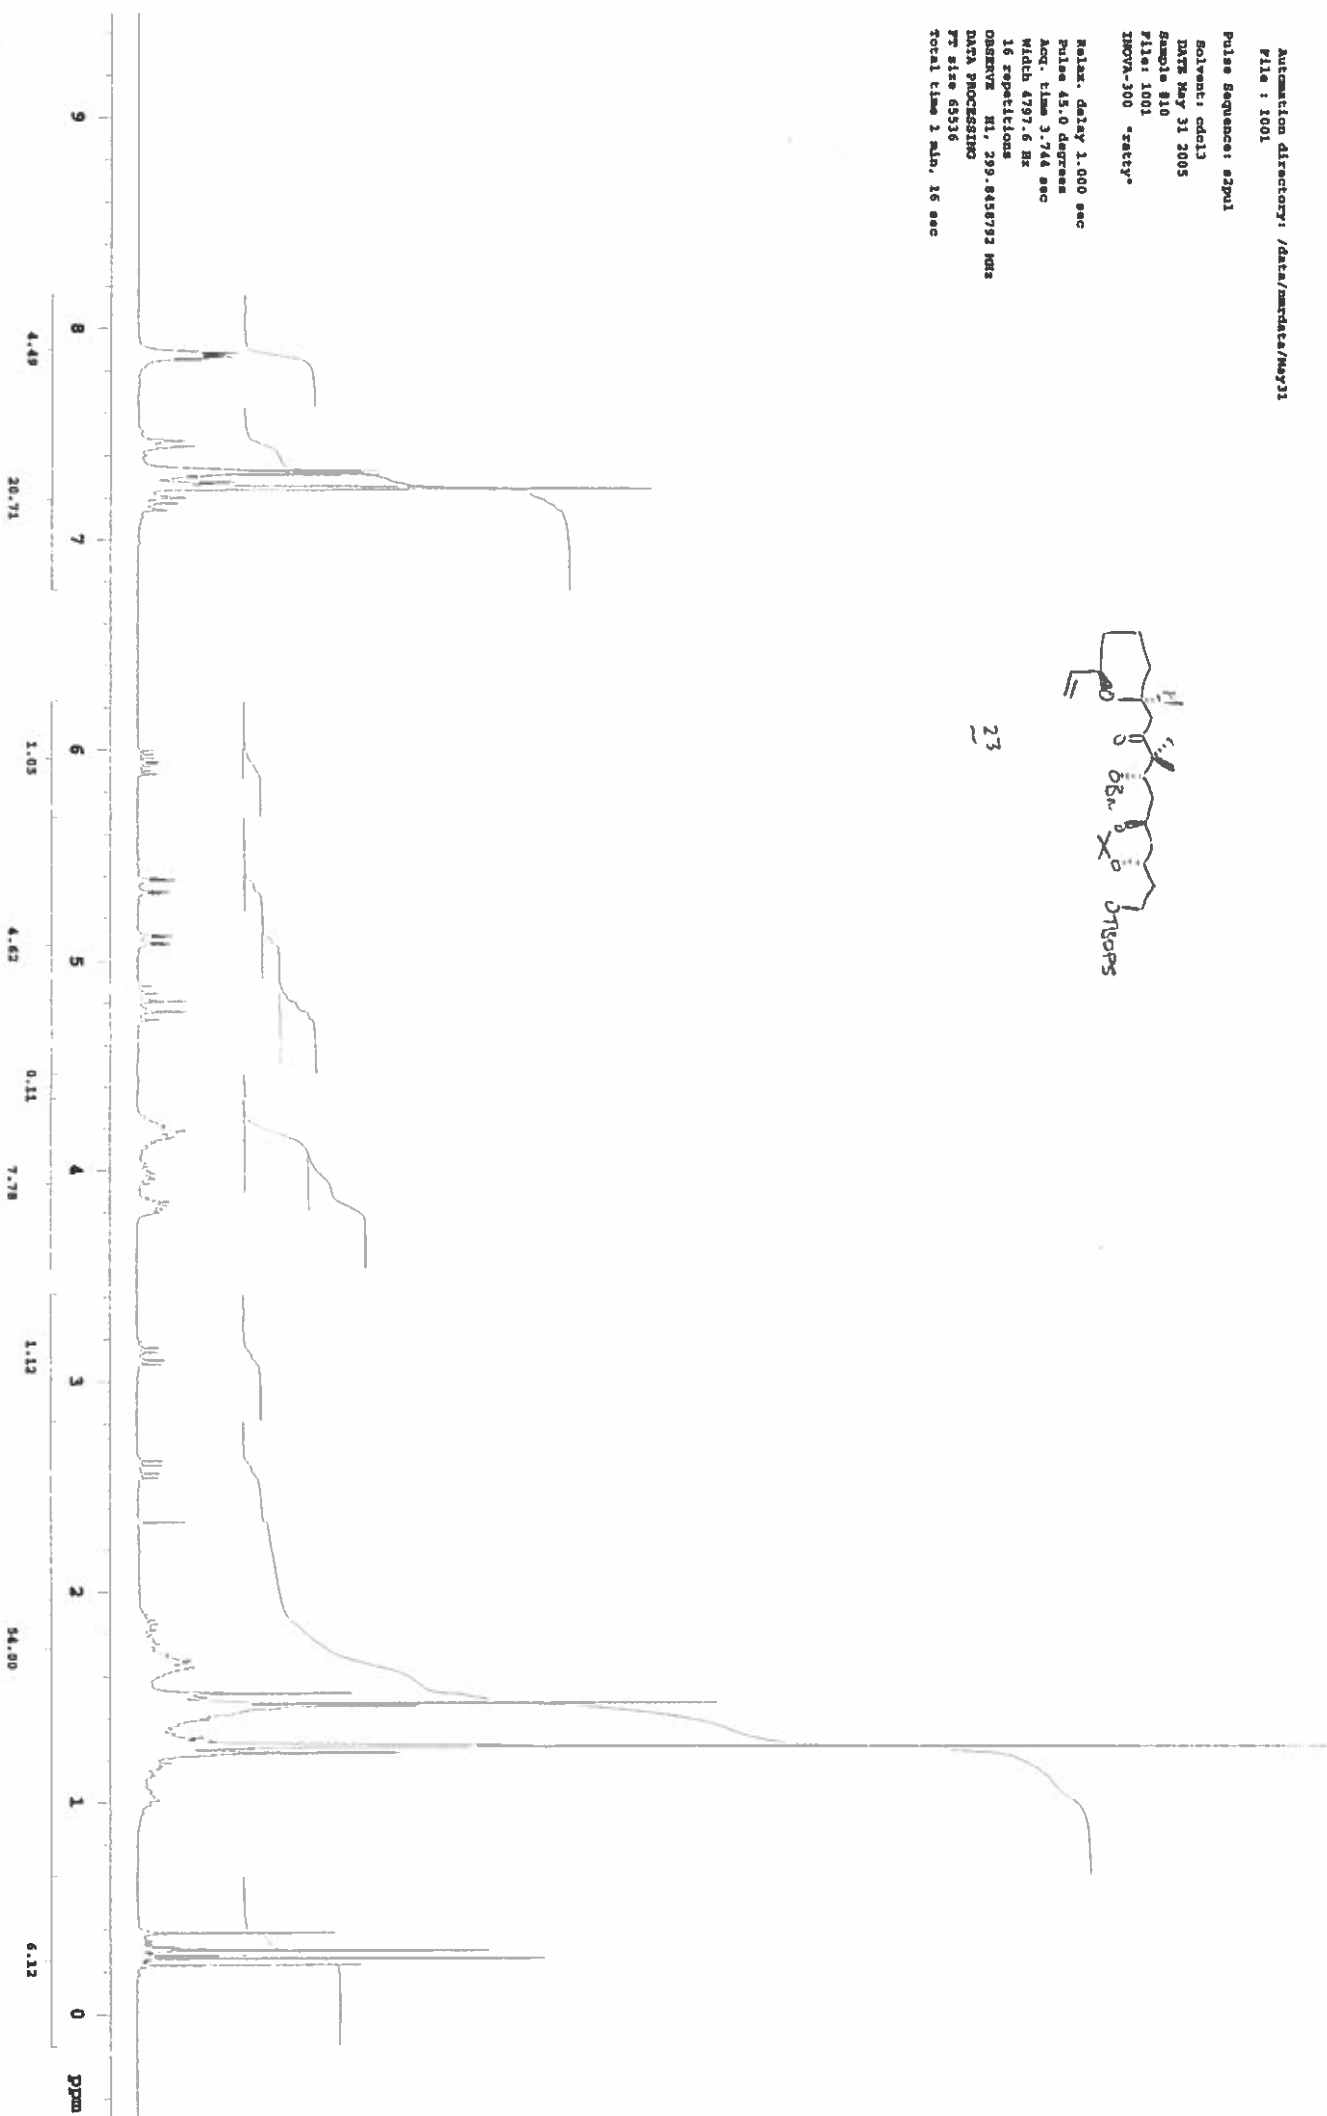



Automation directory: /data/metadata/jm003  
File: 4002

**Pulse Sequence:**  $m2pul$

**Solvent:** C6D6

Sample #10

IMOVA-300 "rally"

Relax. delay 1.000 sec

Acq. time 1.015 sec

Width 10050.1 Hz

OBSEVING C13, 75.3962951 MHz

DECUPLE H1, 299.8474056 MHz  
Power 17 dB

continuously on

**VALTZ-16** modularized  
**DATA PROCESSING**

Line broadening 1.0 Hz

Total time 13 min, 2 sec

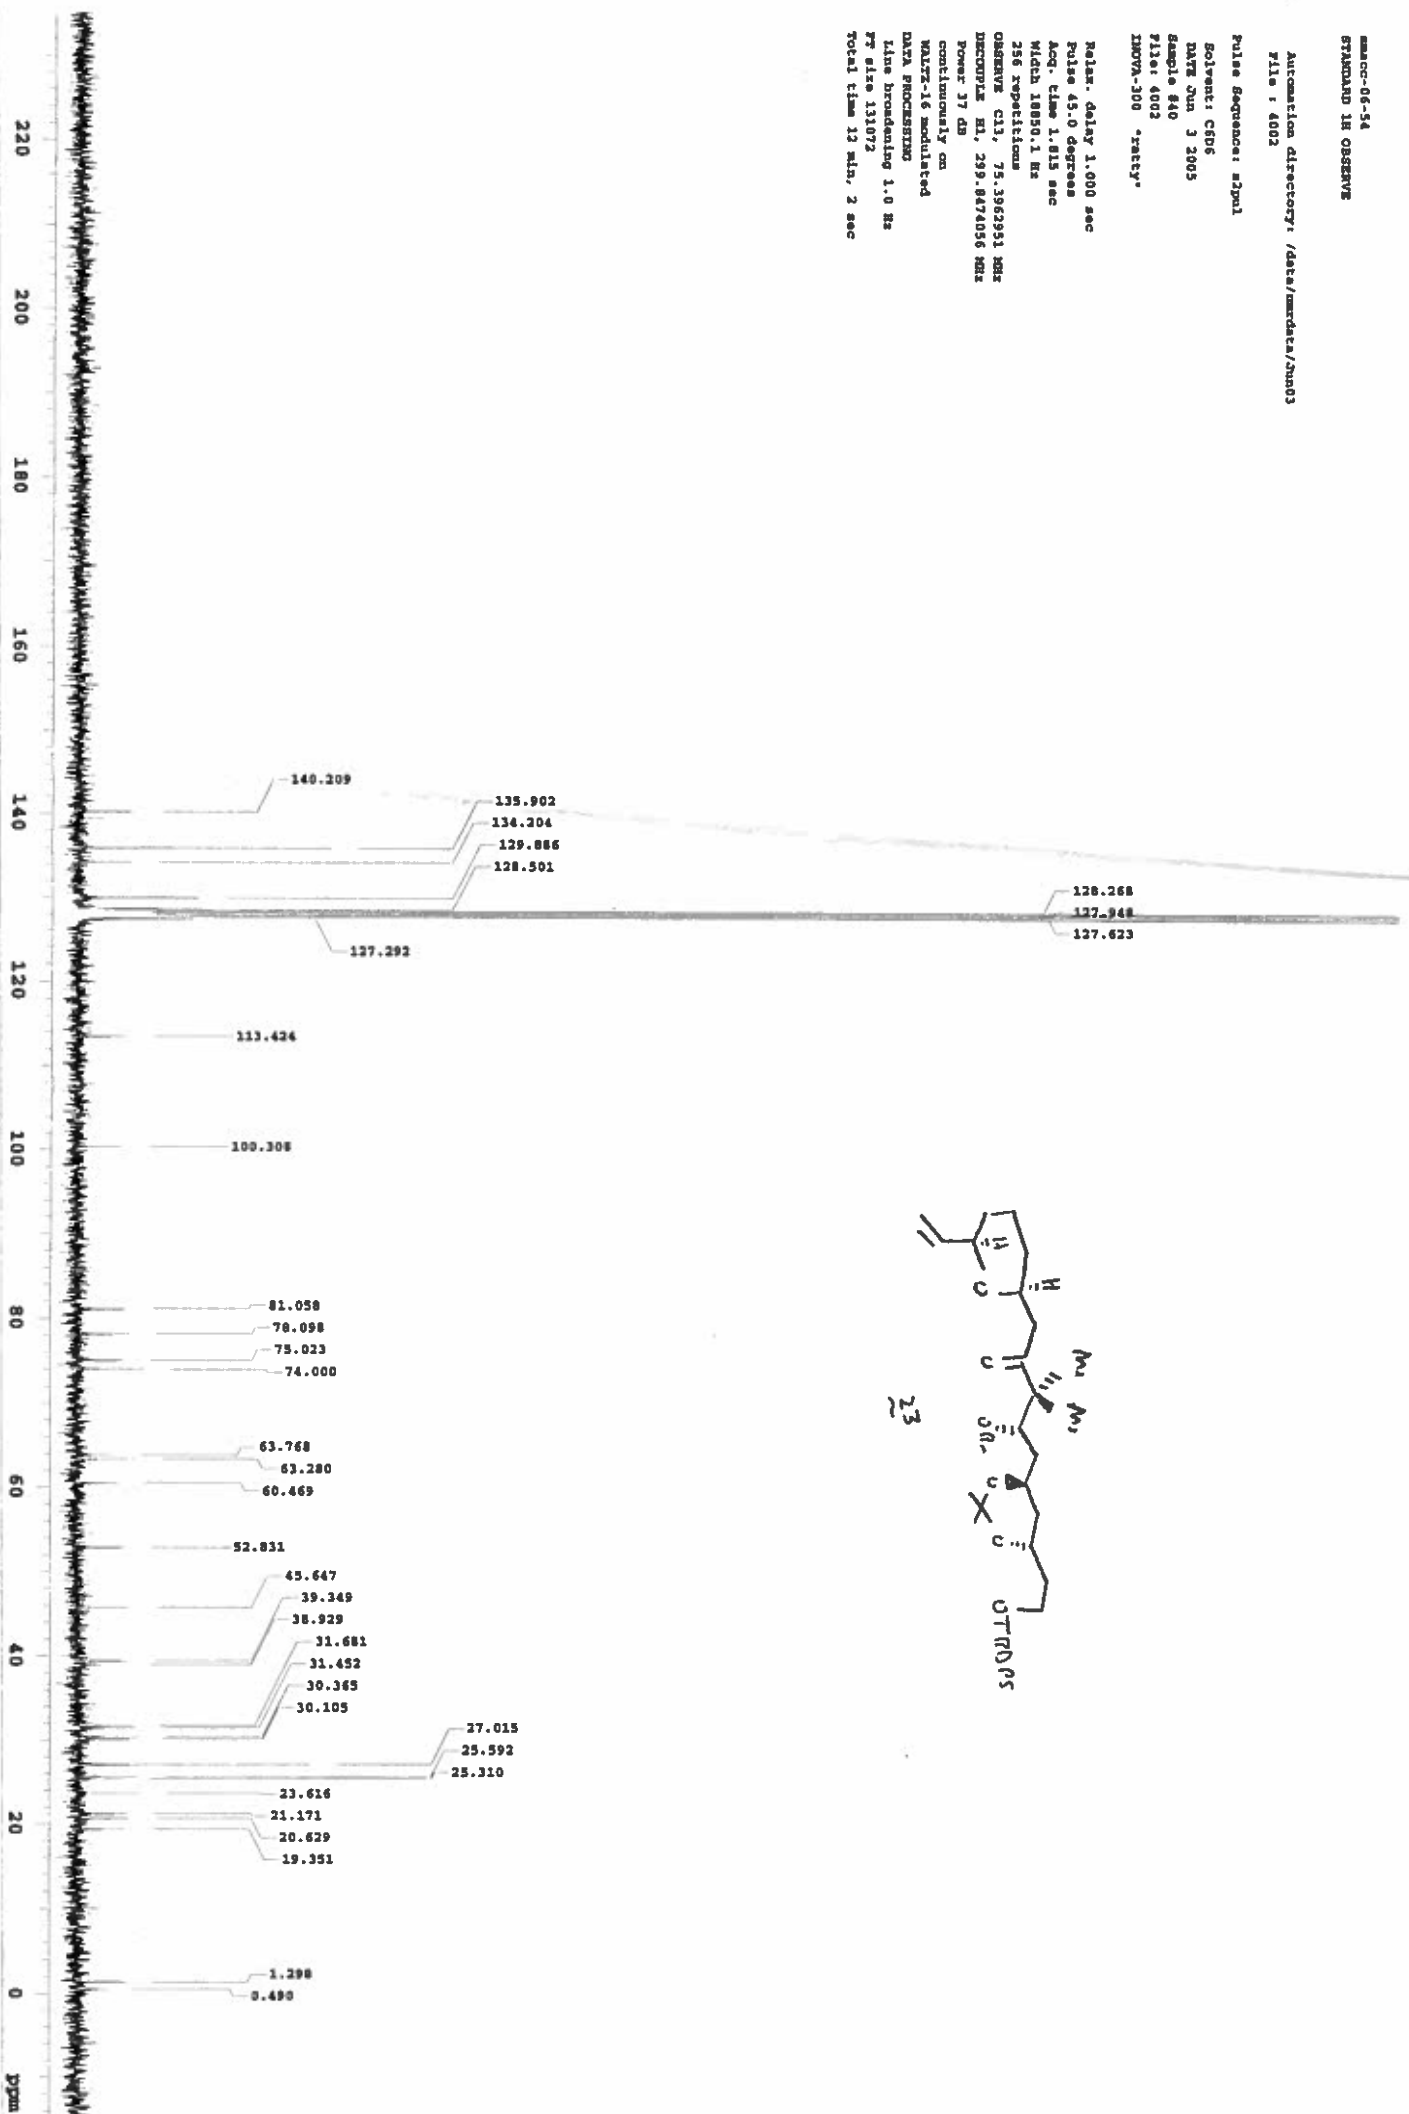

STANDARD 14 OBSERVE  
SMA CG-07-05

Automation directory: /data/martdata/Jul29  
File : 3601

Pulse Sequence:  $m2pul$ 

Solvent: C6D6

Bump: #36

IMOVA-300 • Athos

**IMOVA-300 • Atlas**

Relax. delay 1.000 sec  
Pulse 45.0 degrees

Acq. time 3.764 sec  
Width 4707 E Hz

16 repetitions

OBSERVE H1, 299.8459062 MHz

DATA PROCESSING  
PT 4130 65536

**Total time 1 min, 16 sec**

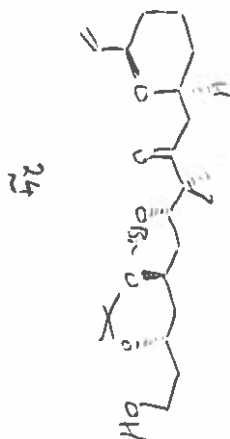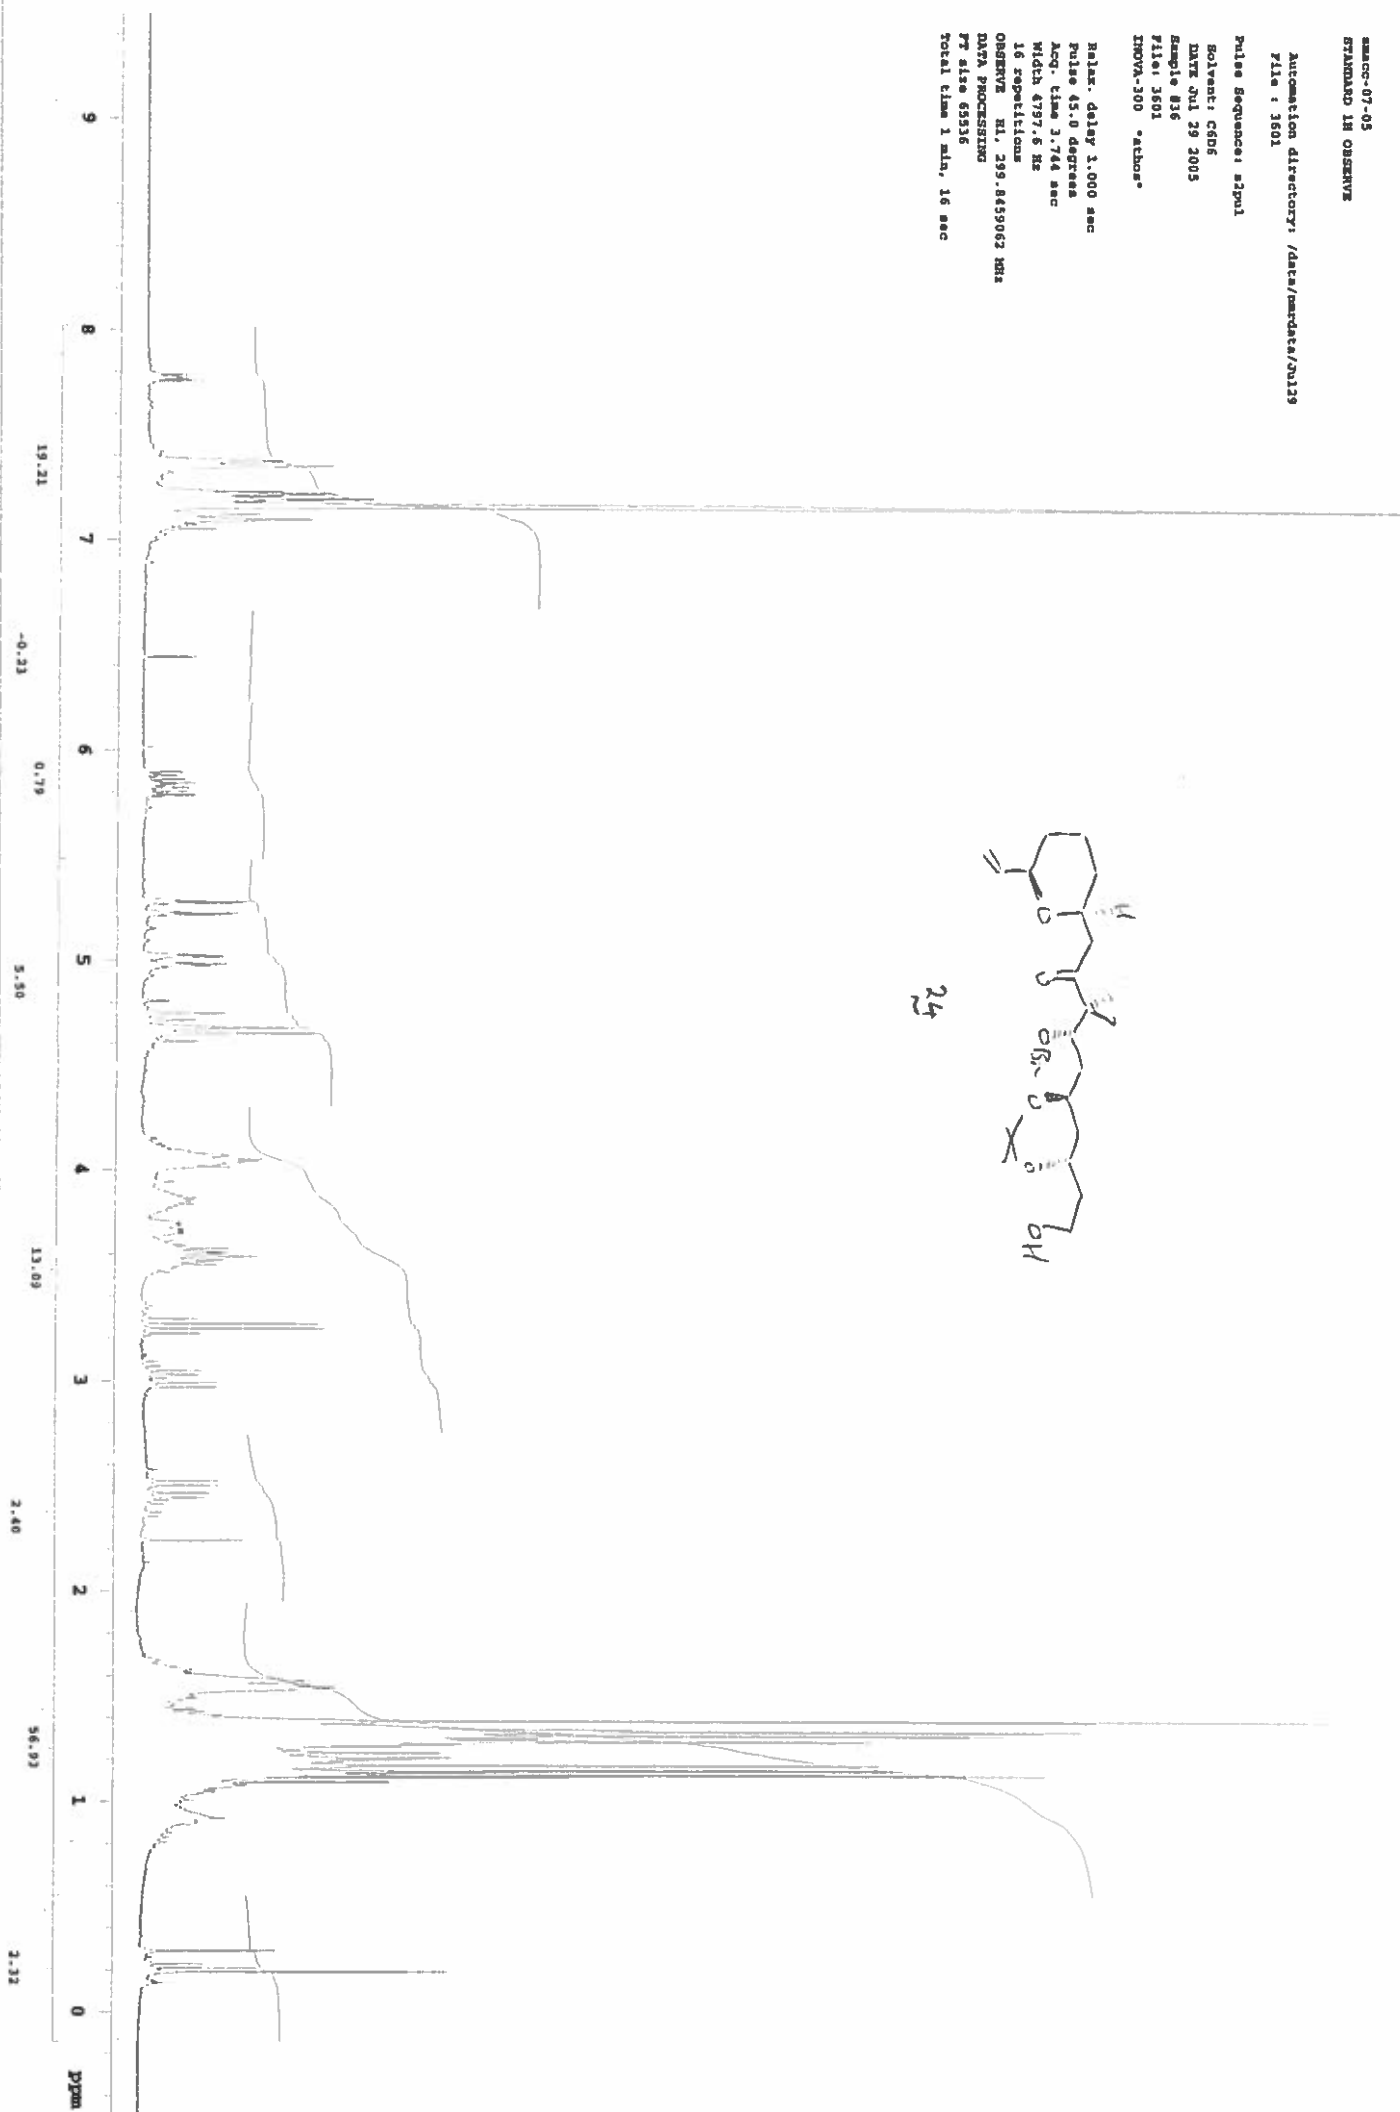

smac-07-05  
STANDARD IS OBSERVE

Automation directory: /data/rawdata/01129  
File: 3602

Pulse Sequence: zgpg1

Solvent: CDCl<sub>3</sub>

Date: Jul 29 2005

Sample: 836

File: 3602

INSTR: 300 MHz

PROB: 1H/13

Pulse delay: 1.000 sec

Pulse: 45.0 degrees

Acq. time: 1.815 sec

Width: 18850.1 Hz

256 Repetitions

OBSERVE: CH3, 75.362951 MHz

DECOUPLE: H1, 299.8474056 MHz

Power: 37 dB

Continuously on

WALTZ-16 modulated

DATA PROCESSING

Line broadening: 1.0 Hz

FT size: 131072

Total time: 12 min, 2 sec

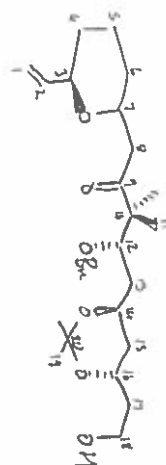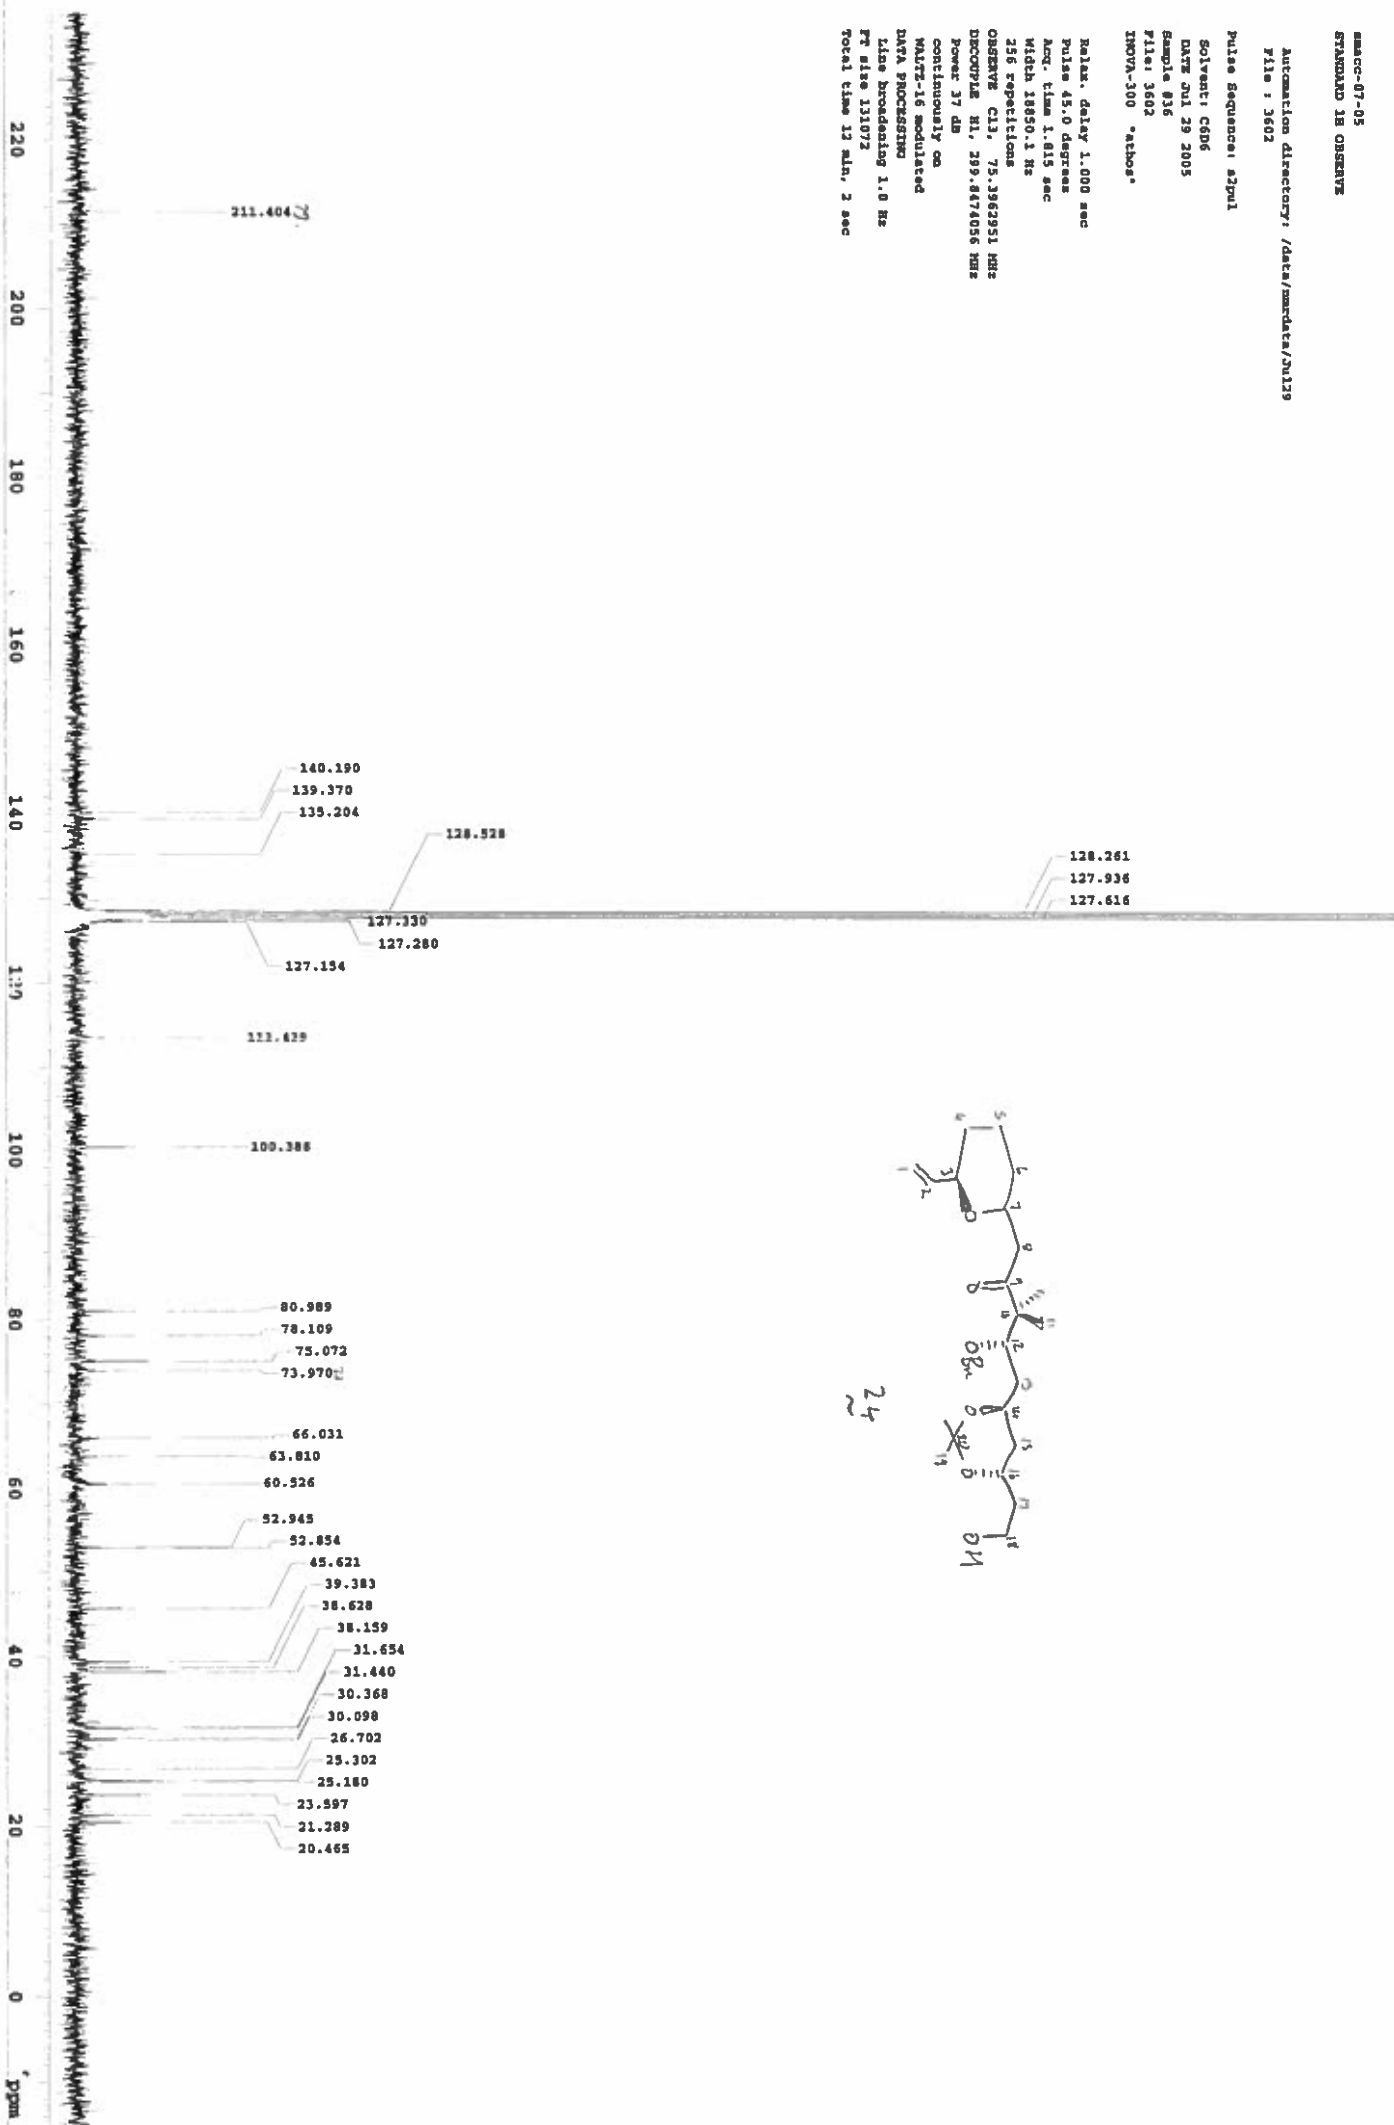

smacc-06-55  
STANDARD IR OBSERVE

Automation directory: /data/mrdata/2un06  
File: 1104

Pulse Sequence: zgpg1  
Solvent: CDCl<sub>3</sub>  
Date: Jun 7 2005  
Sample #11  
File: 1104  
INOVA-300 "runcy"

Relax. delay 1.000 sec  
Pulse 45.0 degrees  
Acq. time 3.744 sec  
Width 4797.6 Hz  
16 repetitions  
OBSERVE H1, 299.045062 MHz  
DATA PROCESSING  
F2 size 65536  
Total time 1 min, 16 sec

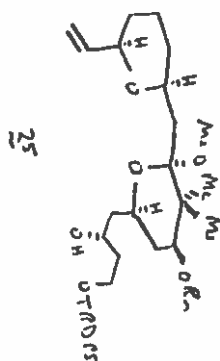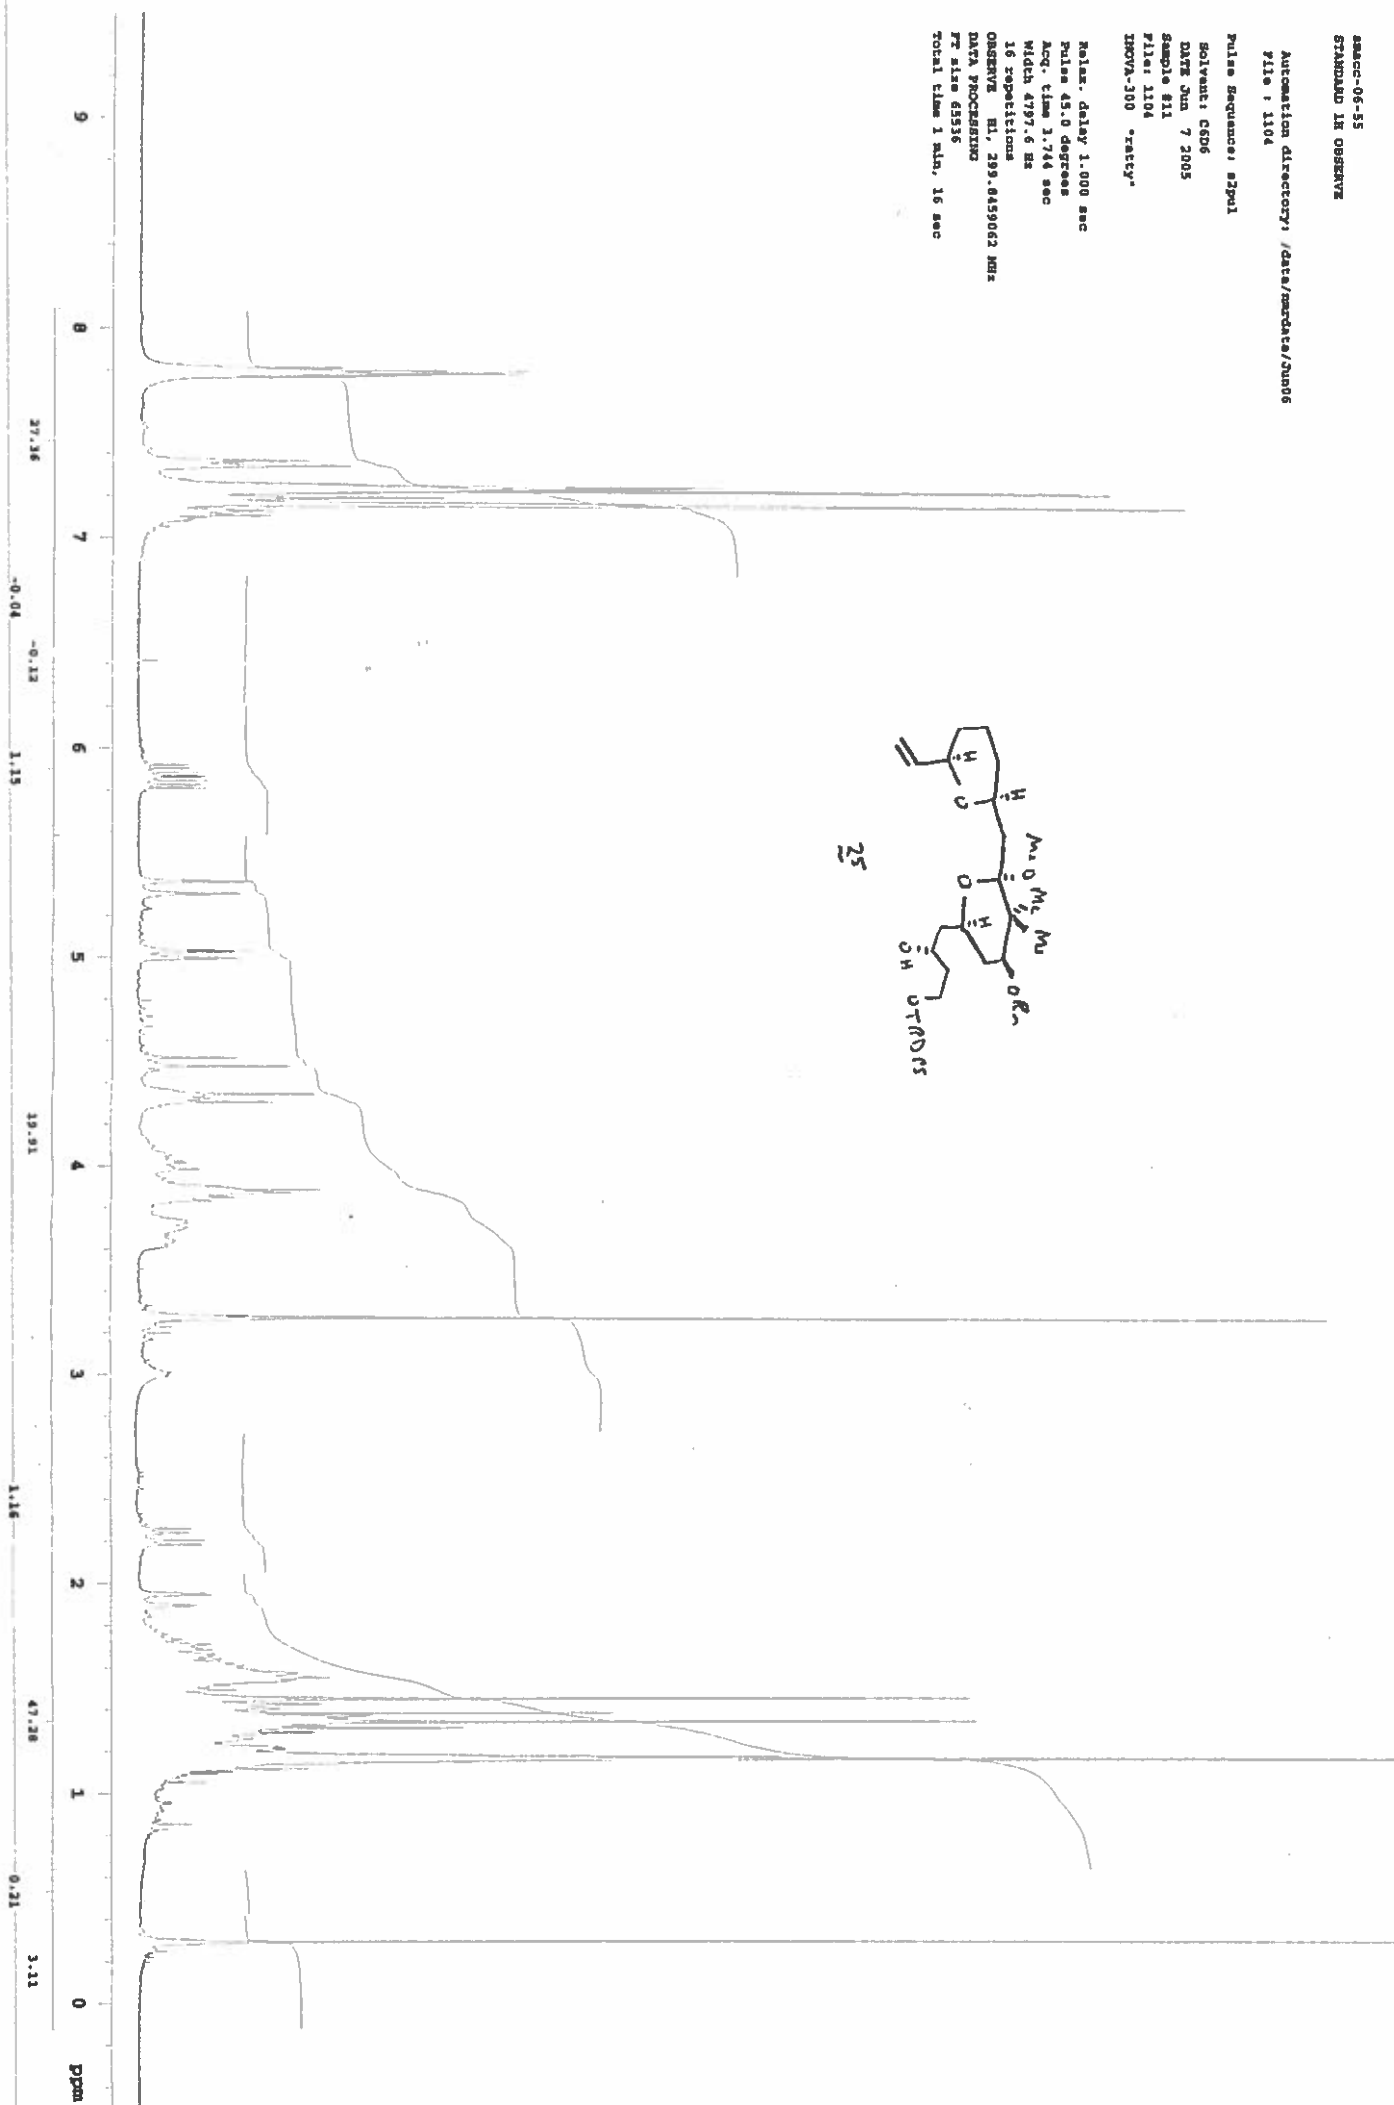

NAME: 07-05  
STANDARD: IS OBSERVE

Automation directory: /data/nmrdata/07129  
File: 3602

Pulse Sequence: zgpg30

Solvent: CF<sub>3</sub>CO<sub>2</sub>H

Date: Jul 29 2005

Sample: 836

File: 3602

INNOVA-100 "athos"

Relax. delay: 1.000 sec

Pulse: 45.0 degrees

Acq. time: 1.815 sec

Width: 10850.1 Hz

256 repetitions

OBSERVE: C13, 75.3962951 MHz

DECOUPLE: H1, 299.8474056 MHz

Power: 37 dB

continuously on

WALTZ-16 modulated

DATA PROCESSING

Line broadening: 1.0 Hz

FT size: 131072

Total time: 12 min, 2 sec

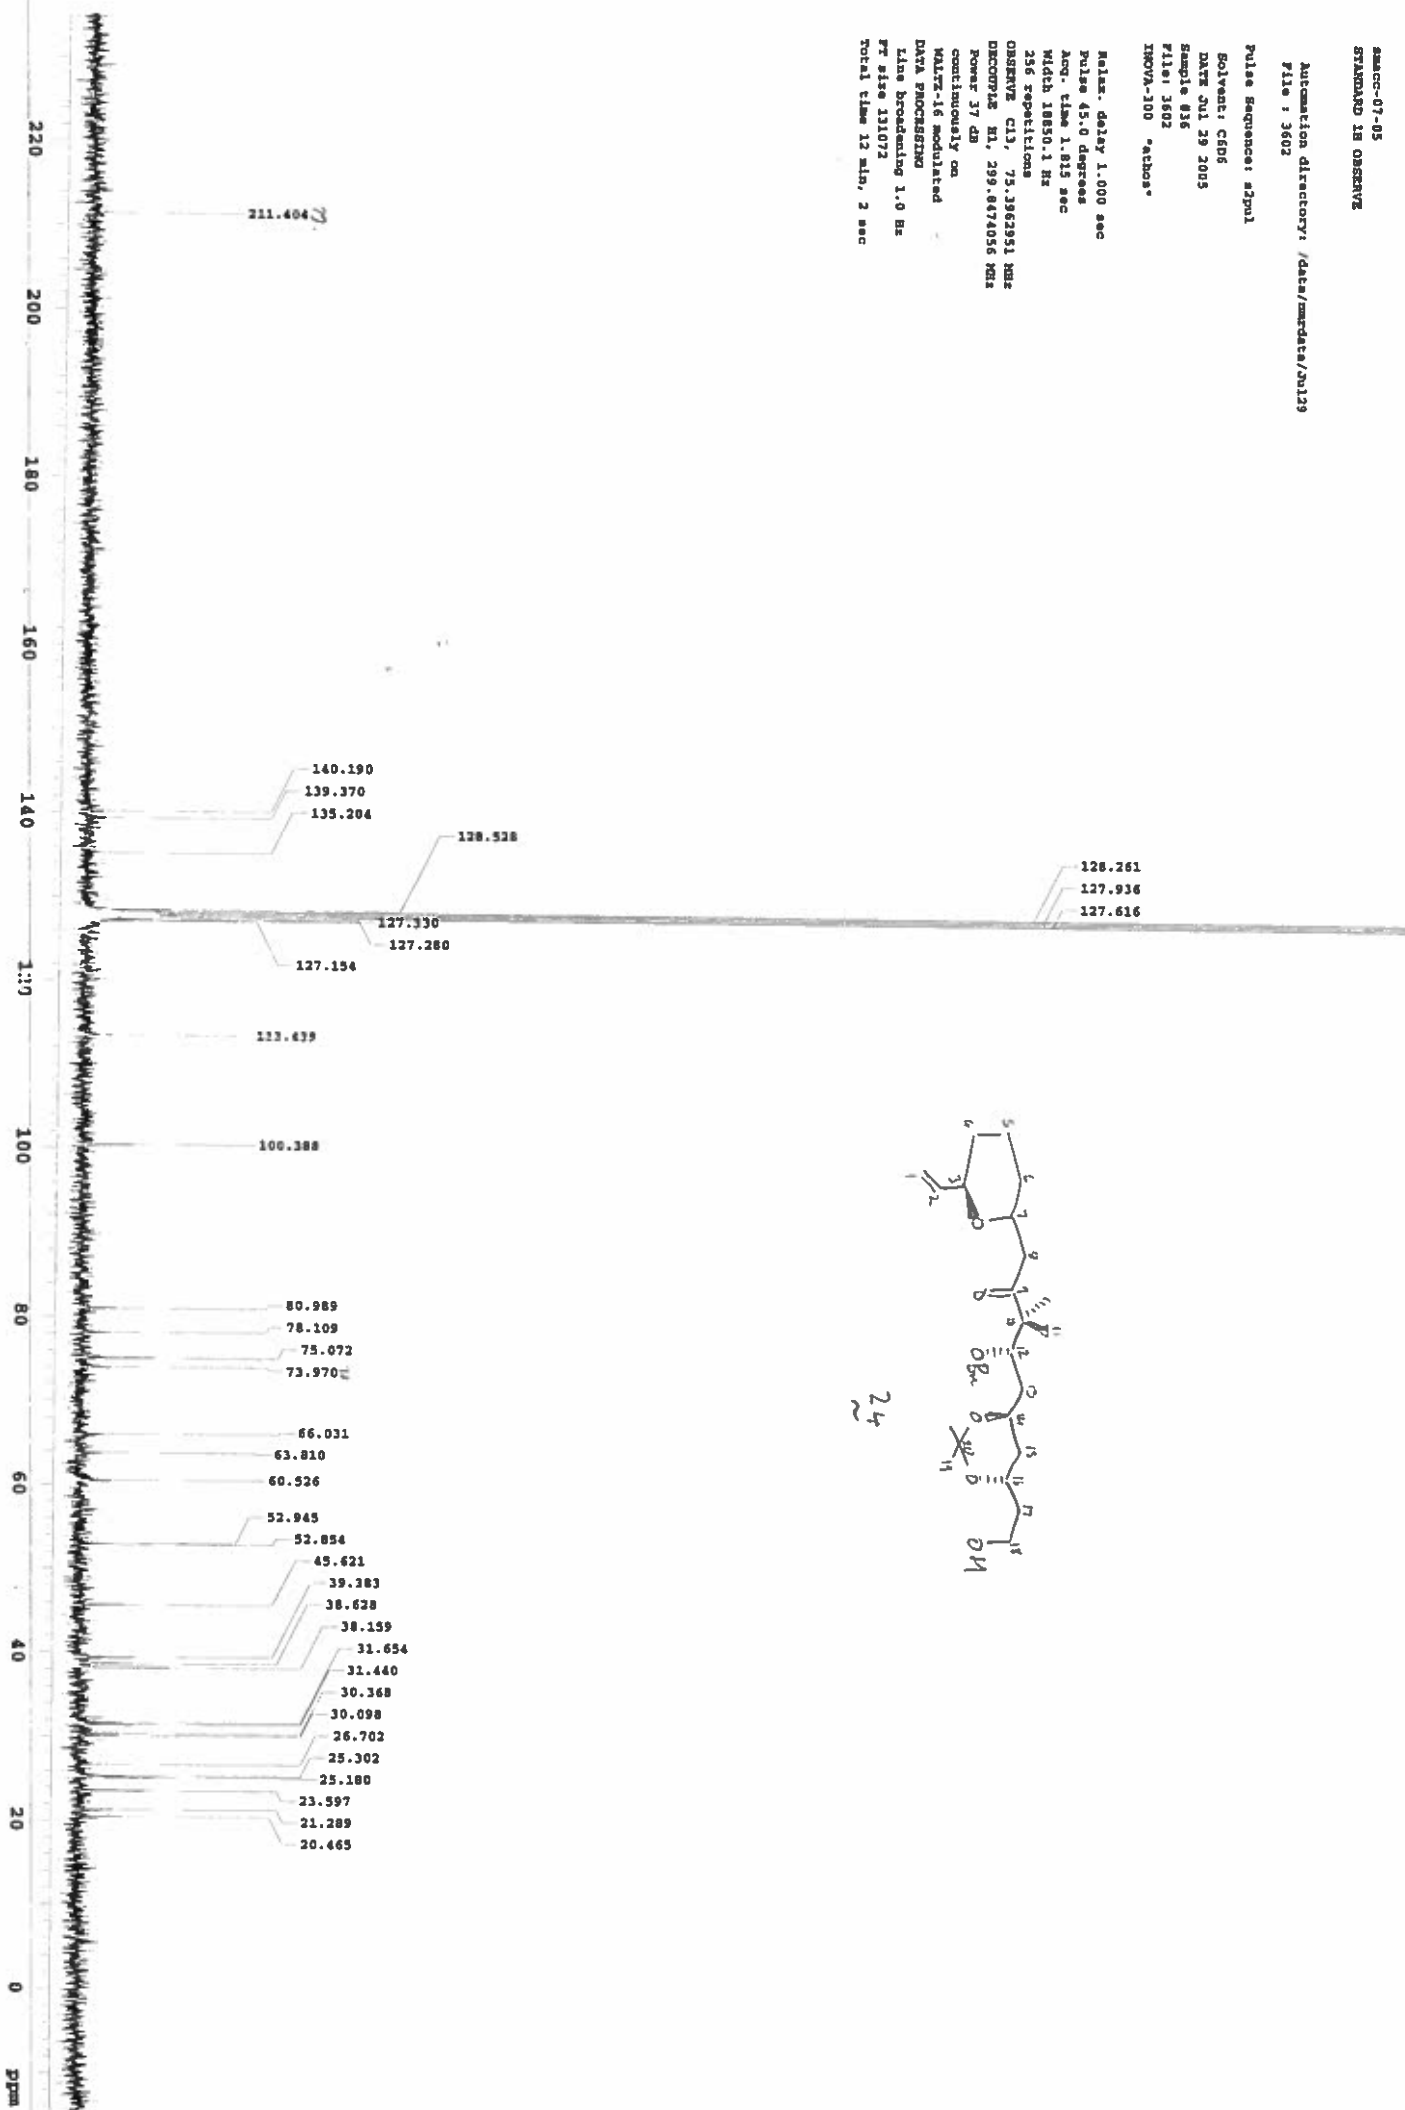

Automation directory: /data/omdata/2nd06  
File : 1105

Pulse Sequence: zgpg30

Solvent: CDCl<sub>3</sub>  
Date: Jun 7 2005  
Sample: 811  
File: 1105  
INSTR: 300 "rtecy"

Pulse delay: 1.000 sec  
Pulse: 45.0 degrees  
Acq. time: 1.815 sec  
Width: 16850.1 Hz  
256 repetitions  
OBSERVE: C13, 75.3962951 MHz  
DECOUPLE: H1, 299.8474056 MHz  
Power: 37 dB  
continuously on  
MAGNET: 16 modulated  
DATA PROCESSING  
Line broadening: 1.0 Hz  
FT size: 131072  
Total time: 12 min, 2 sec

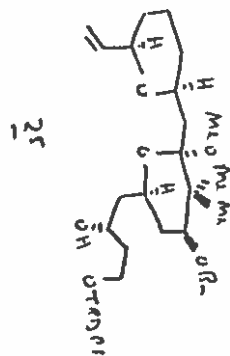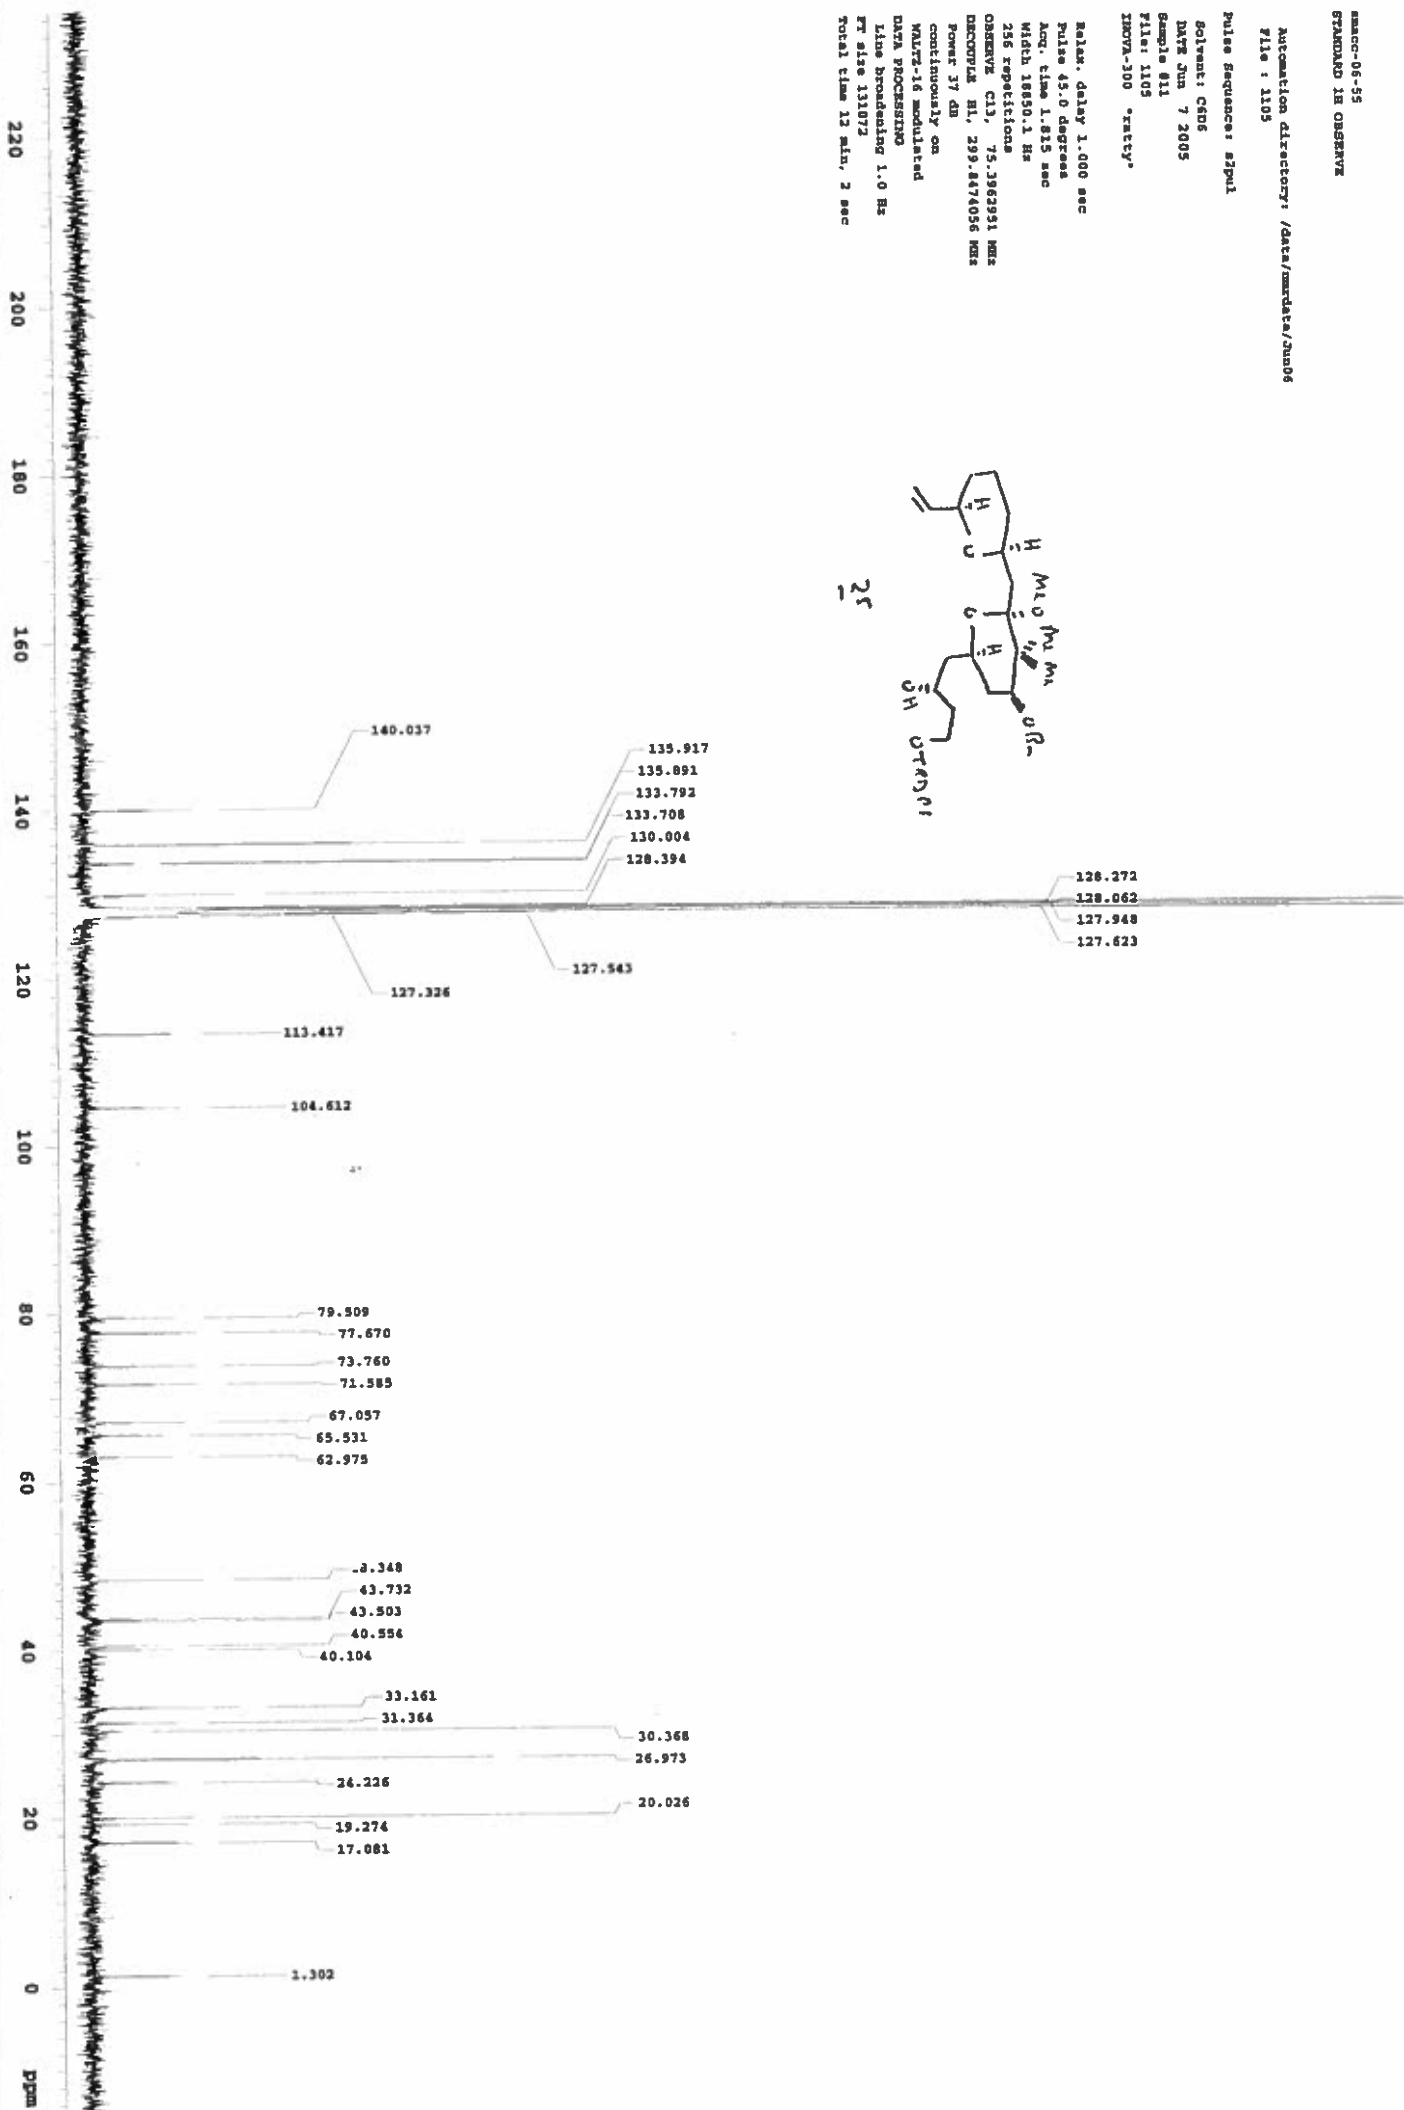

smac-06-65  
STANDARD 1H OBSERVE

Automation directory: /data/nucldata/jun12  
File: 1302

Pulse Sequence: zgpg30

Solvent: CDCl<sub>3</sub>

DATE: Jun 23 2005

Sample: 813

File: 1302

INSTR: spect

Pulse delay: 1.000 sec

Pulse: 45.0 degrees

Acq. time: 3.744 sec

Width: 4797.6 Hz

12 repetitions

OBSERVE: H1, 299.8459062 MHz

DATA PROCESSING

FF: also 65536

Total time: 3 min, 32 sec

27

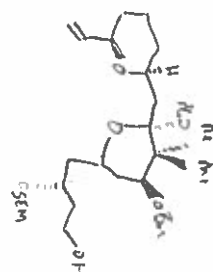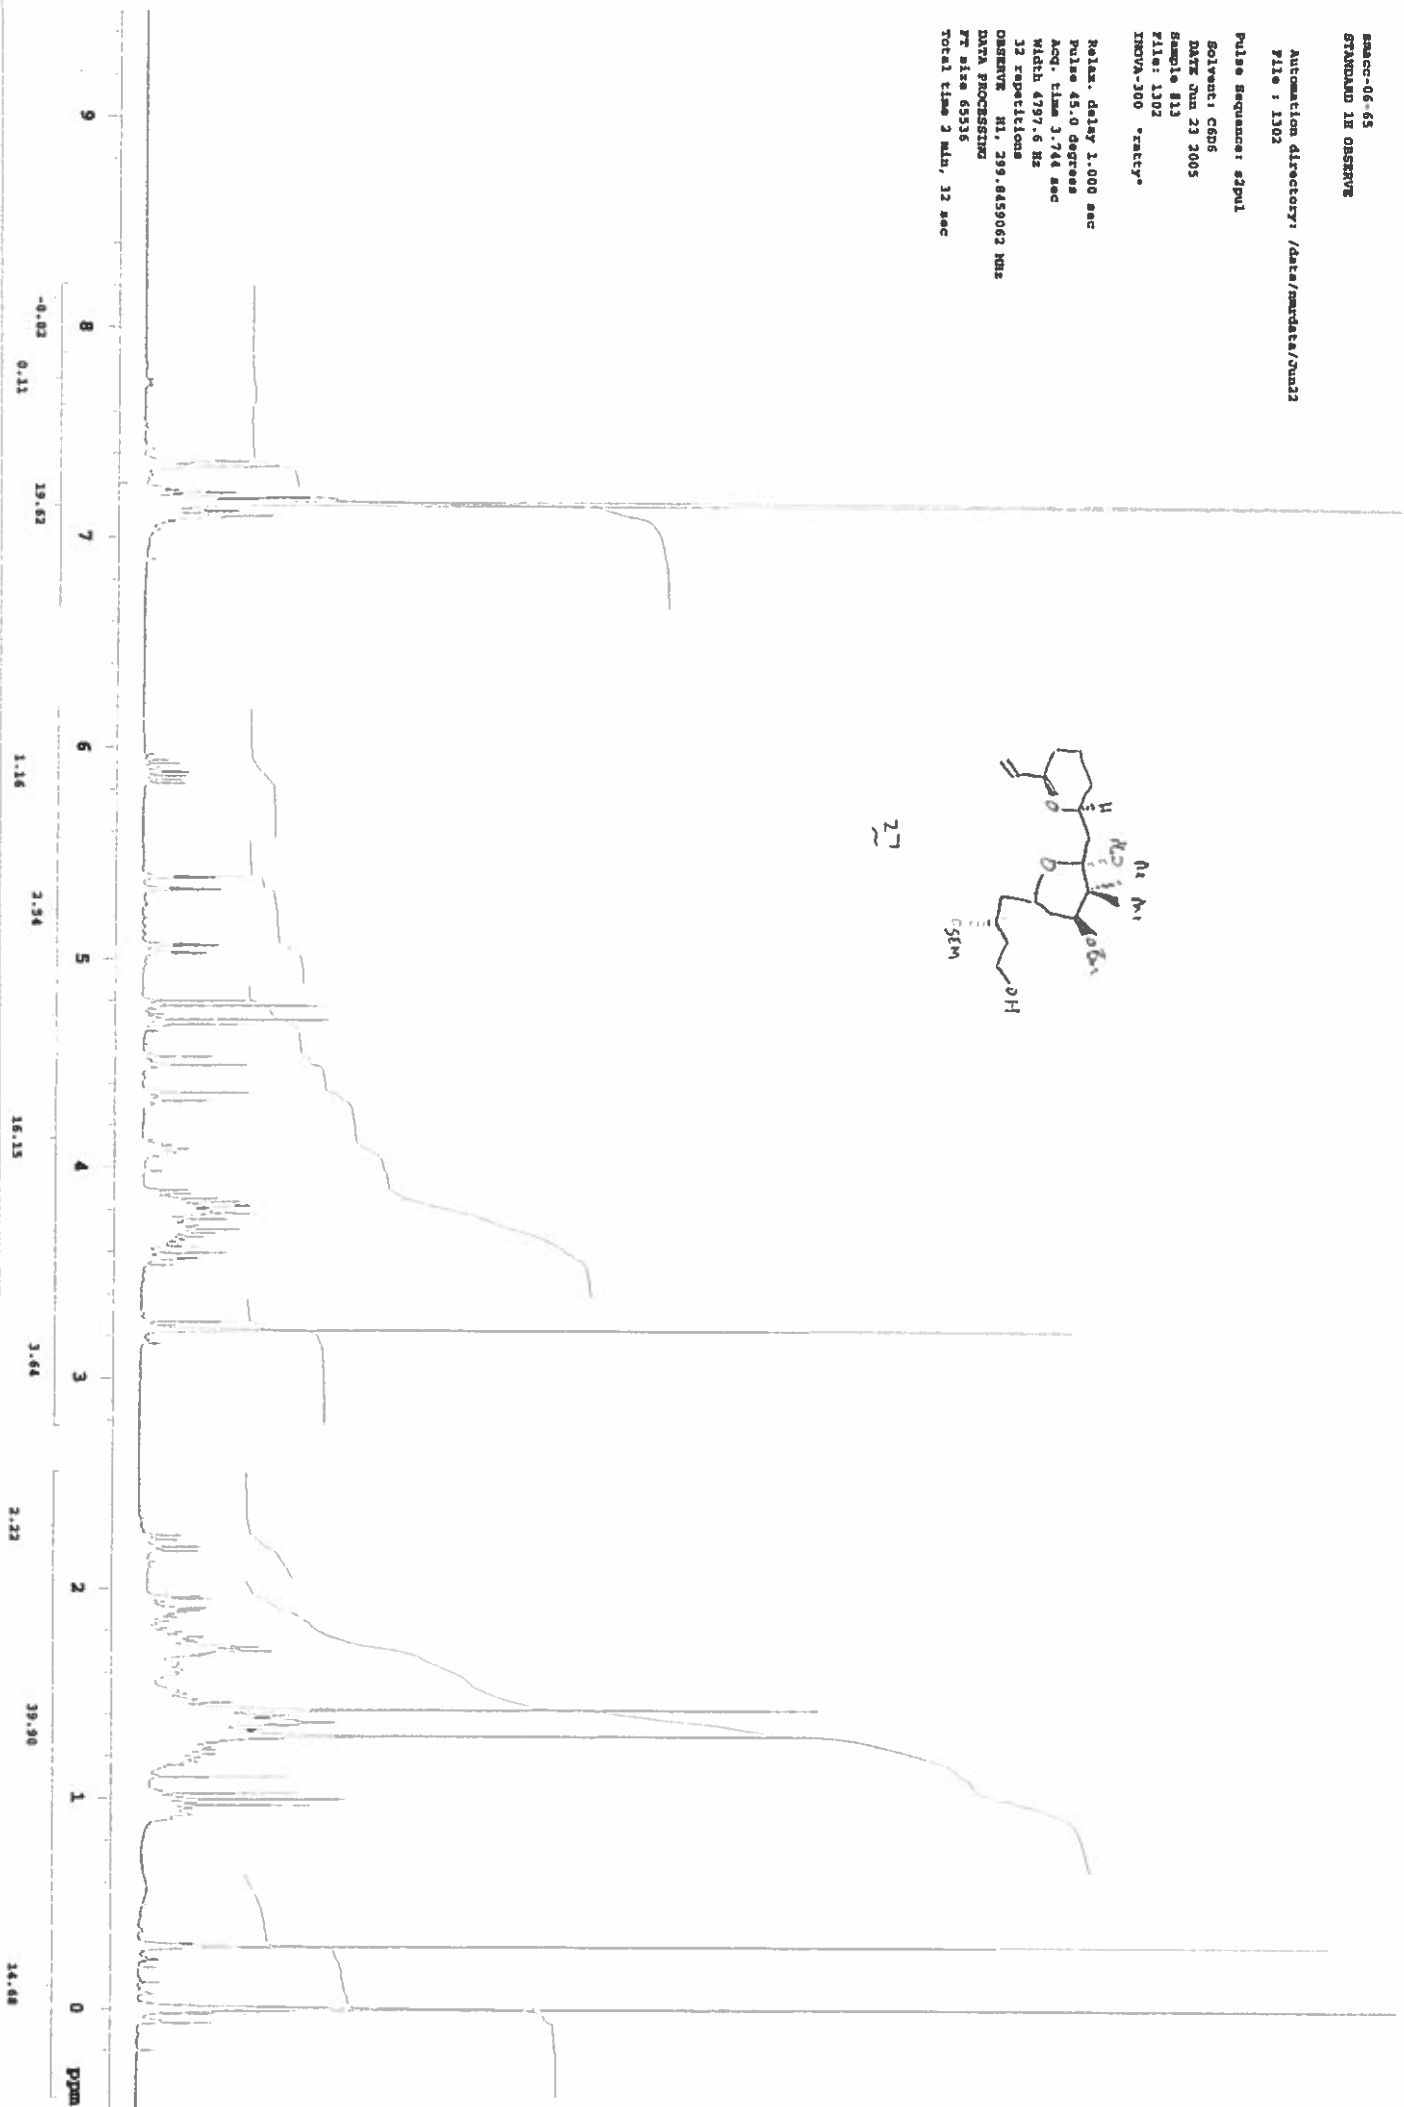

smac-06-65  
STANDARD IR OBSERVE

Automation directory: /data/smldata/2002  
File: 1103

Pulse sequence: zgpg  
Solvent: C6D6  
Date: Jun 23 2005  
Sample #13  
File: 1103  
INOVA-100 "ratty"

Relax. delay 1.000 sec  
Pulse 45.0 degrees  
Acq. time 1.815 sec  
Width 18850.1 Hz  
1024 repetitions  
OBSERVE C13, 75.3062951 MHz  
DECOUPLE H1, 299.8474036 MHz  
Power 37 dB  
continuously on  
WALTZ-16 modulated  
DATA PROCESSING  
Line broadening 1.0 Hz  
FT size 111072  
Total time 48 min, 11 sec

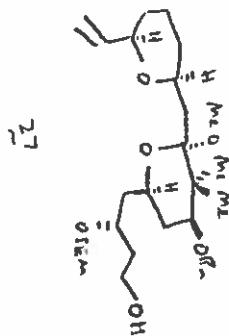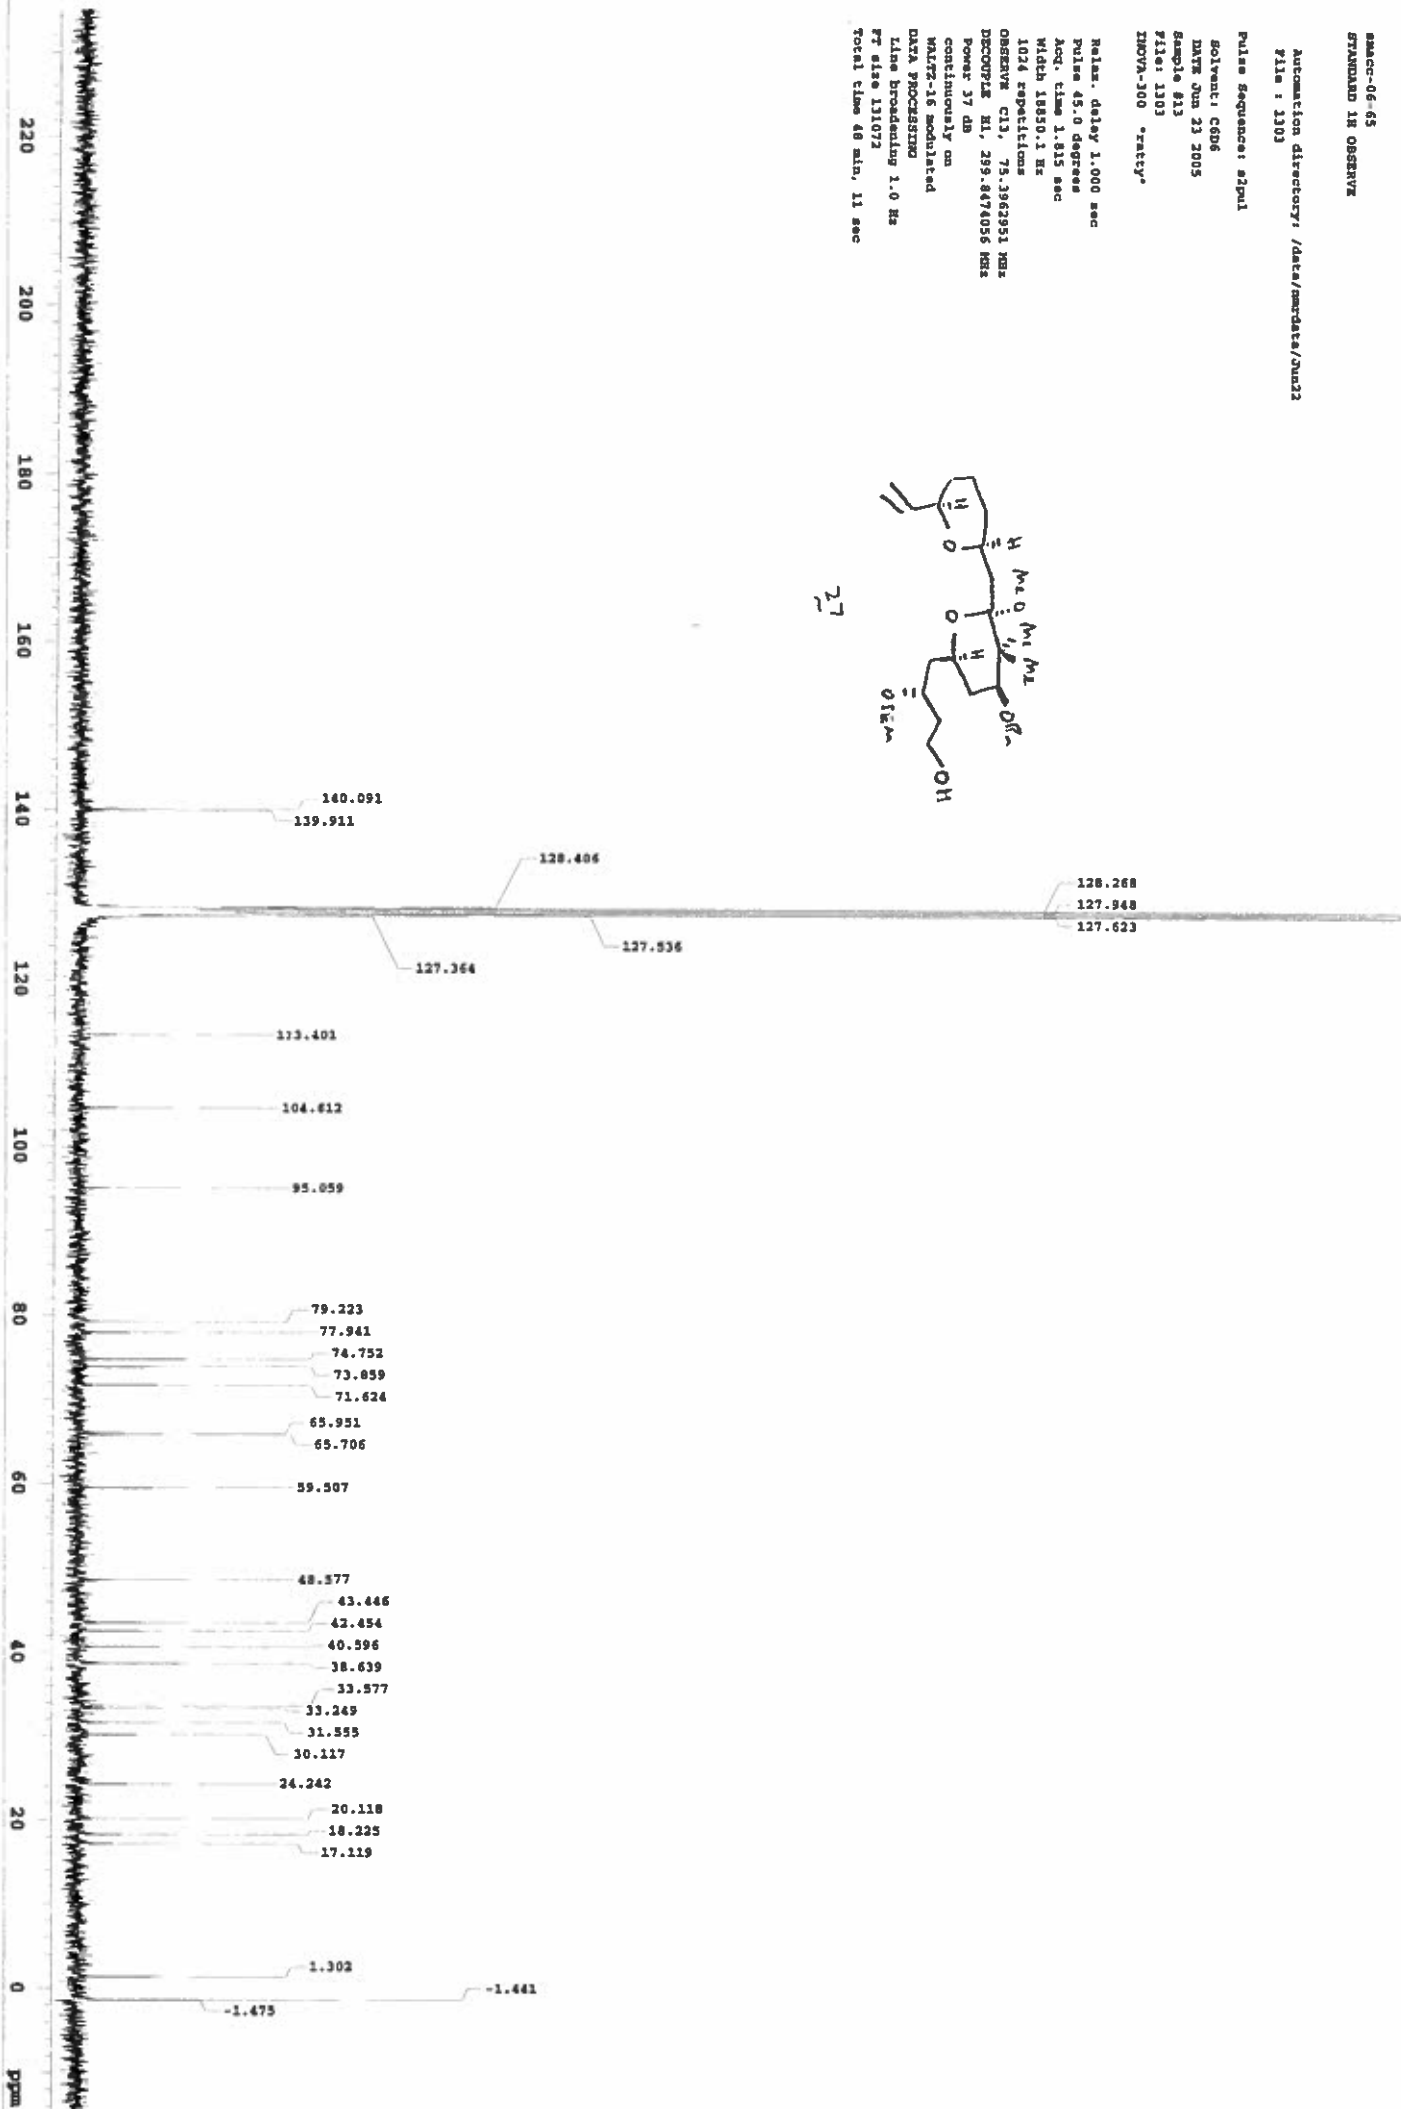



c:\9 593  
STANDARD 1H OBSERVE

Automation directory: /data/nmrdata/mar09  
File : 0102

Pulse Sequence: zgpg30

Solvent: cdcl3  
Date Mar 9 2005  
Sample 83  
File: 0102  
INOVA-300 "athos"

Relax. delay 1.000 sec  
Pulse 45.0 degrees  
Acq. time 1.764 sec  
Width 2978.4 Hz  
16 repetitions  
OBSERVE H1, 299.8458792 MHz  
DATA PROCESSING  
F2 size 32768  
Total time 1 min, 16 sec

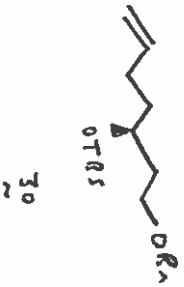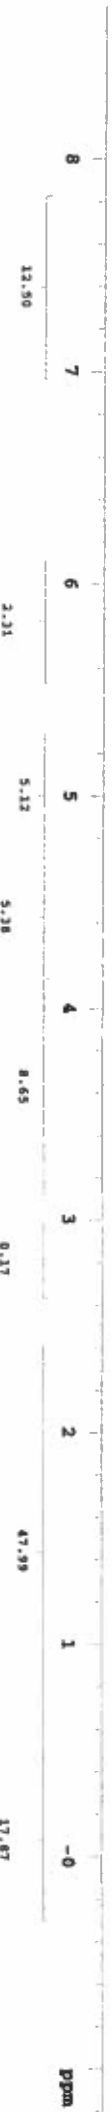

13C OBSERVE

pad-2 run with finda0 before acquisition

Automation directory: /data/metadata/Jun15  
File: 4301

Pulse Sequence: zgpg30

Solvent: CDCl3

DATE: Jun 15 2005

Sample: 843

File: 4301

INSTRUMENT: spect

Relax. delay: 1.000 sec

Pulse: 45.0 degrees

Acq. time: 1.815 sec

Width: 18850.1 Hz

256 repetitions

OBSERVE: c13, 75.3962883 MHz

DECOUPLE: H1, 299.8473786 MHz

Power: 17 dB

Continuously on

WALTZ-16 modulated

DATA PROCESSING

Line broadening: 1.0 Hz

FT size: 131072

Total time: 13 min, 2 sec

Handwritten notes: *60*, *30*, *OTB*

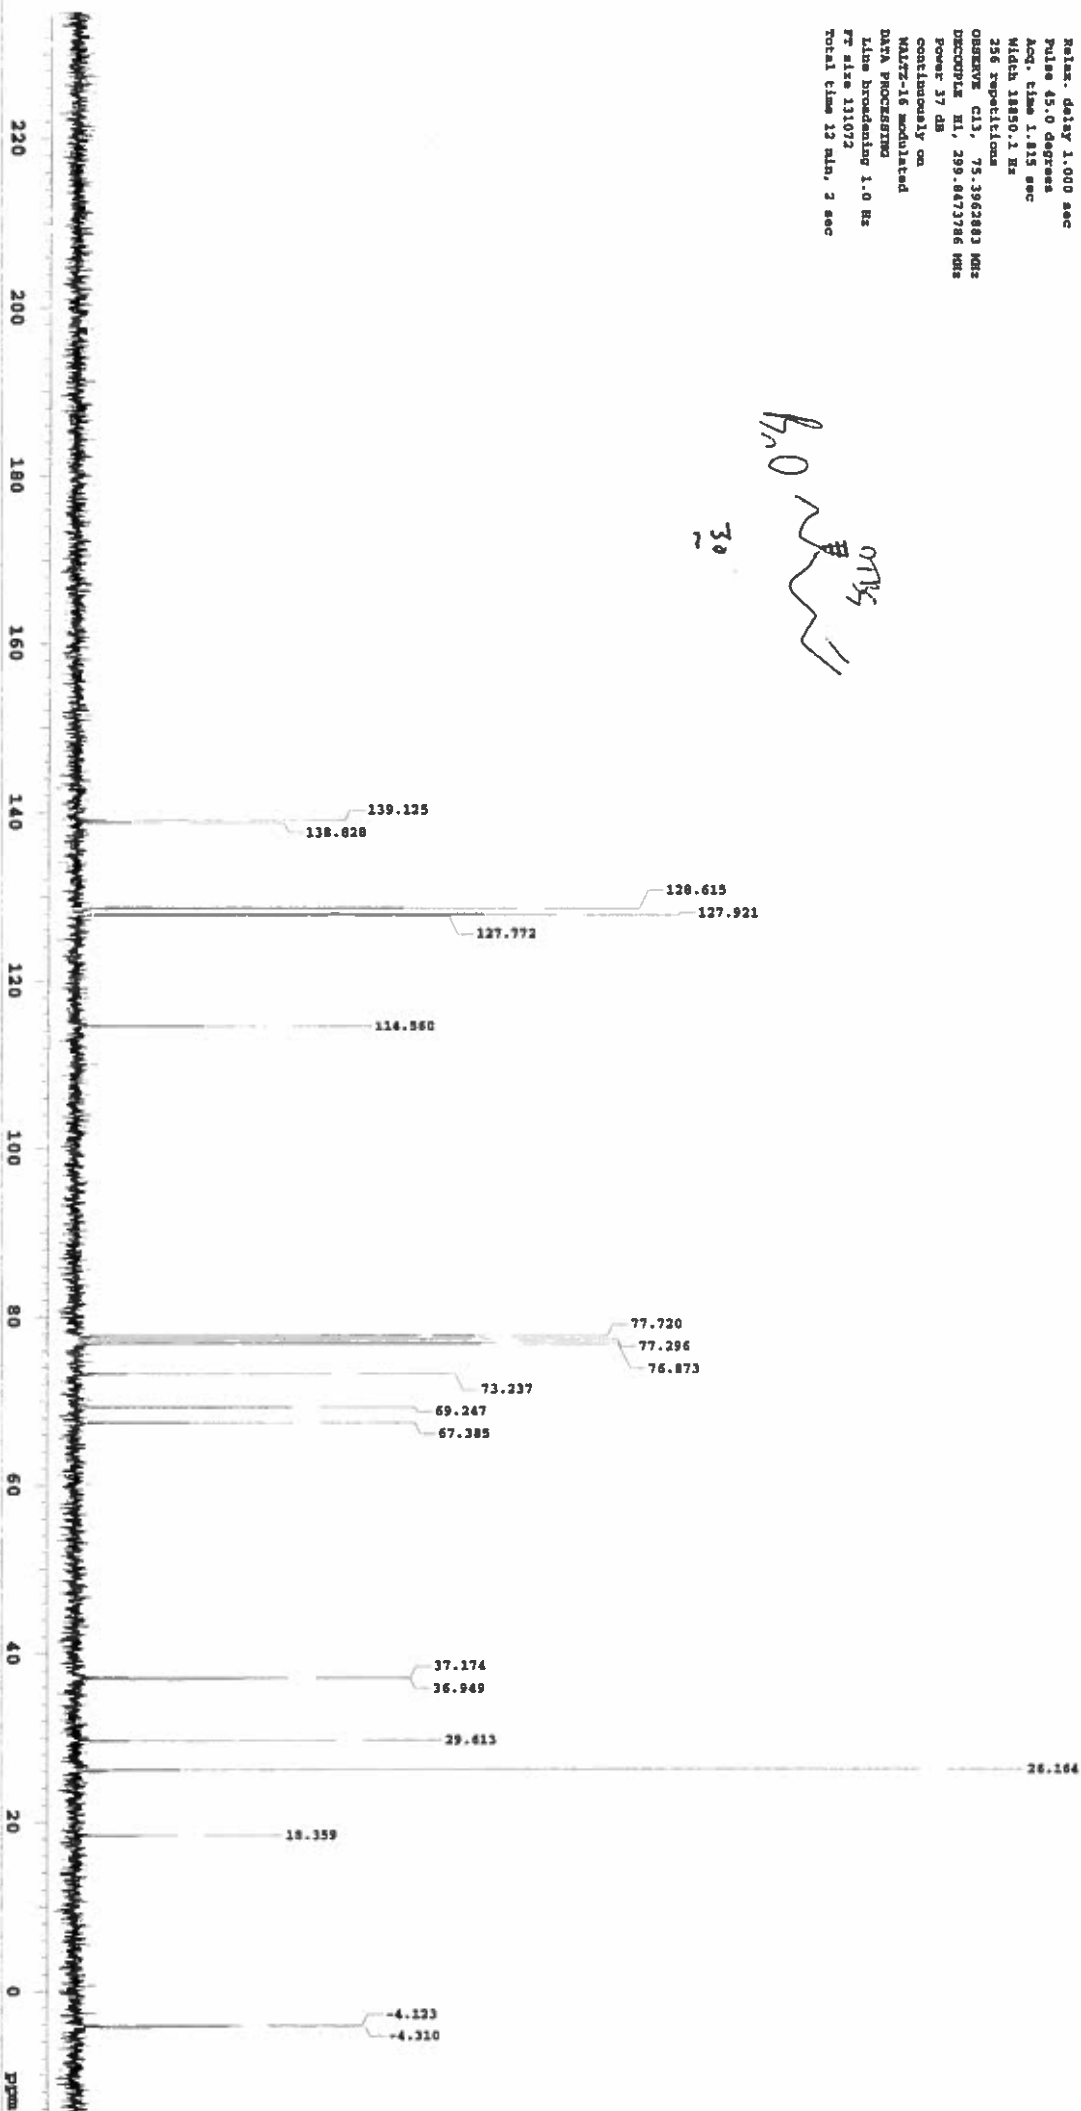

c:\g 609 c  
STANDARD 1B OBSERVE

Automation directory: /data/mrdata/Apr18  
File : 2702

Pulse Sequence: zgpg30  
Solvent: CDCl3  
Date: Apr 18 2005  
Sample: 827  
File: 2702  
INOVA-300 "ratty"

Pulse delay: 1.000 sec  
Pulse: 45.0 degrees  
Acq. time: 3.744 sec  
Width: 3061.7 Hz  
16 repetitions  
OBSERVE: H1, 299.8459063 MHz  
DATA PROCESSING  
FT size: 32768  
Total time: 1 min, 16 sec

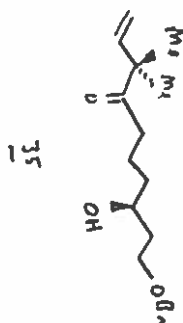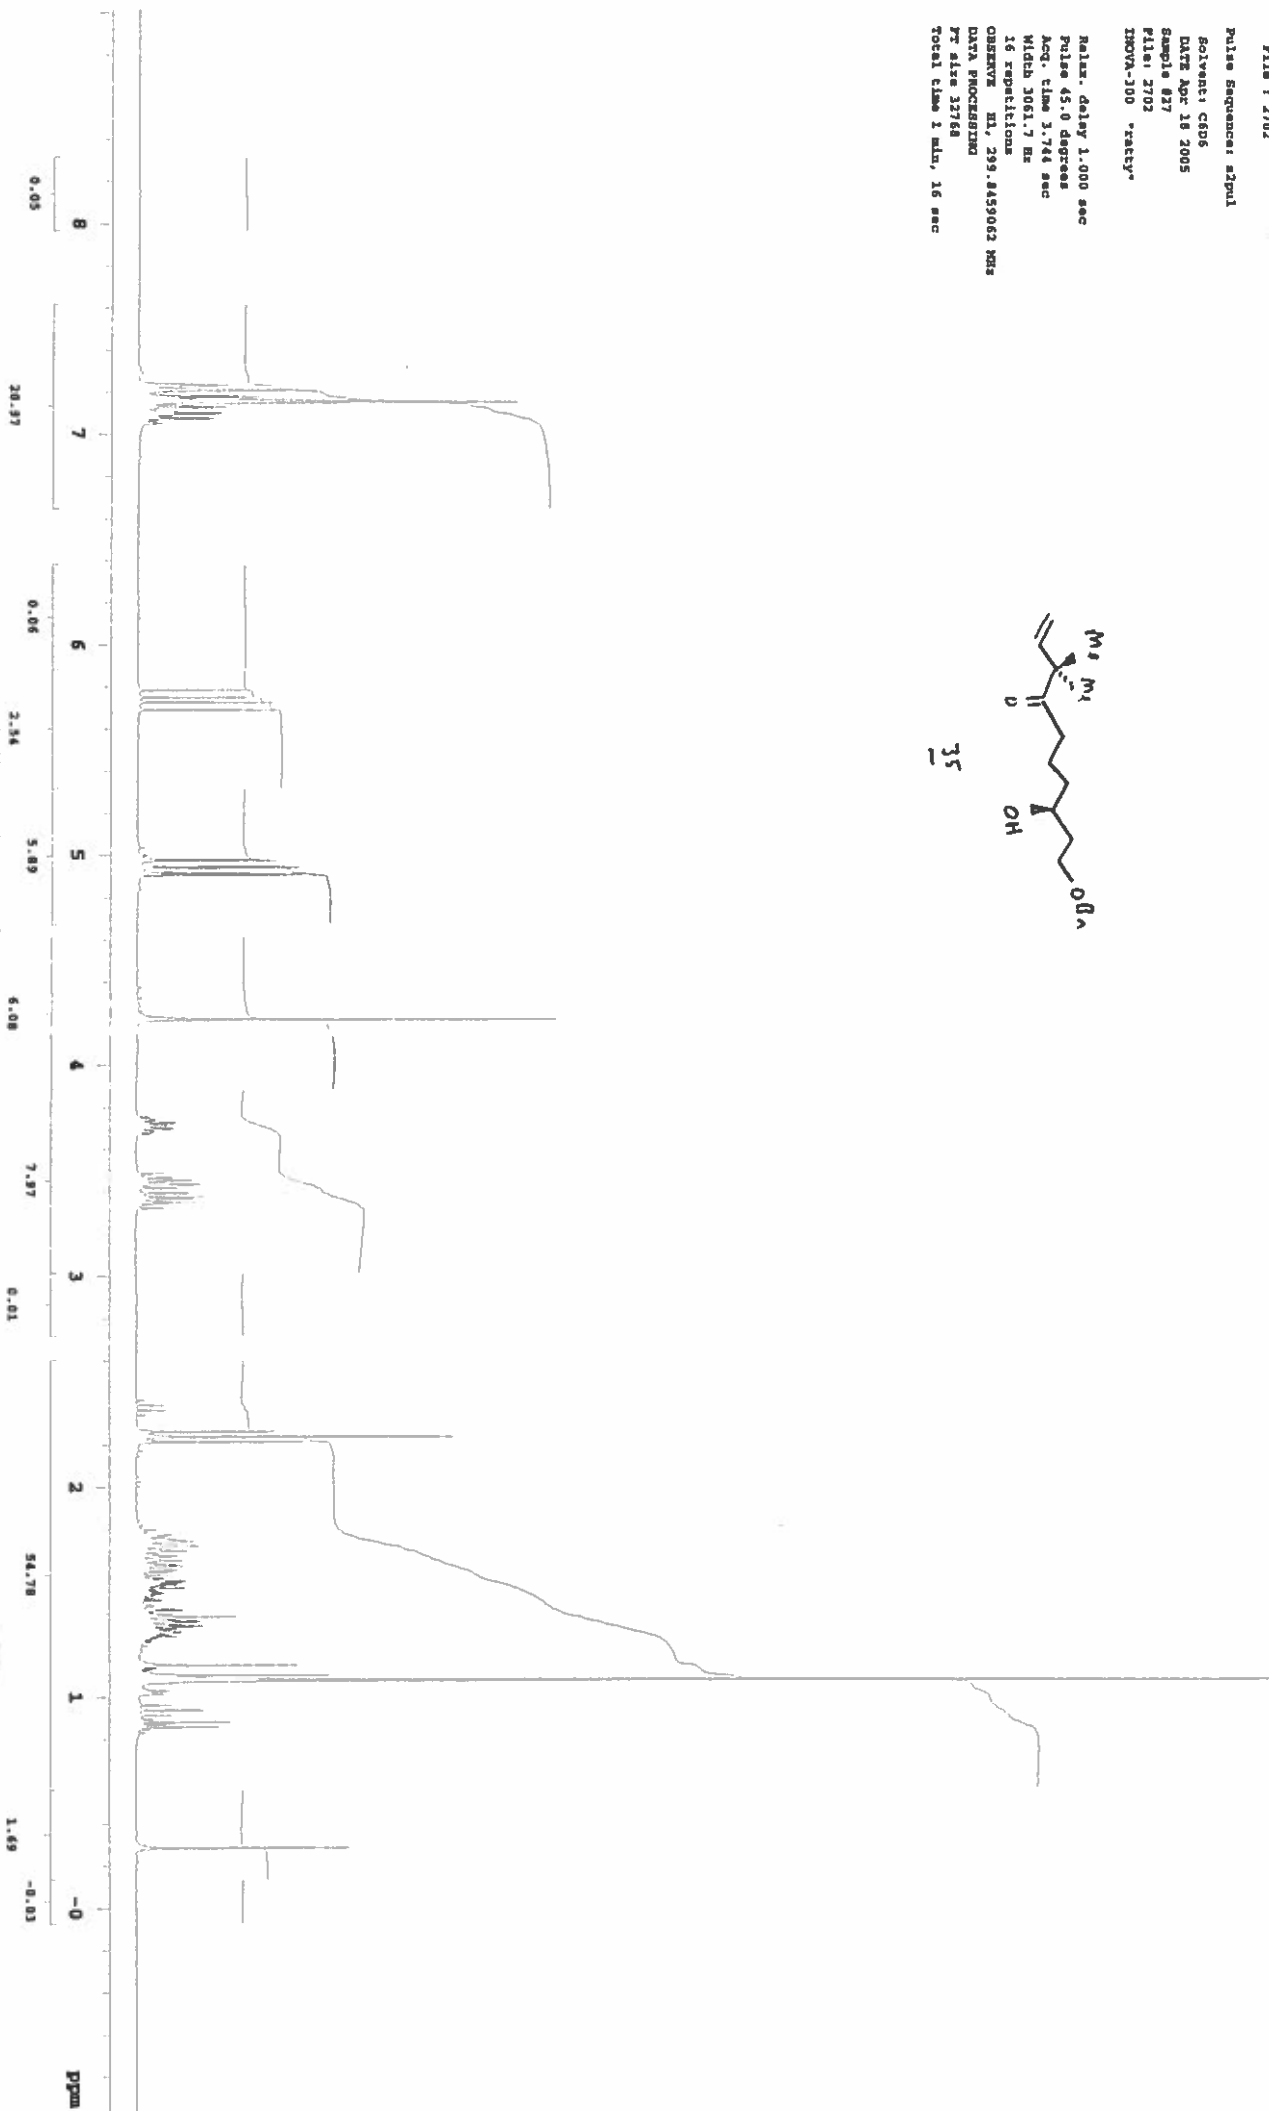

Pulse delay 1.000 sec  
 Pulse 45.0 degrees  
 Acc. time 1.01 sec  
 Width 18850.1 Hz  
 256 repetitions  
 OBSERVE CH1, 25.3663931 MHz  
 DECOUPLE H1, 259.8674038 MHz  
 Power 37 dB  
 continuously on  
 MALTZ-76 modulated  
 DATA PROCESSING  
 Line broadening 1.0 Hz  
 JT also 111072  
 Total time 17 min. 3 sec

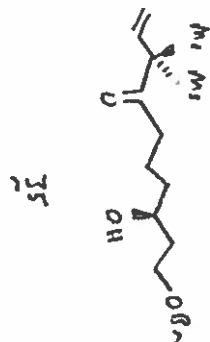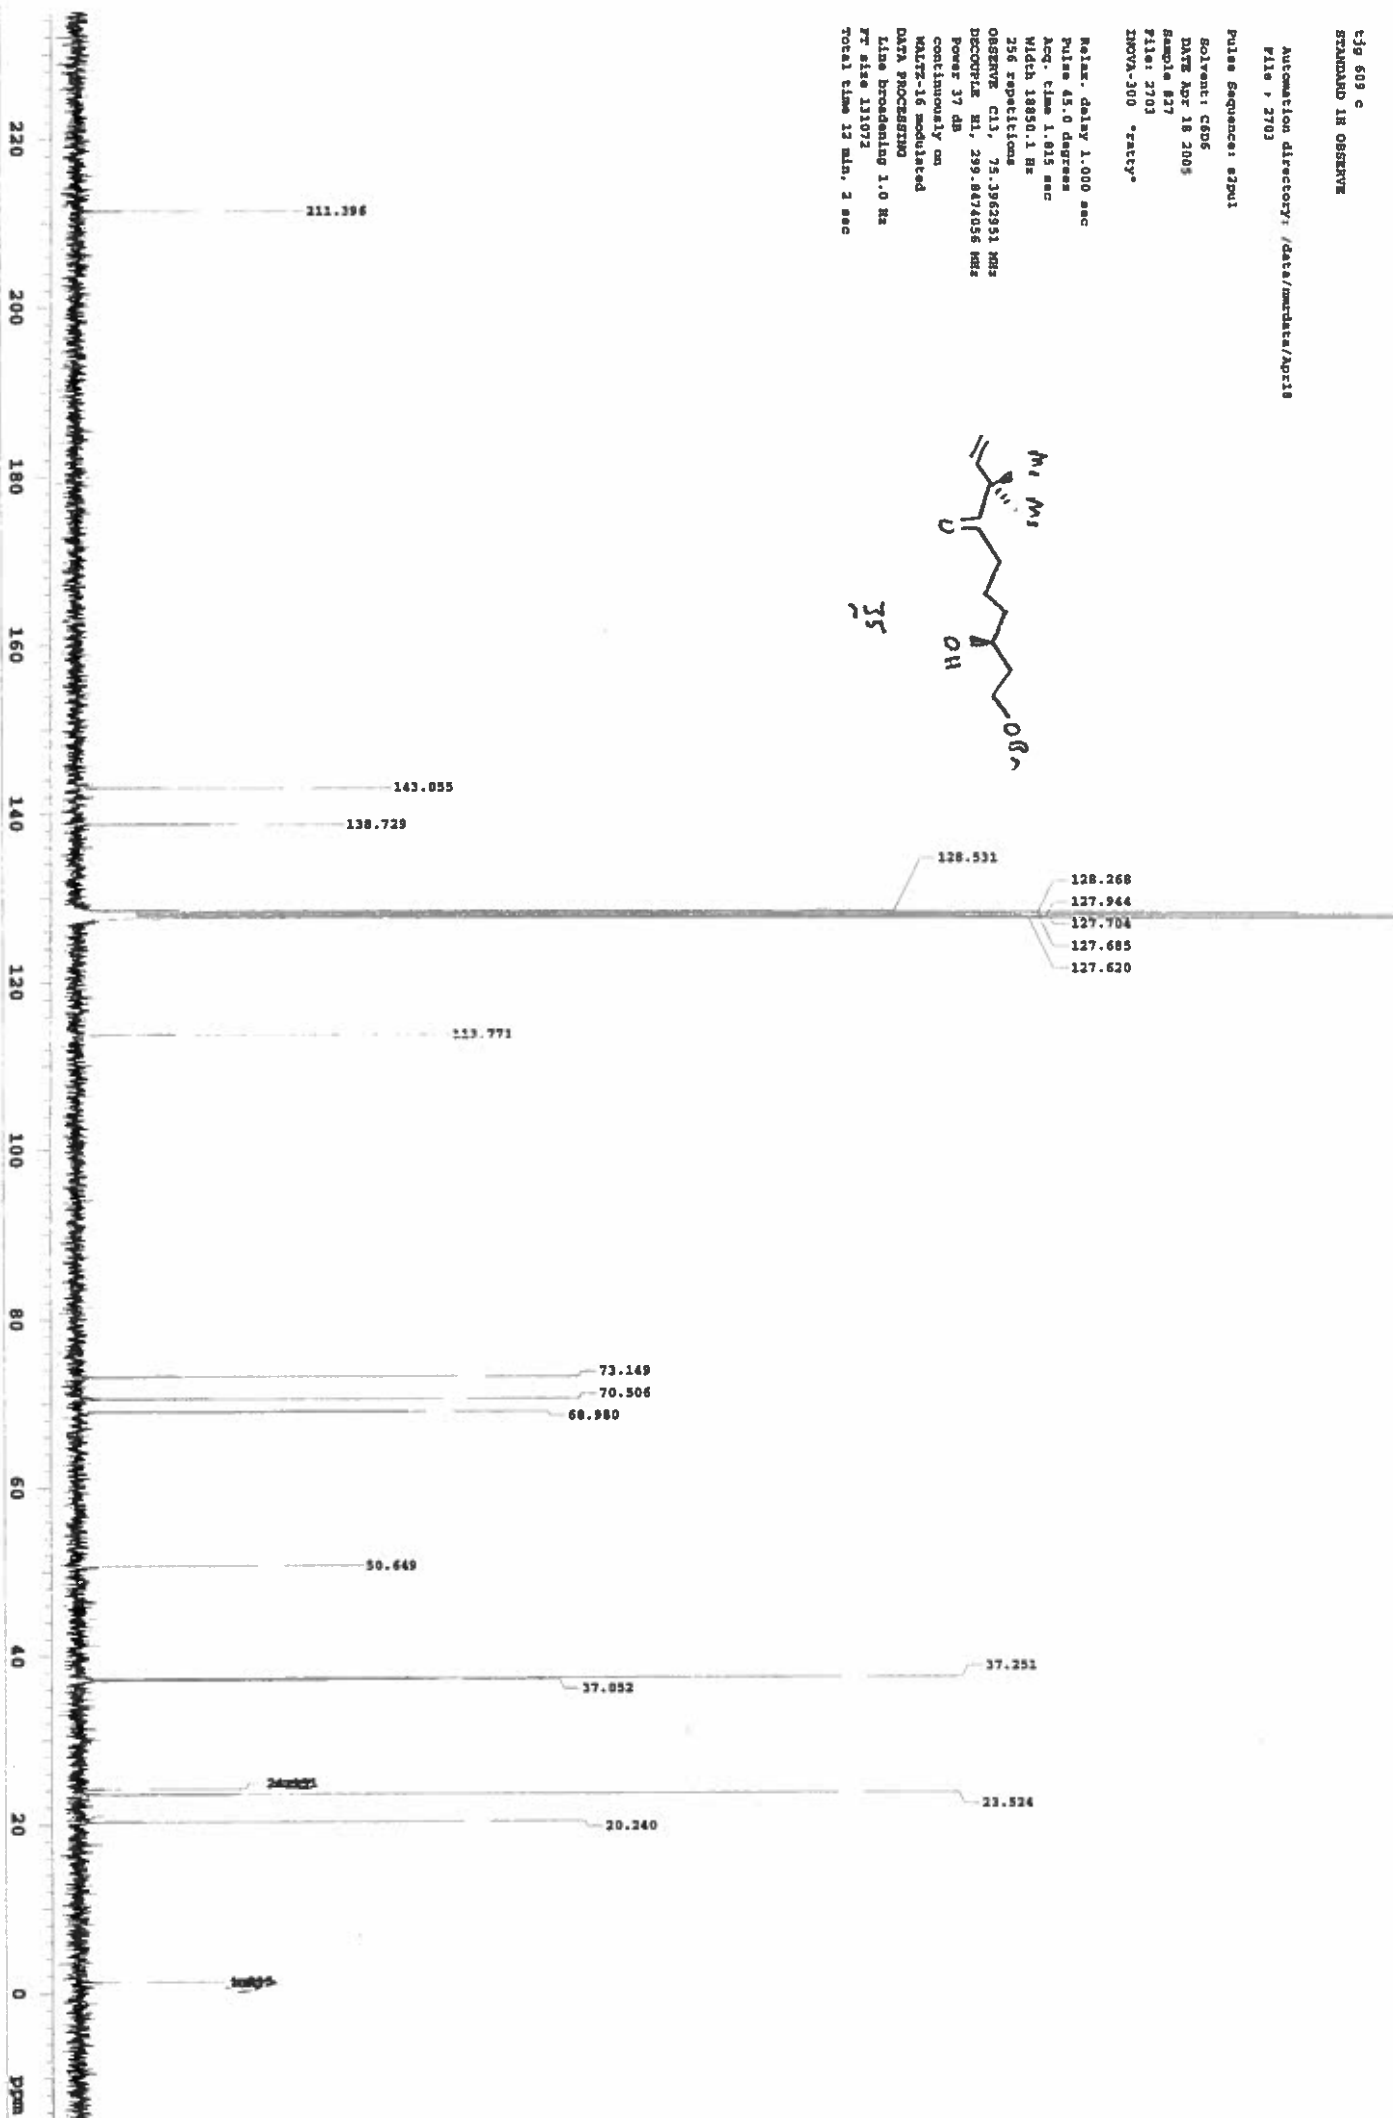

c:\g 609 a  
STANDARD IN OBSERVE

Automation directory: /data/metadata/ADP18  
File: 2501

Pulse sequence: zgpg30

Solvent: C6D6

DATE Acq: 18 2005

Sample: 825

File: 2501

INSTR: spect

Relax. delay: 1.000 sec

Pulse: 45.0 degrees

Acq. time: 3.74 sec

Width: 4797.6 Hz

16 repetitions

OBSERVE: H1, 299.8459062 MHz

DATA PROCESSING

FT size: 65536

Total time: 1 min, 15 sec

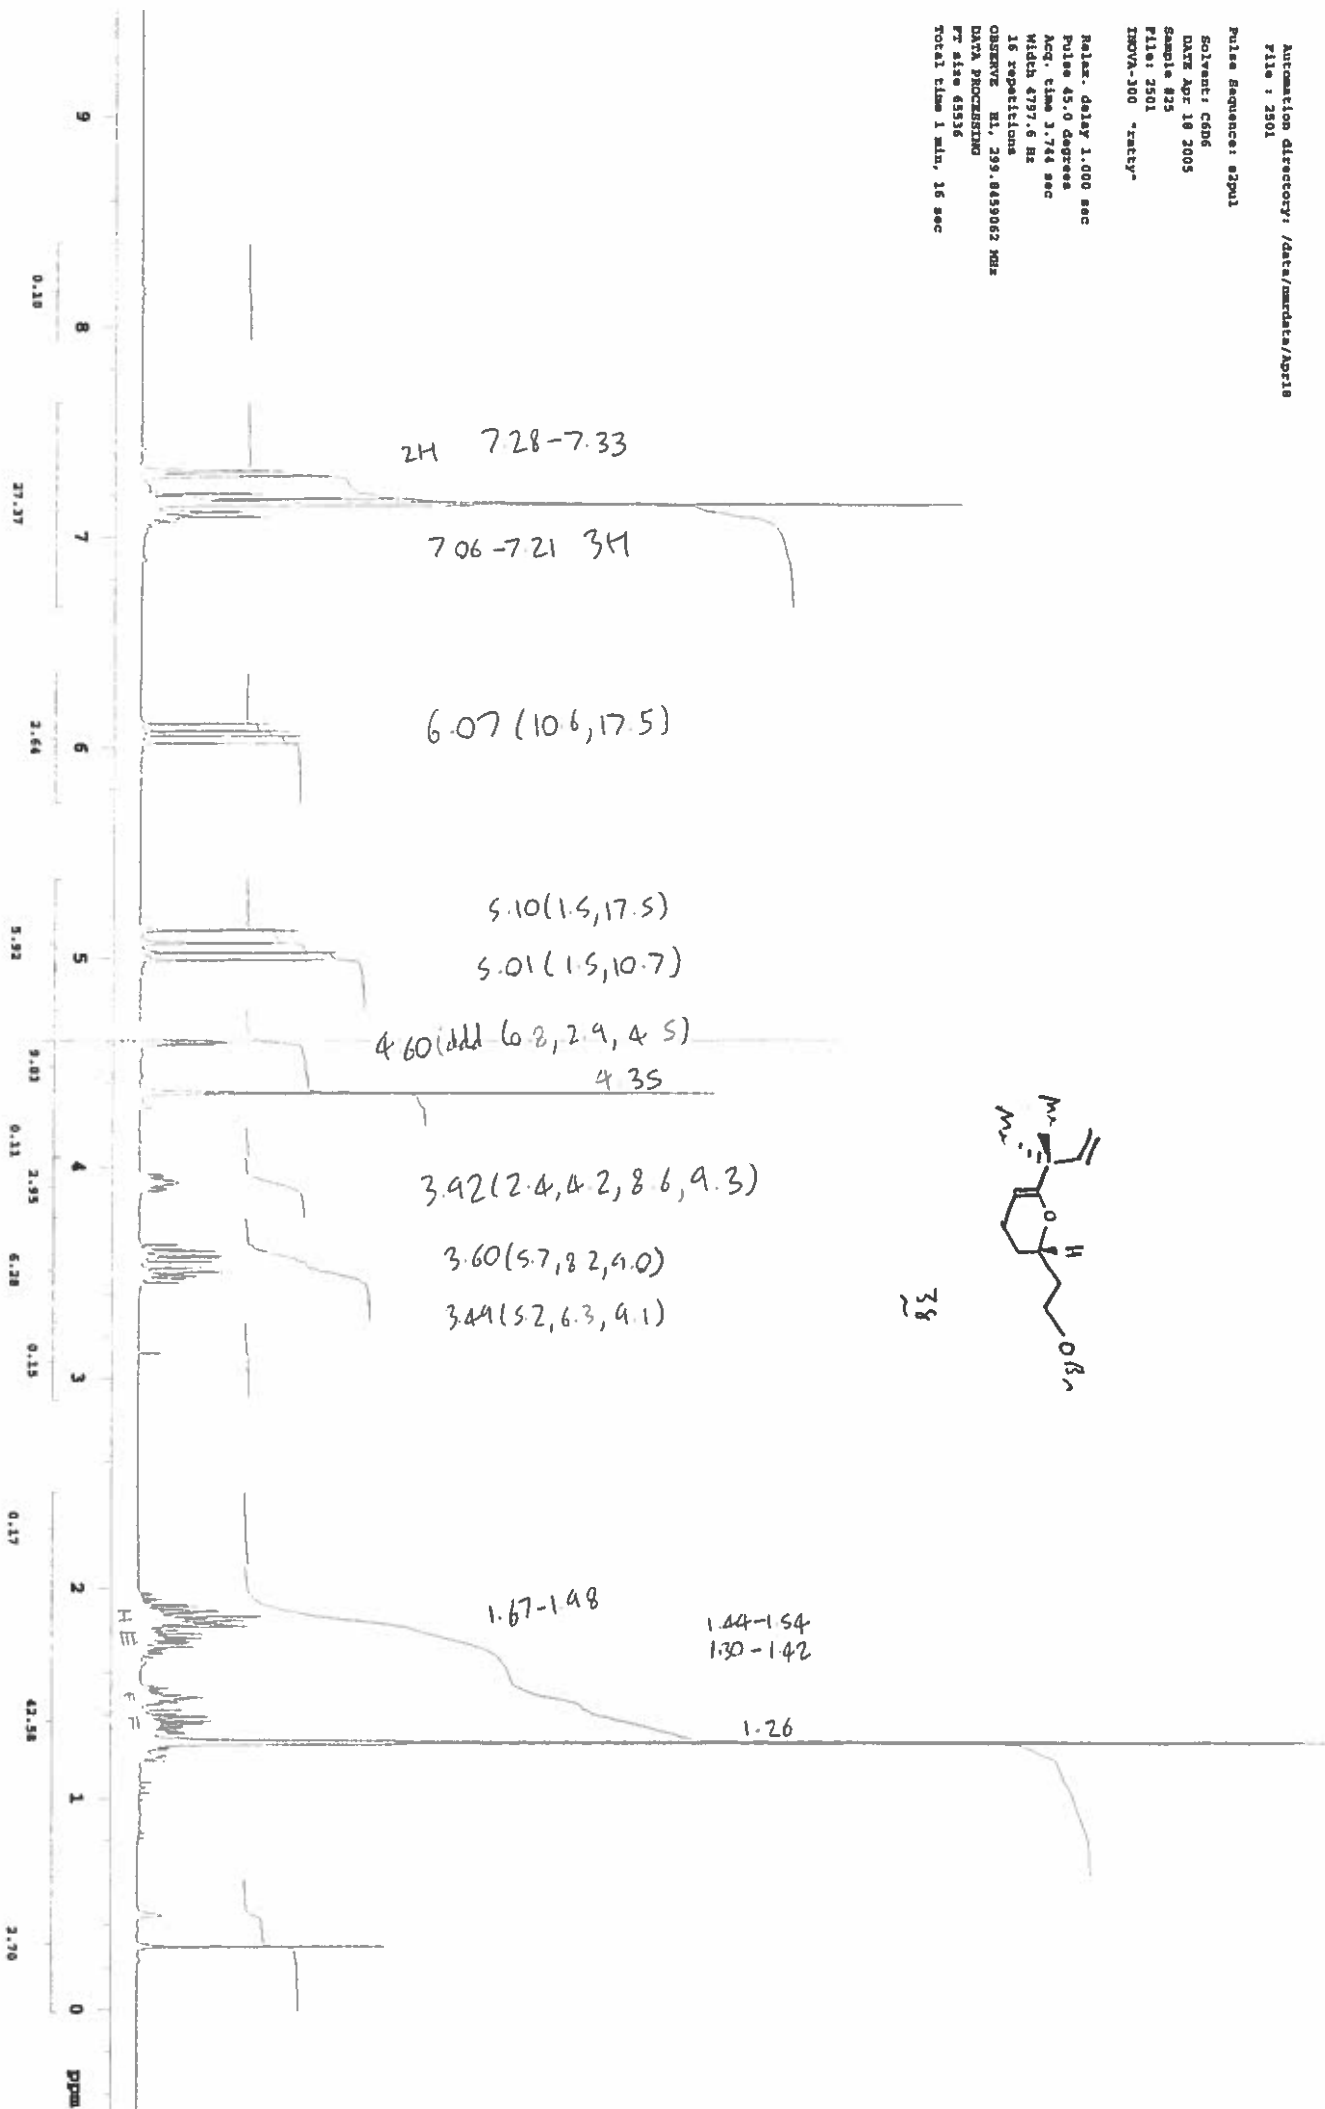

c:\g\_emo1  
STANDARD IN OBSERVE

Automation directory: /data/mrdata/jun01  
File: 3104

Pulse Sequence: zgpg

Solvent: C6D6

DATE Jun 2 2005

Sample 831

File: 3104

INSTR: 300 "zpg"

Pulse delay 1.000 sec

Pulse 45.0 degrees

Acq. time 1.815 sec

Width 18850.1 Hz

256 repetitions

OBSERVE C13, 75.3952951 MHz

DECOUPLE H1, 299.8474056 MHz

Power 37 dB

continuously on

WALTZ-16 modulated

DATA PROCESSING

Line broadening 1.0 Hz

FT size 131072

Total time 22 min, 2 sec

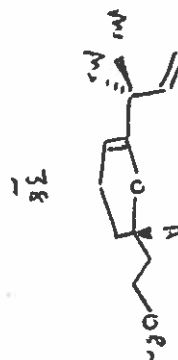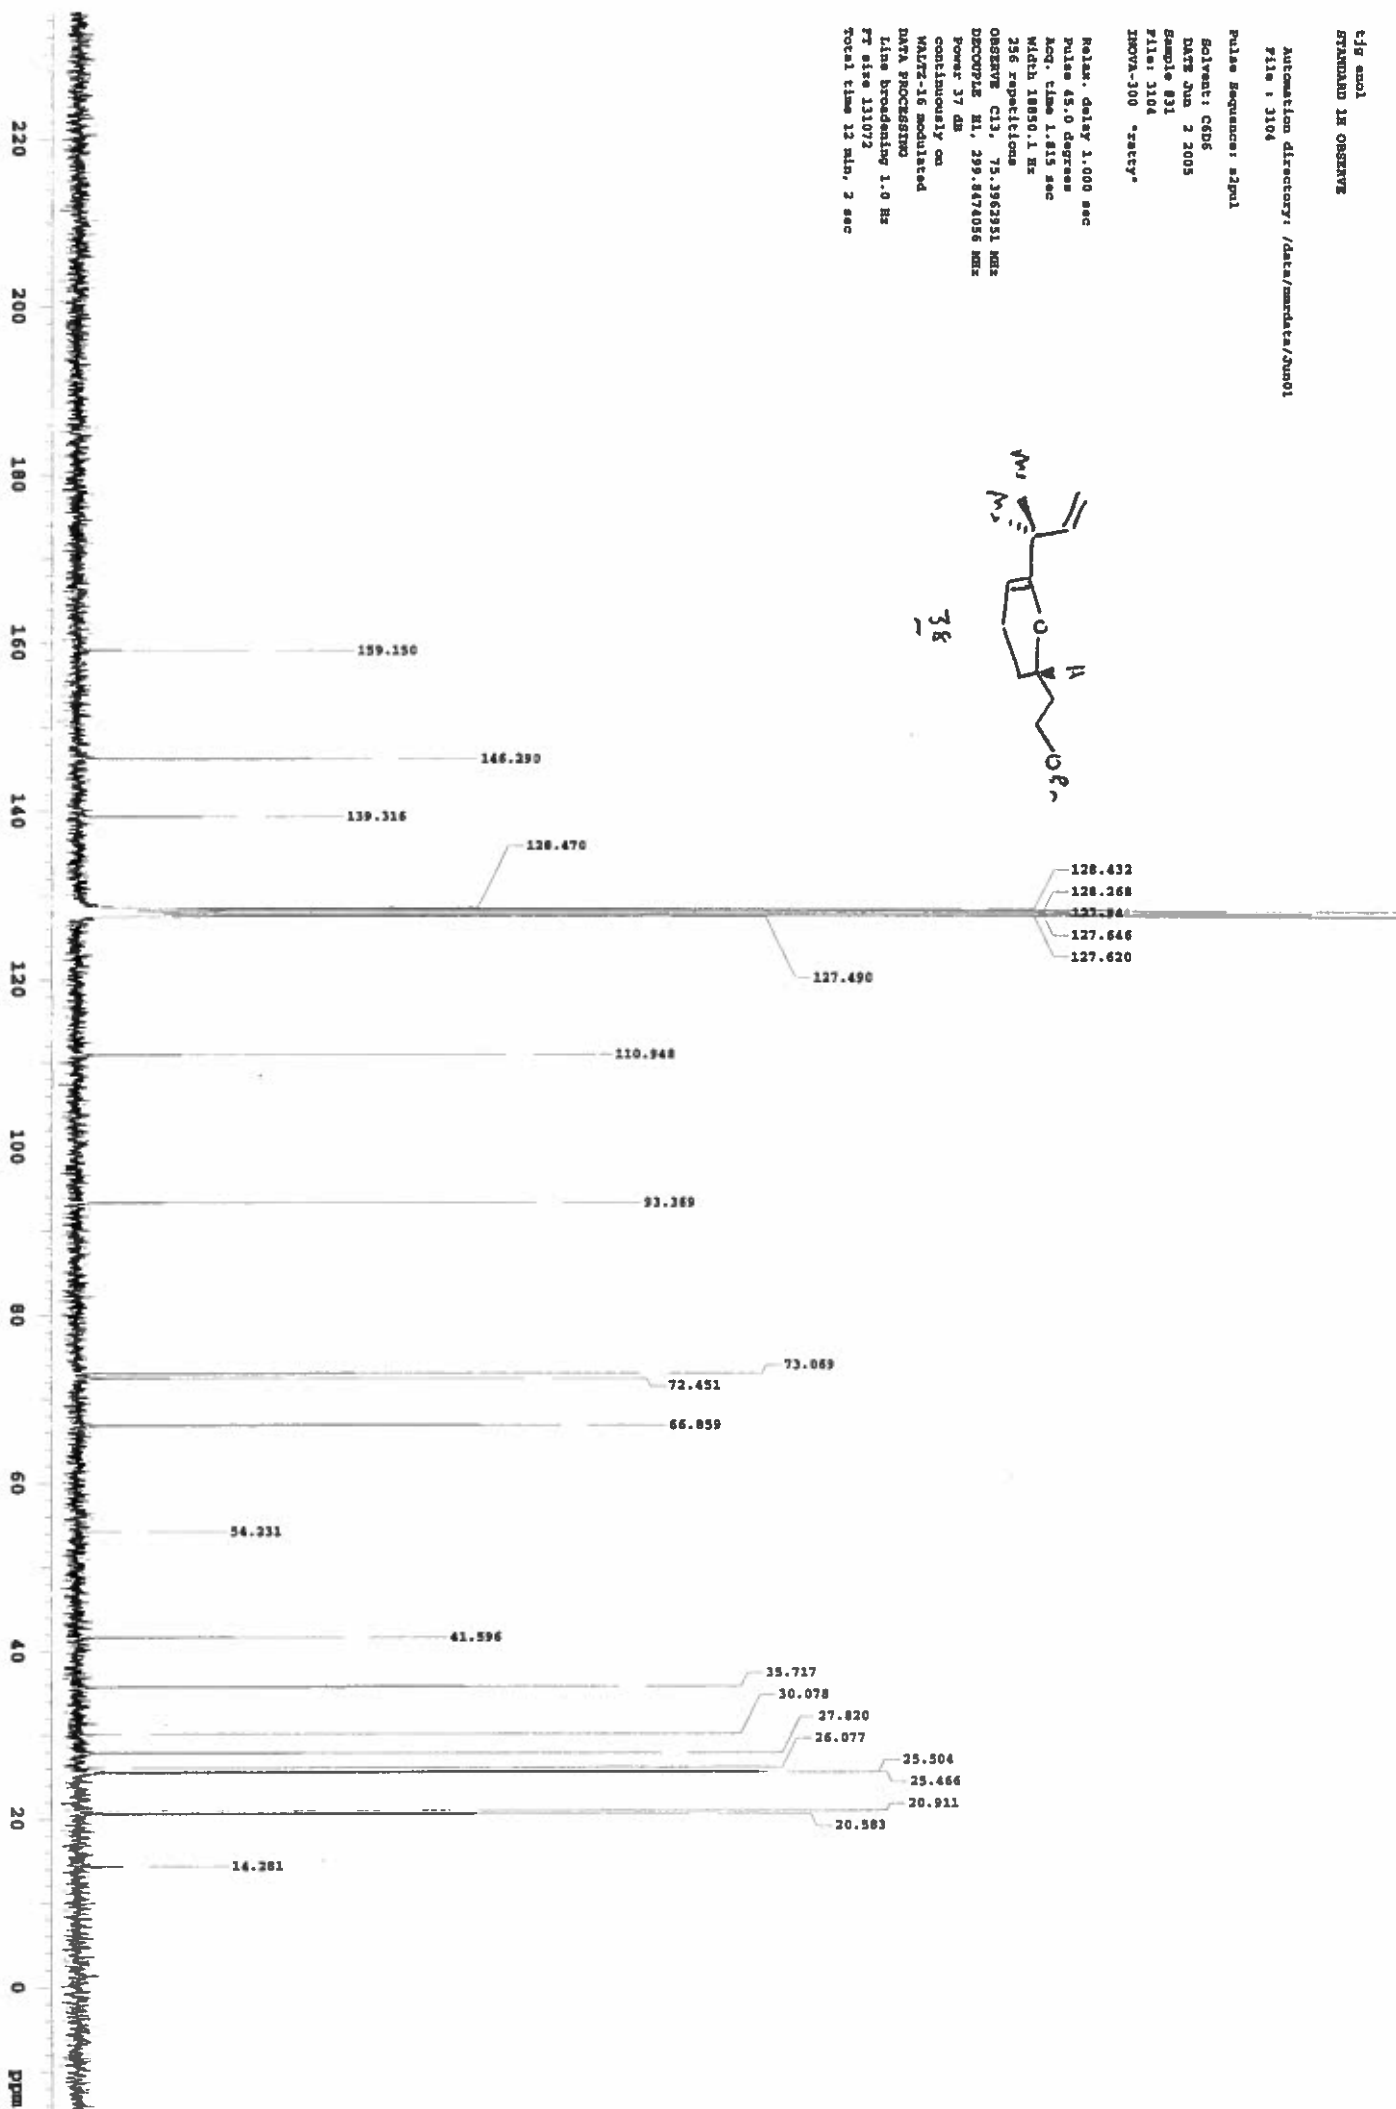

sup2  
STANDARD 1E OBSERVE

Automation directory: /data/nowdate/Jul09  
File: 0704

Pulse Sequence: zgpg1

Solvent: C6D6

DATE: Jun 10 2005

Sample: 87

File: 0704

NOVA-300 "naty"

Relax. delay 1.000 sec

Pulse 45.0 degree

Acq. time 3.764 sec

Width 4797.6 Hz

32 repetitions

OBSERVE: H1, 299.8459062 MHz

DATA PROCESSING

FF size 65536

Total time 2 min. 32 sec

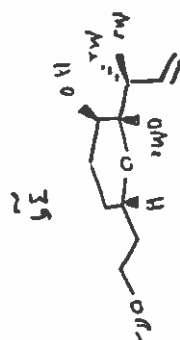

superhydrox II

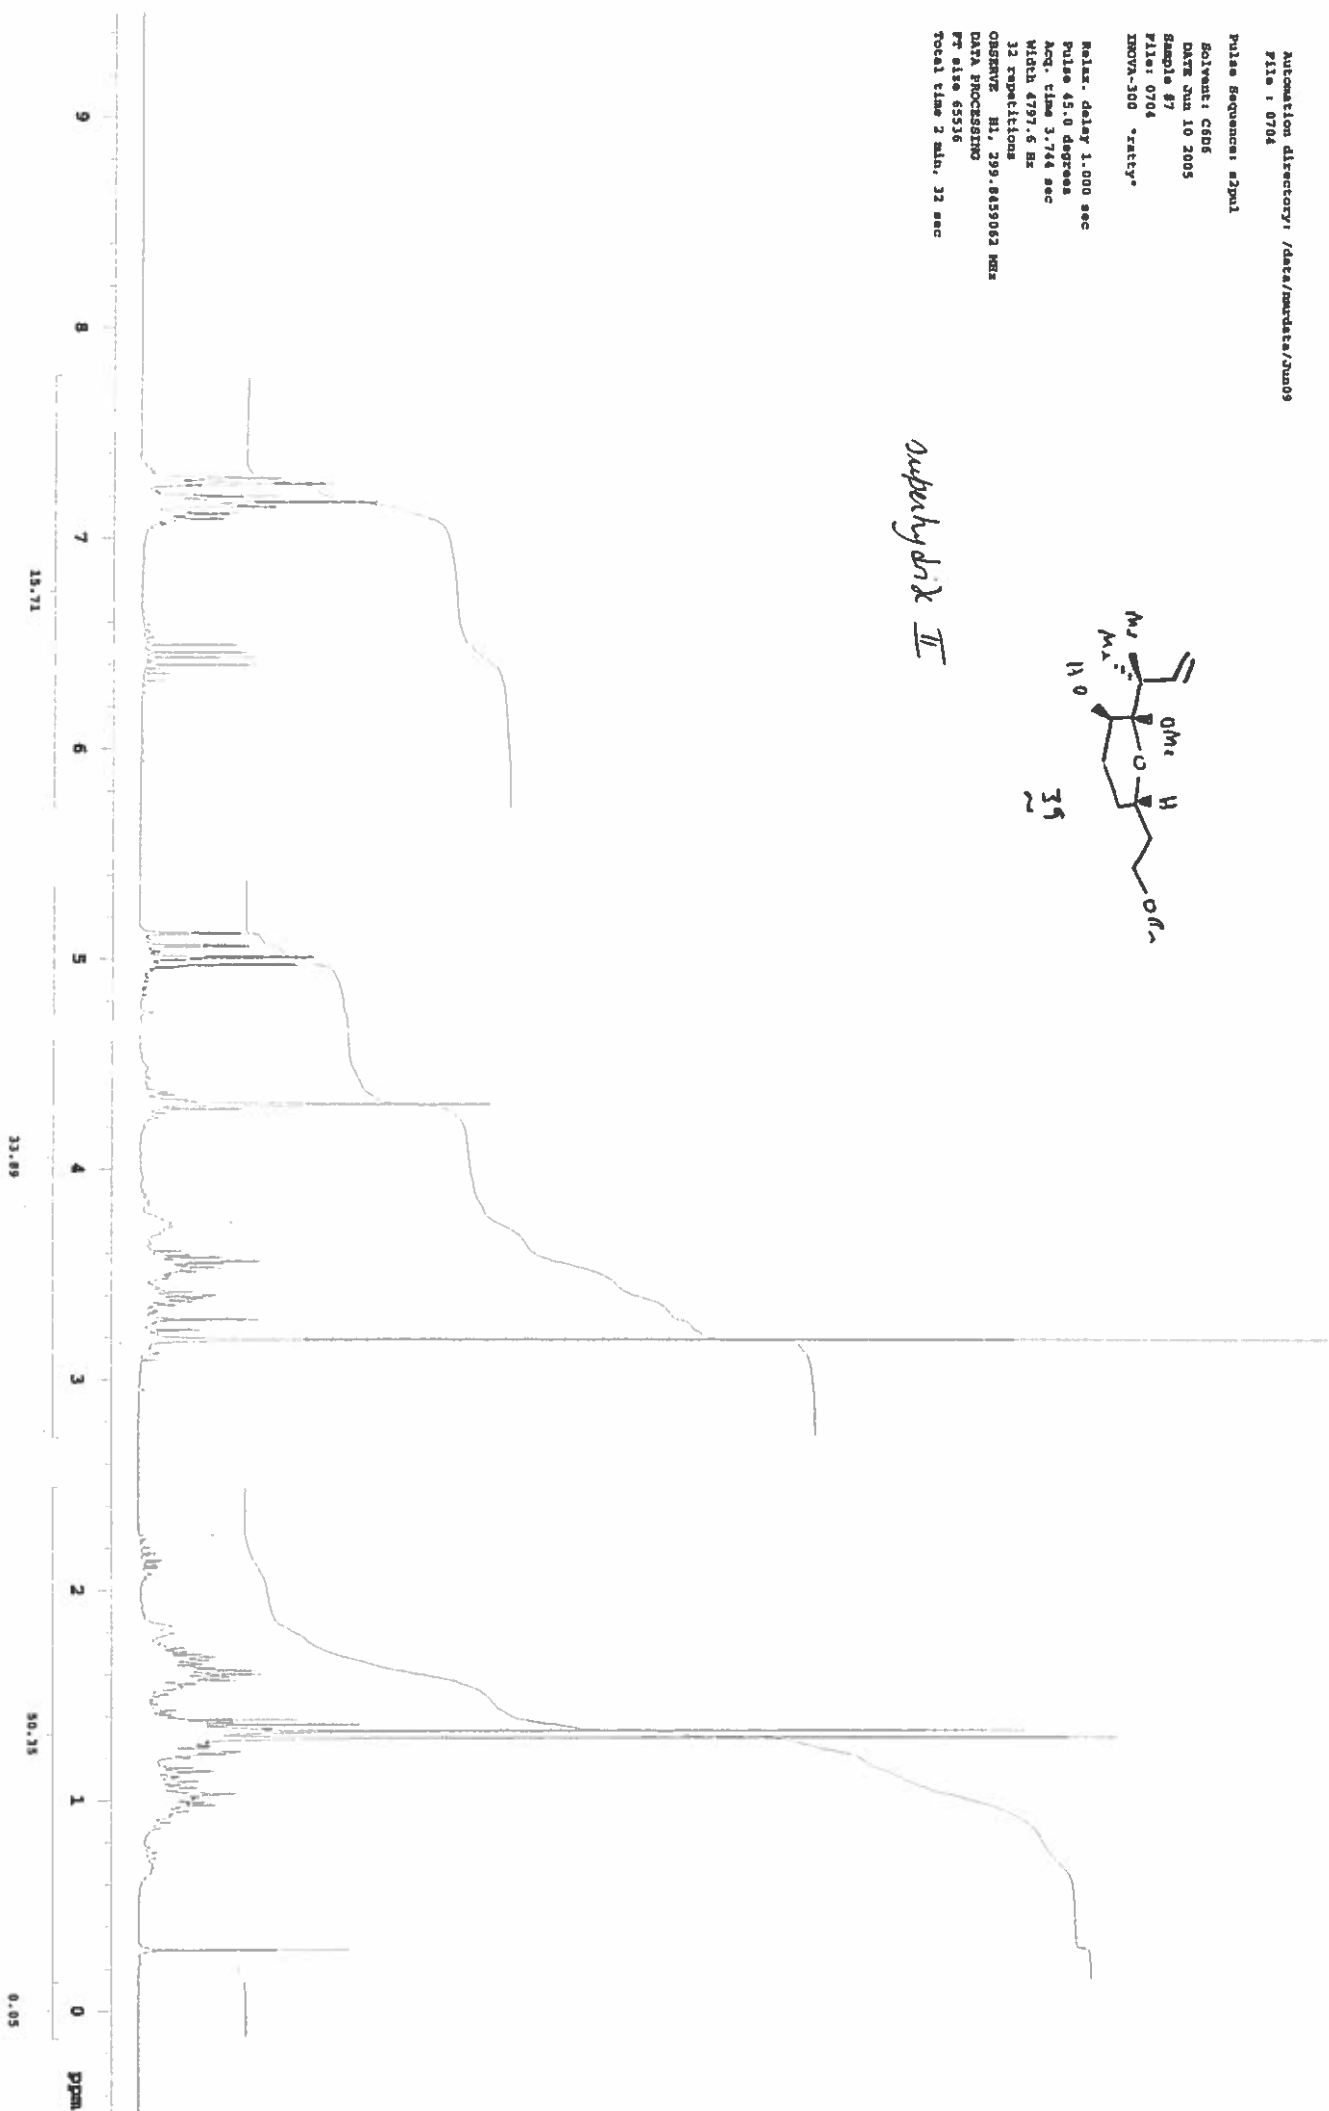

Automation directory: /data/nmrdata/may19  
File: 2103

Pulse sequence: zgpg1  
Solvent: CDCl<sub>3</sub>  
Date: May 20 2005  
Sample: 821  
File: 2103  
INSTR: 300 "patty"

Relax. delay 1.000 sec  
Pulse 45.0 degrees  
Acq. time 1.815 sec  
Width 18850.1 Hz  
2048 repetitions  
OBSERVE CH: 75.3063951 MHz  
DECOUPLE H1: 299.8474056 MHz  
Power 37 dB  
continuously on  
WALTZ-16 modulated  
DATA PROCESSING  
Line broadening 1.0 Hz  
F2 size 131072  
Total time 1 hr, 36 min, 23 sec

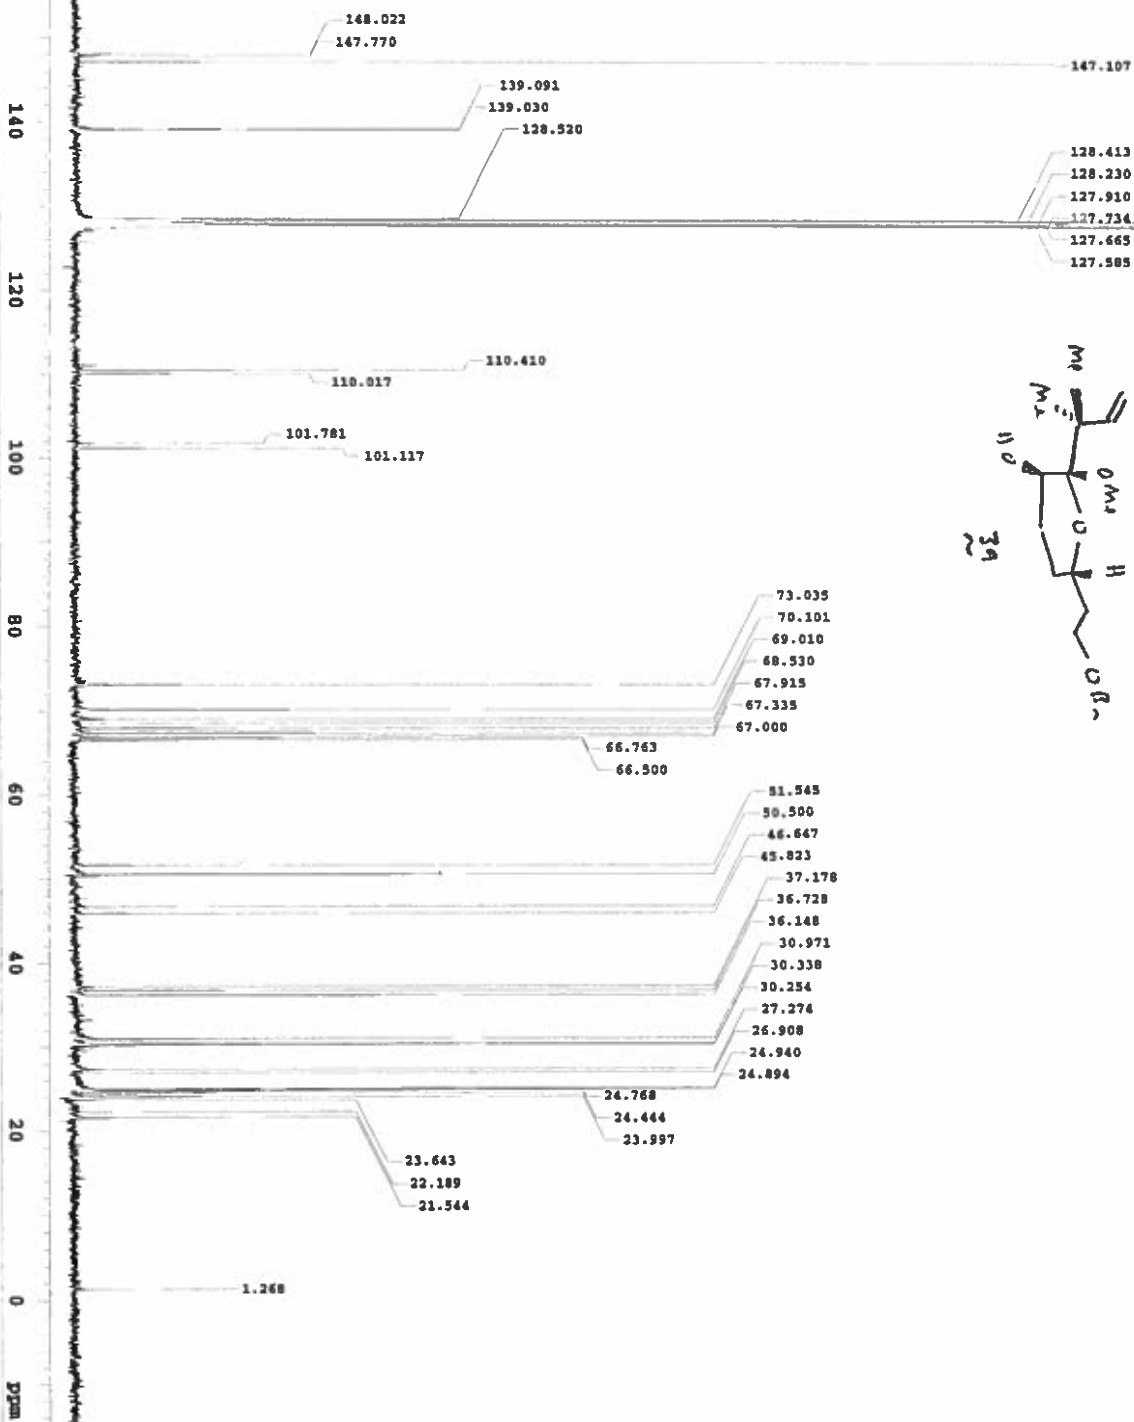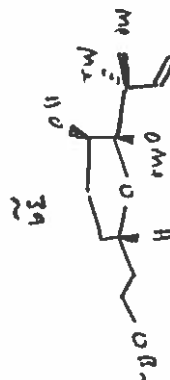



F ket  
STANDARD IR OBSERVE

Automation directory: /data/nmrdata/May17  
File: 1602

Pulse Sequence: zgpg30

Solvent: CDCl<sub>3</sub>

DATE May 18 2005

Sample #16

File: 1602

INSTRUMENT: spect

Pulse delay 1.000 sec

Pulse 45.0 degrees

Acq. time 3.744 sec

Width 4797.6 Hz

16 repetitions

OBSERVE NL 299.8459062 MHz

DATA PROCESSING

FT size 65536

Total time 1 min, 16 sec

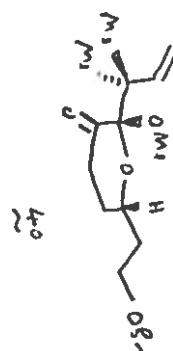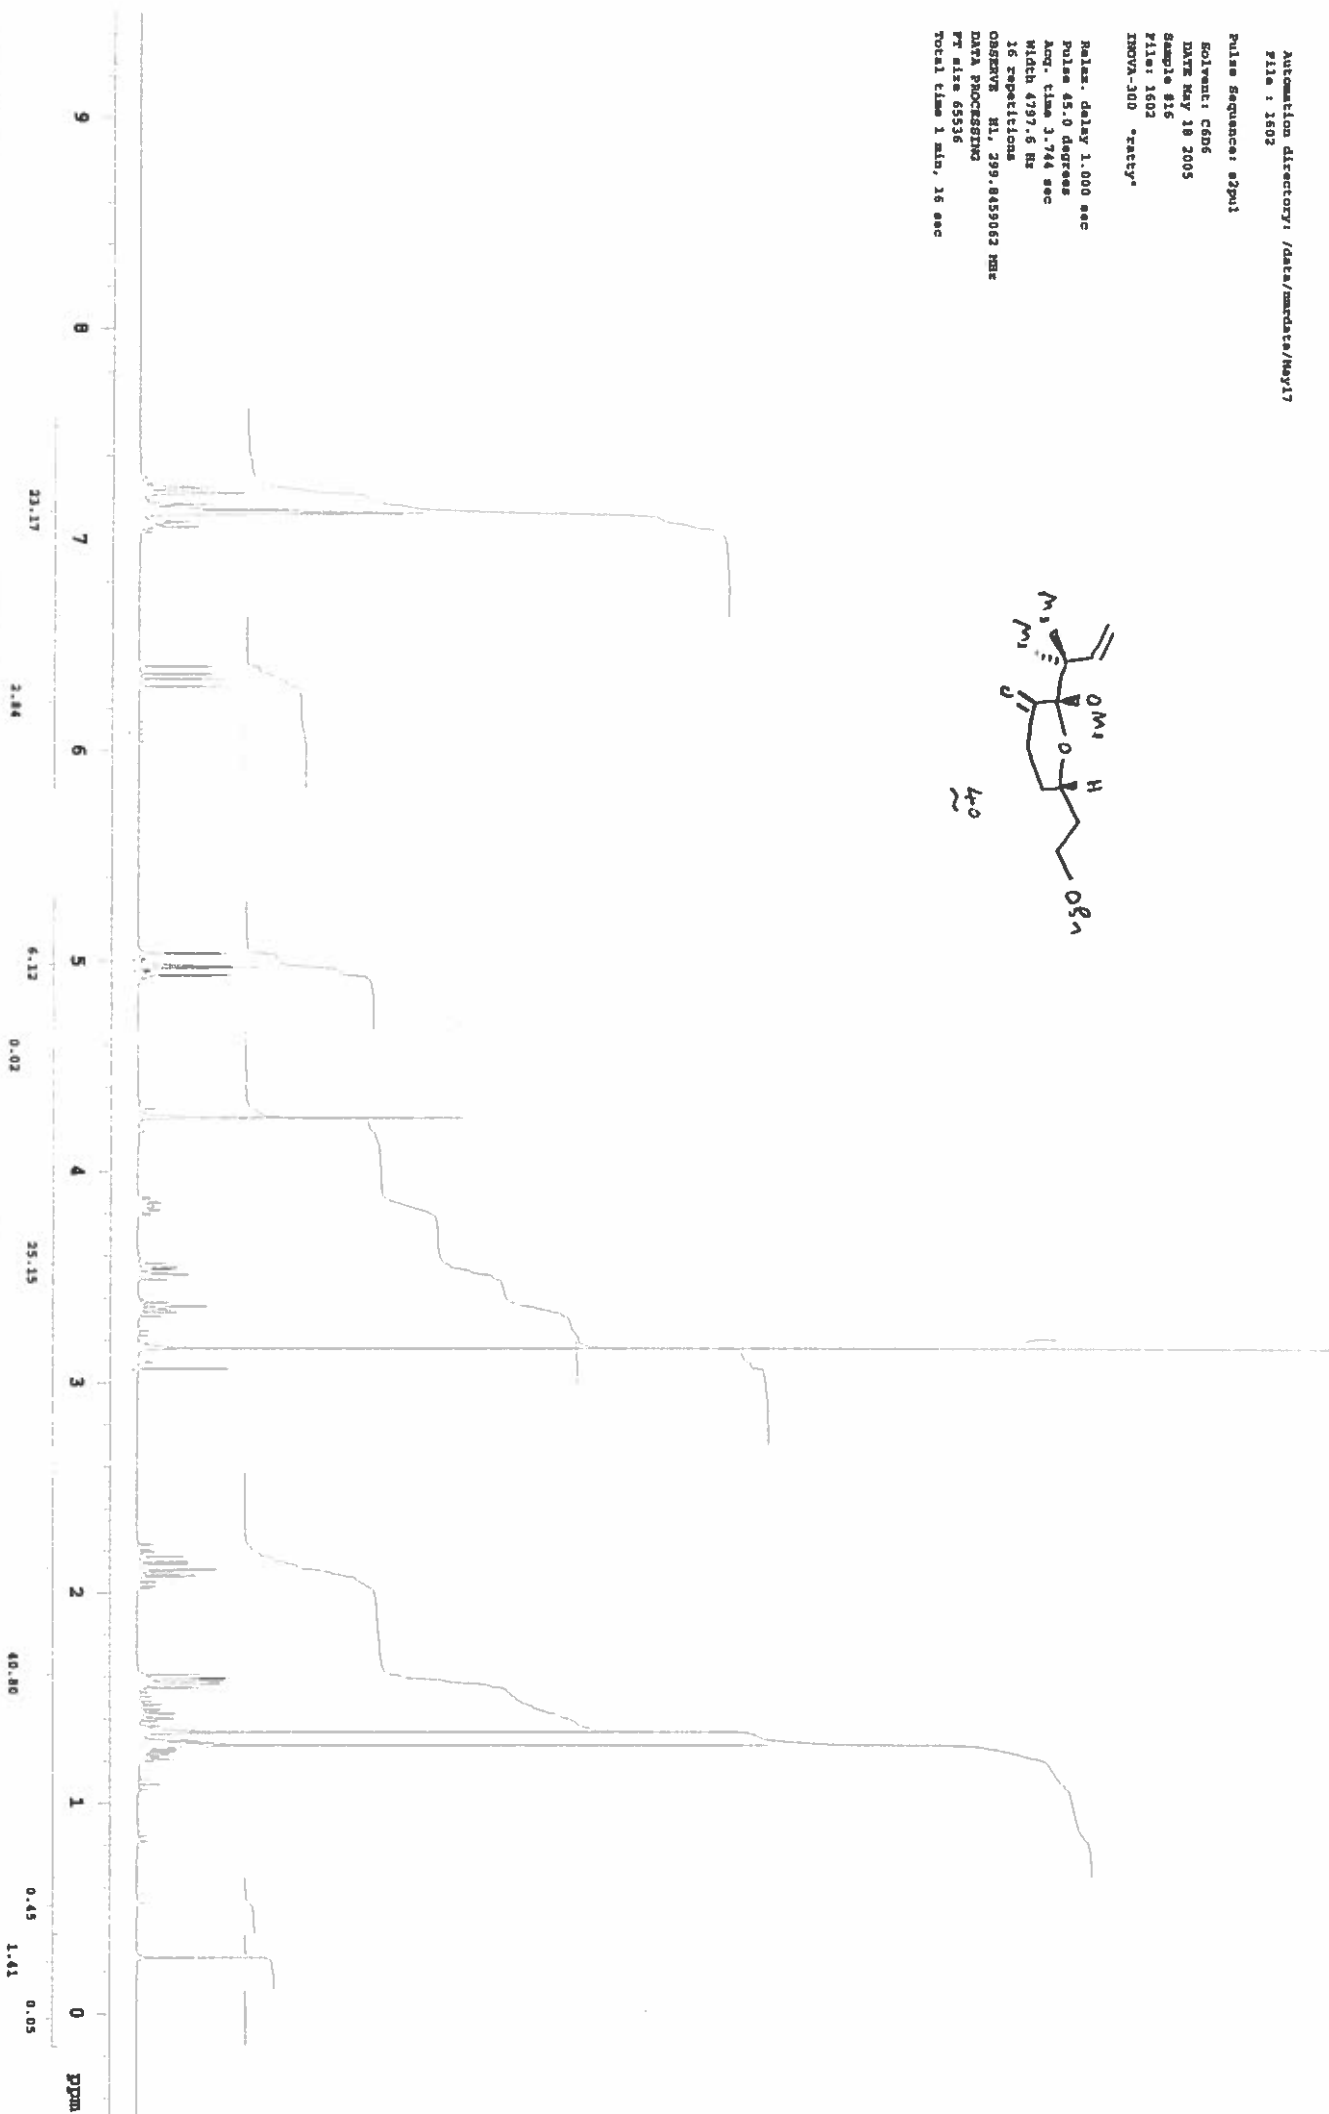

r ket  
STANDARD IN OBSERVE

Automation directory: /data/murdata/May17  
File: 1603

Pulse Sequence: zgpg30  
Solvent: CDCl3  
Date: May 18 2005  
Sample #: 16  
File: 1603  
INOVA-300 "ratty"

Relax. delay 1.000 sec  
Pulse 45.0 degrees  
Acq. time 1.815 sec  
Width 18850.1 Hz  
256 repetitions  
OBSERVE CH1, 75.3962951 MHz  
DECOUPLE H1, 299.8474056 MHz  
Power 37 dB  
continuously on  
WALTZ-16 modulated  
DATA PROCESSING  
Line broadening 1.0 Hz  
FT size 111072  
Total time 12 min, 2 sec

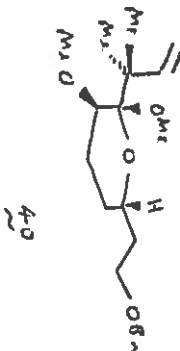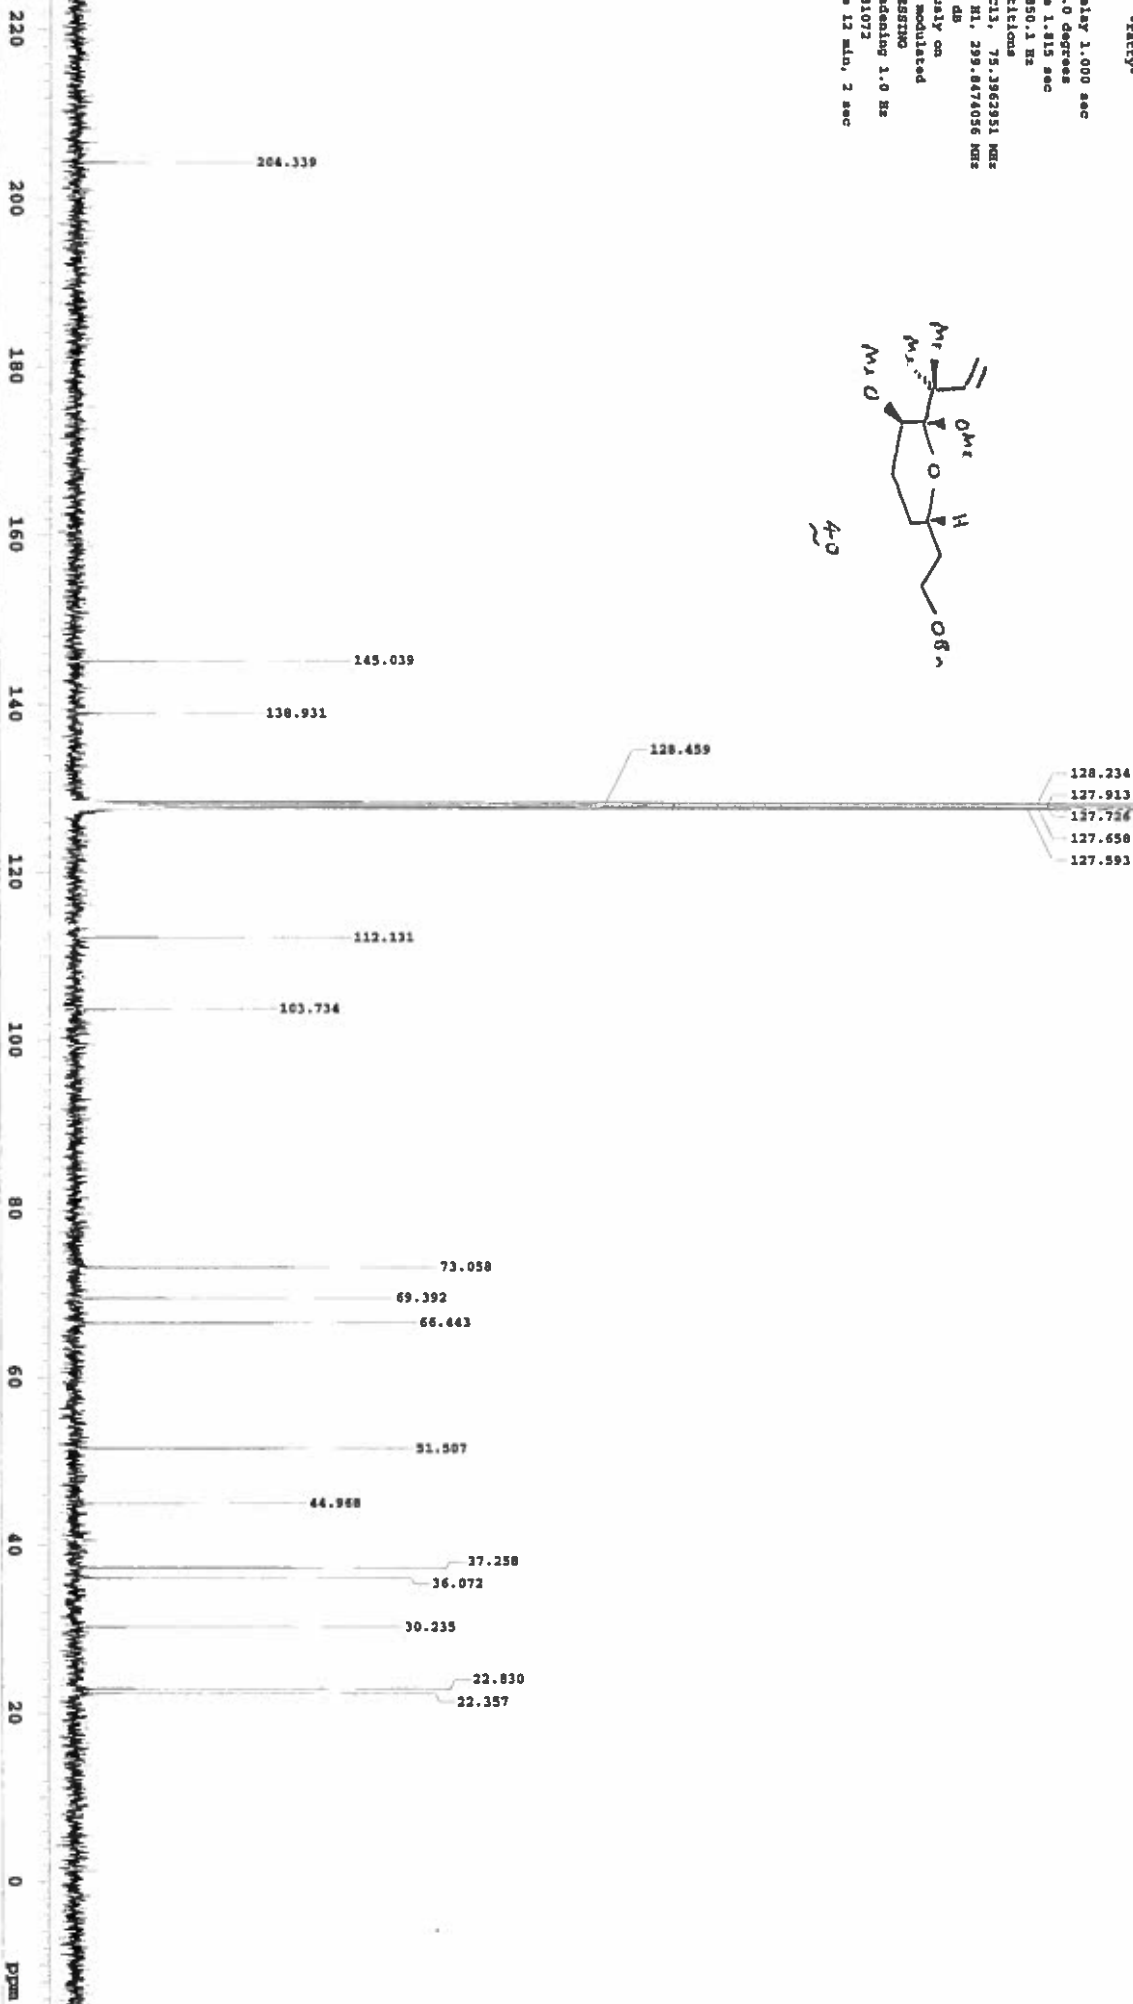

methlb  
STANDARD 1H OBSERVE

Automation directory: /data/mwdata/June4  
File: 2102

Pulse sequence: zgpg30

Solvent: CDCl<sub>3</sub>

DATE: Jun 15 2005

Sample #21

File: 2102

INNOVA-300 "Fracty"

Relax. delay 1.000 sec

Pulse 45.0 degrees

Acq. time 3.764 sec

Width 4797.6 Hz

16 repetitions

OBSERVE: H1, 299.8459062 MHz

DATA PROCESSING

PT size 65536

Total time 1 min, 16 sec

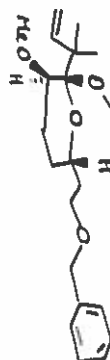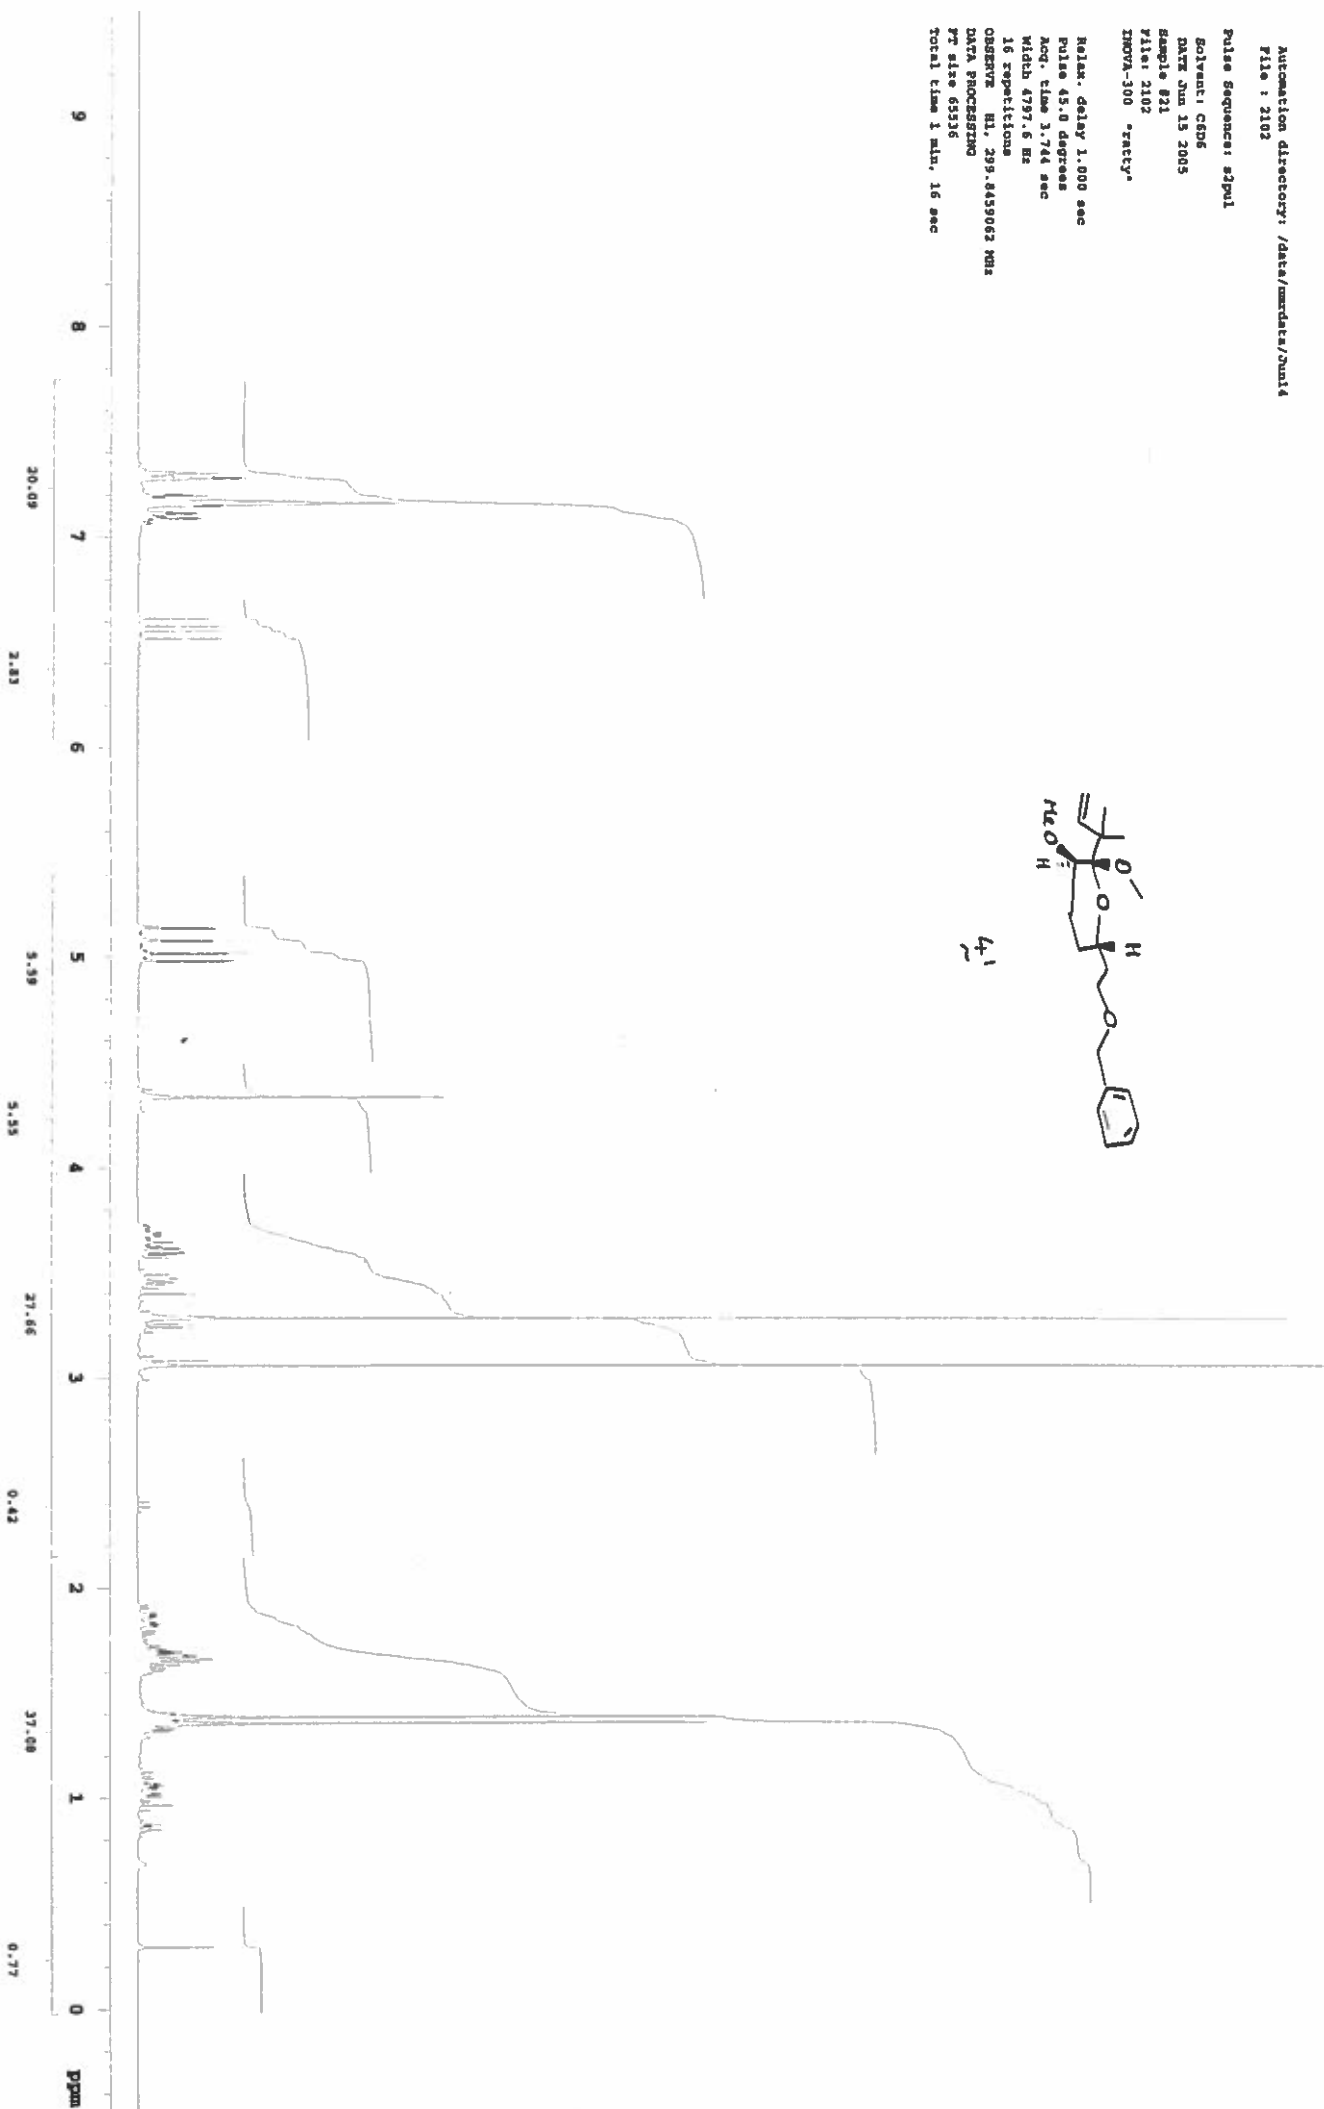

Automation directory: /data/nmrdata/0un15  
File: 2703

Pulse Sequence: zgpg1

Solvent: CDCl<sub>3</sub>

DATE: Jun 16 2005

Sample #27

File: 2703

INOVA-300 "Fatty"

Relax. delay 1.000 sec

Pulse 45.0 degrees

Acq. time 3.744 sec

Width 2763.1 Hz

16 repetitions

OBSERVE M1, 299.8659062 MHz

DATA PROCESSING

FT size 32768

Total time 1 min, 16 sec

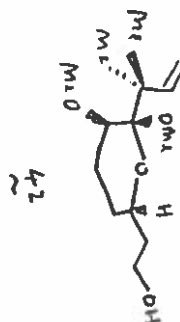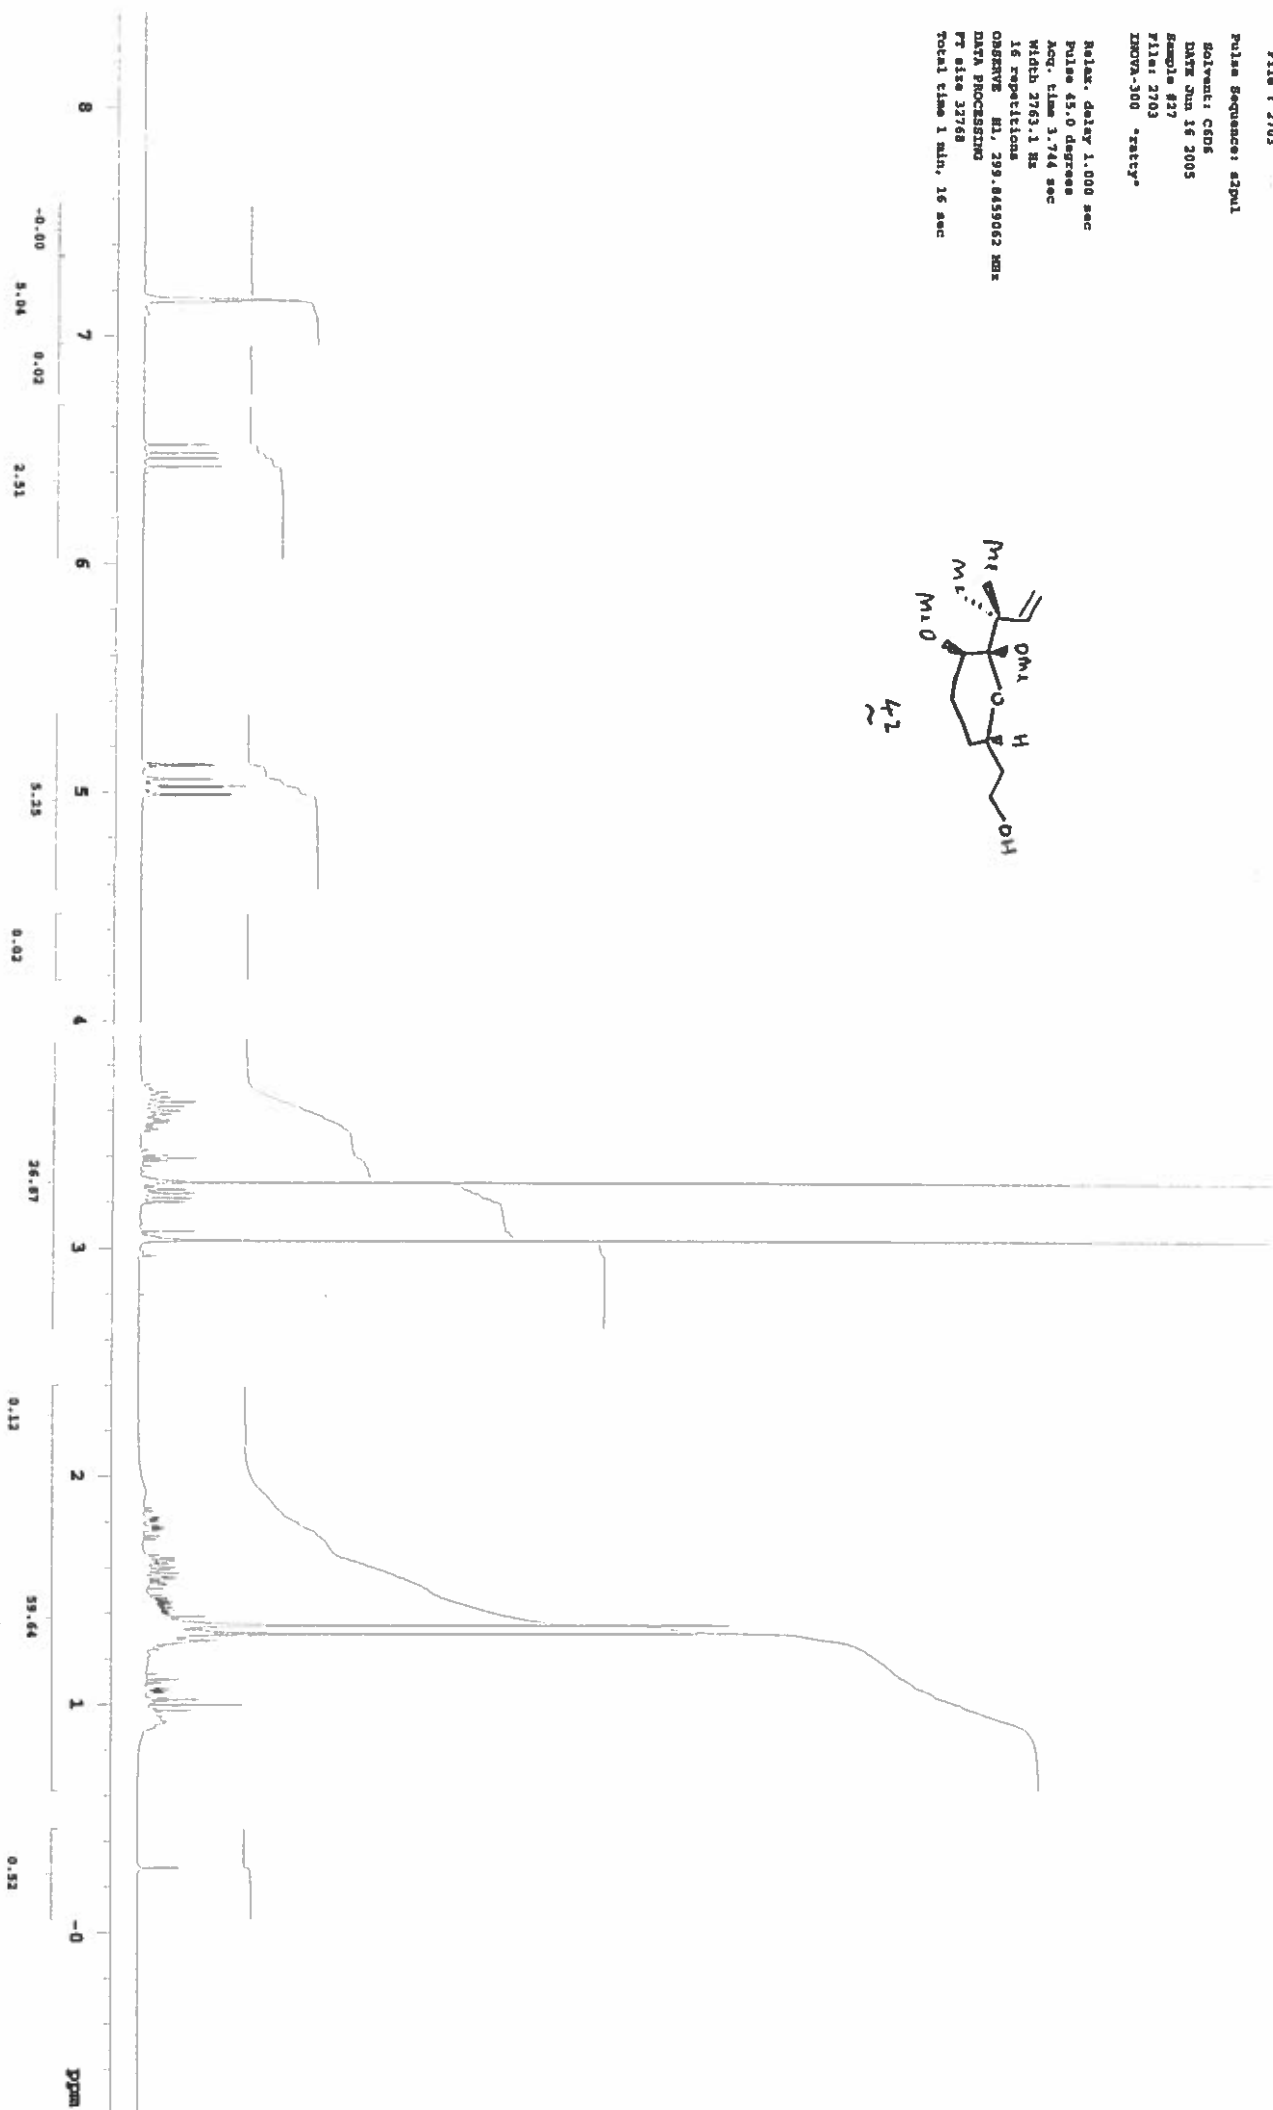

mod  
STANDARD 1H OBSERVE

Automation directory: /data/rmrdata/jun16  
File: 2704

Pulse sequence: zgpg30

Solvent: CDCl3  
Date: Jun 16 2005  
Sample: 827  
File: 2704  
INSTR: 300 "nucly"

Relax. delay: 1.000 sec  
Pulse: 45.0 degrees  
Acq. time: 1.815 sec  
Width: 18850.1 Hz  
356 repetitions  
OBSERVE: c13, 75.362931 MHz  
DECOUPLE: h1, 299.8474056 MHz  
Power: 37 dB  
Conditionally on  
MAGT-16 modulated  
DATA PROCESSING  
Line broadening: 1.0 Hz  
FT size: 131072  
Total time: 12 min, 2 sec

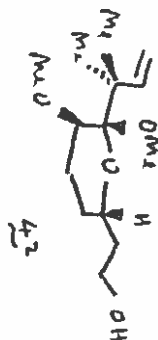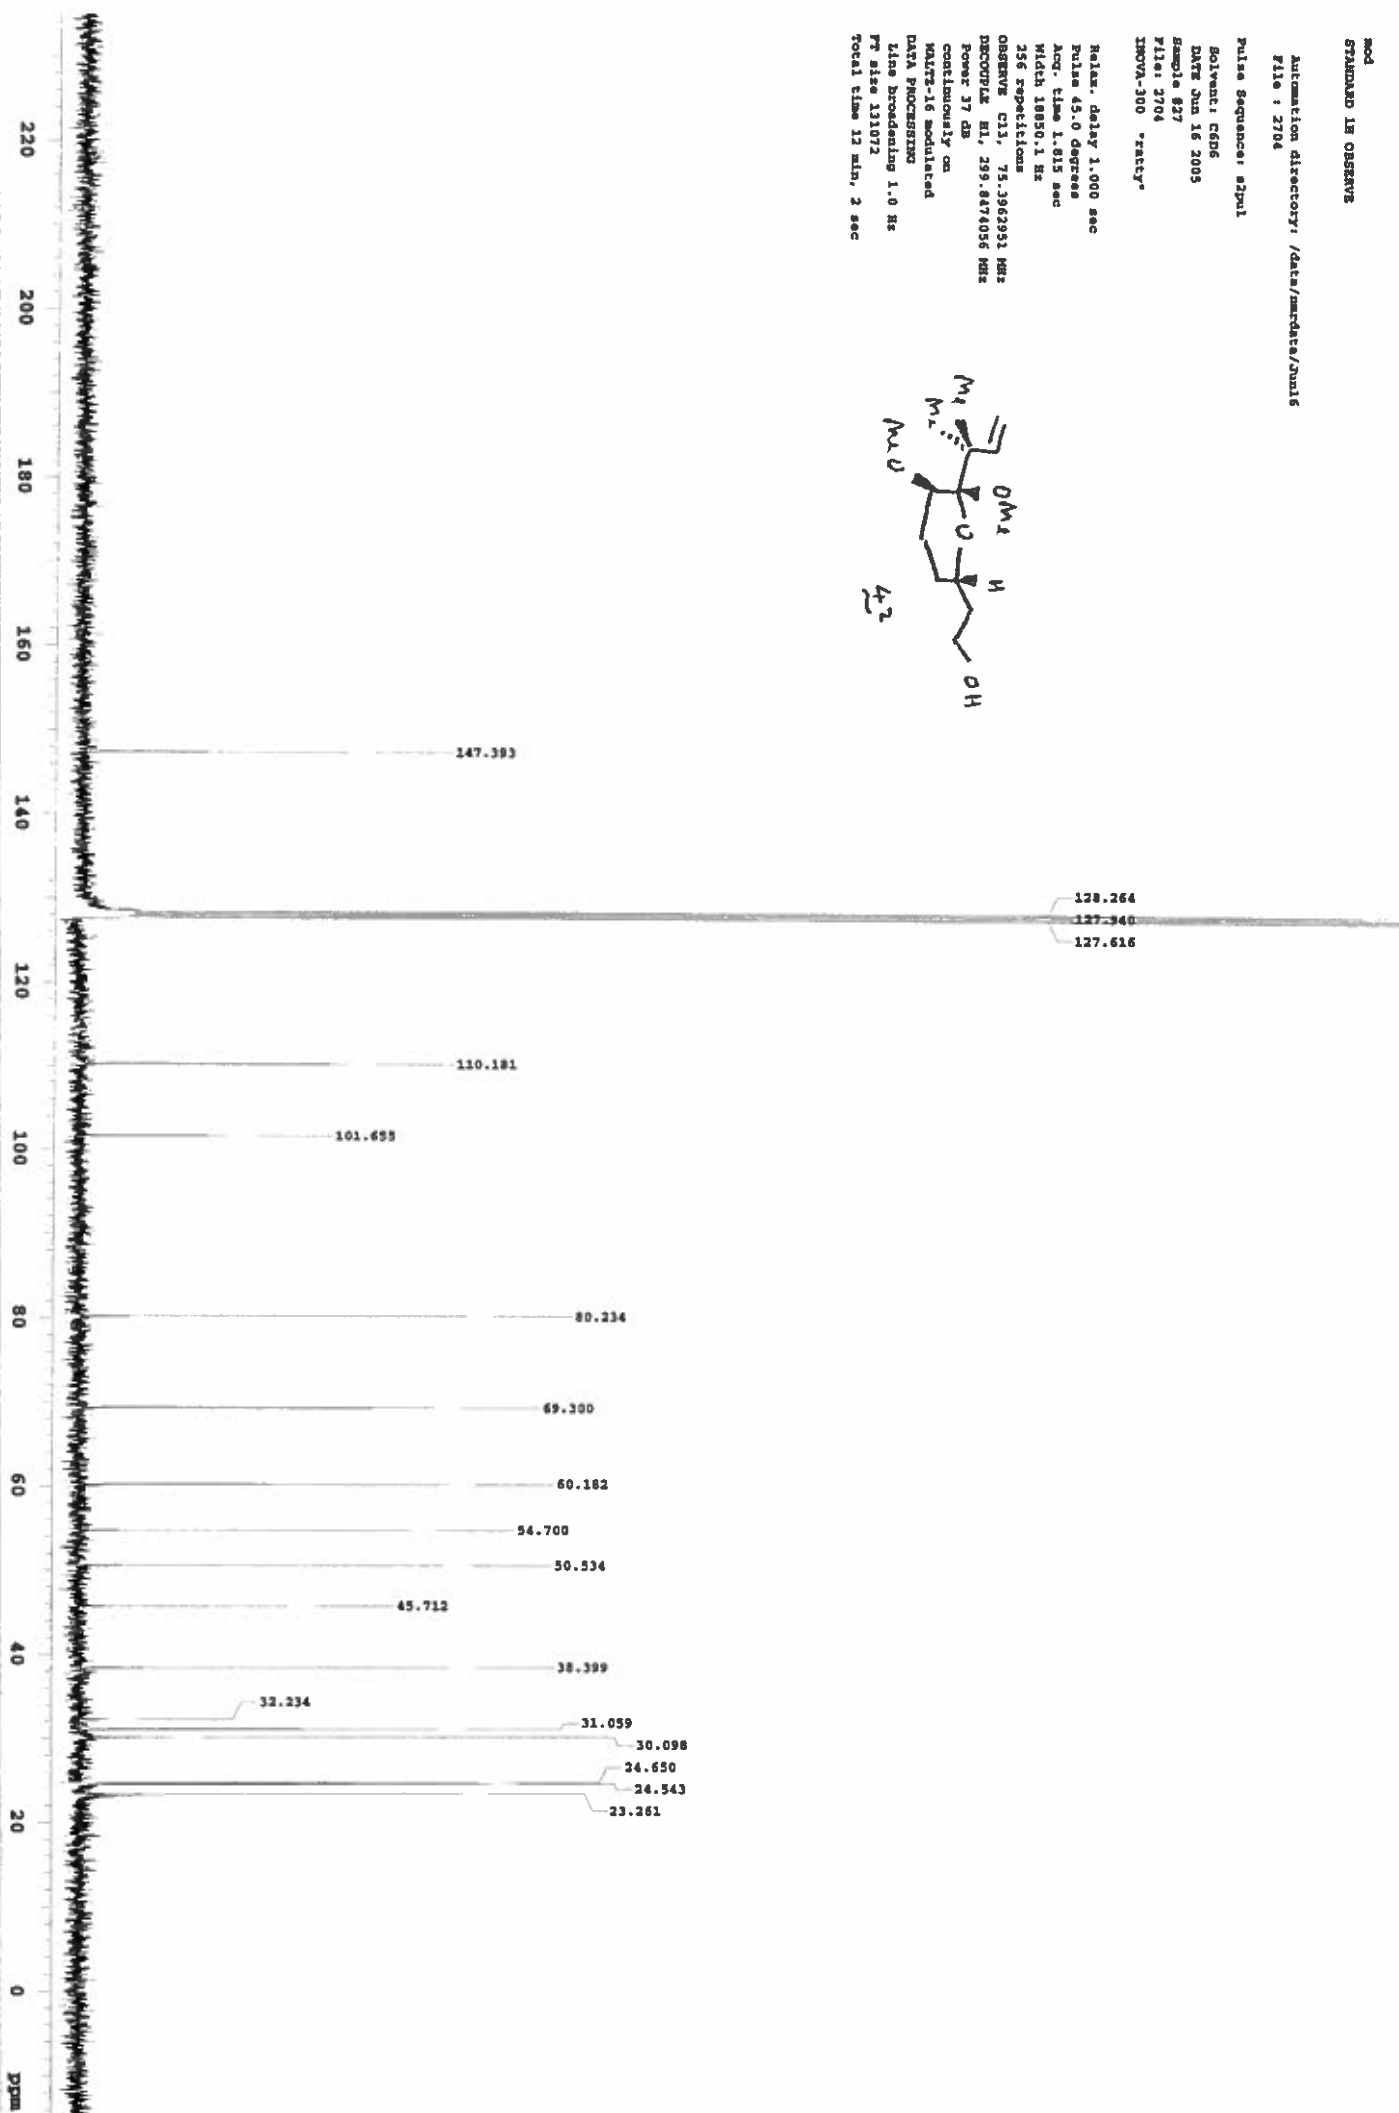

msmc-05-91  
STANDARD IR OBSERVE

Automation directory: /data/msdata/Ms18  
File: 1801

Pulse Sequence: sfpul  
Solvent: cdcl3  
Date Mar 18 2003  
Sample 818  
File: 1801  
INOVA-300 "ethos"

Pulse: delay 1.000 sec  
Pulse 45.0 degrees  
Acq. time 3.744 sec  
Width 4797.6 Hz  
16 repetitions  
OBSERVE M1, 289.8458793 MHz  
DATA PROCESSING  
FT size 65336  
Total time 1 min, 16 sec

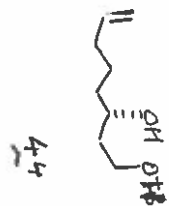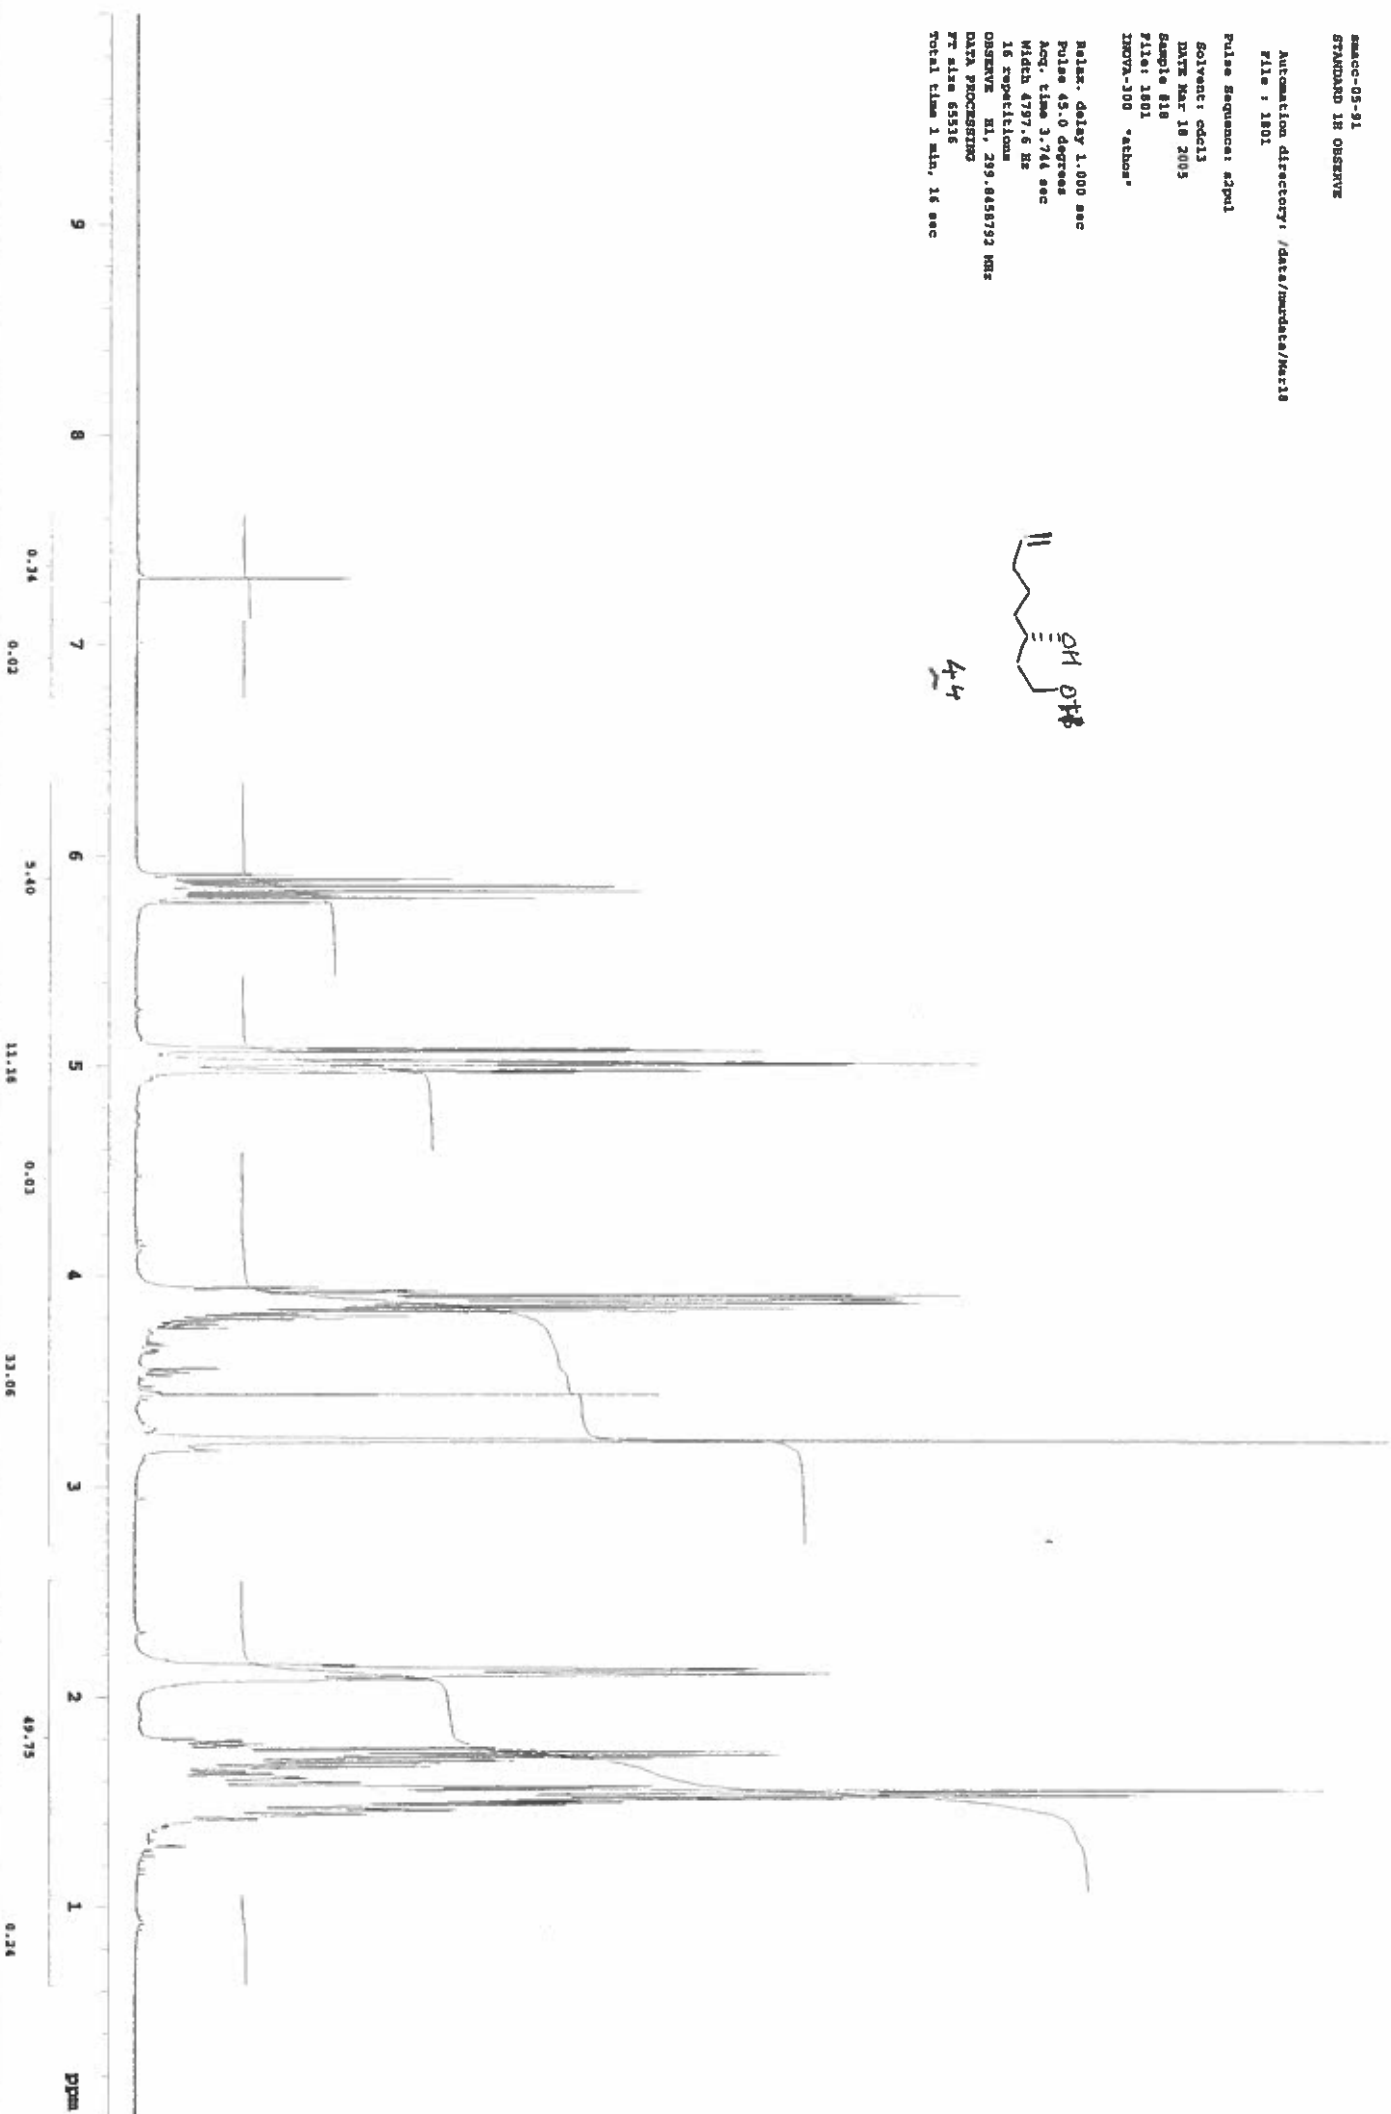

Automation directory: /data/mwdata/Mar18  
File: 1802

Pulse sequence: zgpg1

Solvent: cdcl3

Date Mar 18 2005

Sample #18

File: 1802

INOVA-300 "aloha"

Relax. delay 1.000 sec

Pulse 45.0 degrees

Acq. time 1.815 sec

Width 18850.1 Hz

256 repetitions

OBSERVE c13, 75.362863 MHz

DECUPLE H1, 299.8473786 MHz

Power 37 dB

continuously on

WALTZ-16 modulated

DATA PROCESSING

Line broadening 1.0 Hz

FT size 131072

Total time 12 min, 2 sec

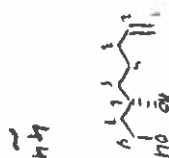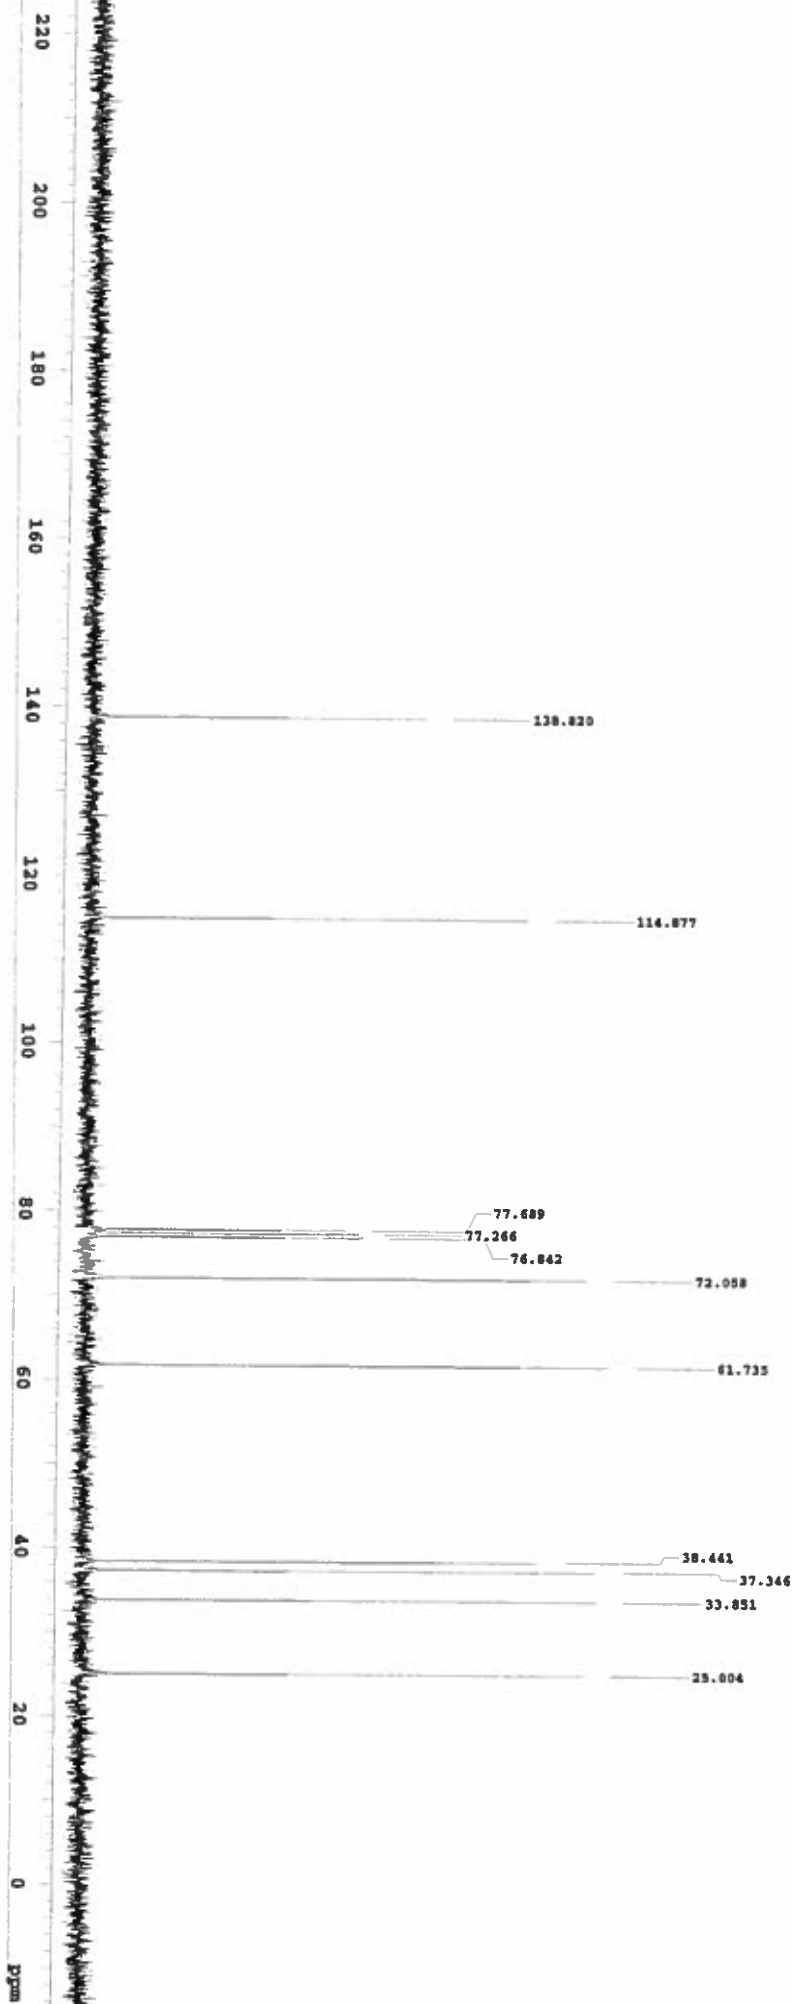

Automation directory: /data/nydata/Mar11  
Y110 : 2001

Pulse Sequence: s2pul

Solvent:  $\text{cdcl}_3$ 

**Sample #20**

**ИДЖА-300 "Fatty"**

Polar. delay 1.000 sec  
 Pulse 45.0 degrees  
 Acq. time 3.764 sec  
 Width 4797.6 Hz  
 16 repetitions  
 OBSERVE H1. 299.8458792 MHz  
 DATA PROCESSING  
 Pt size 65536  
 Total time 1 min, 16 sec

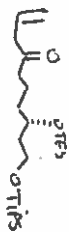

48

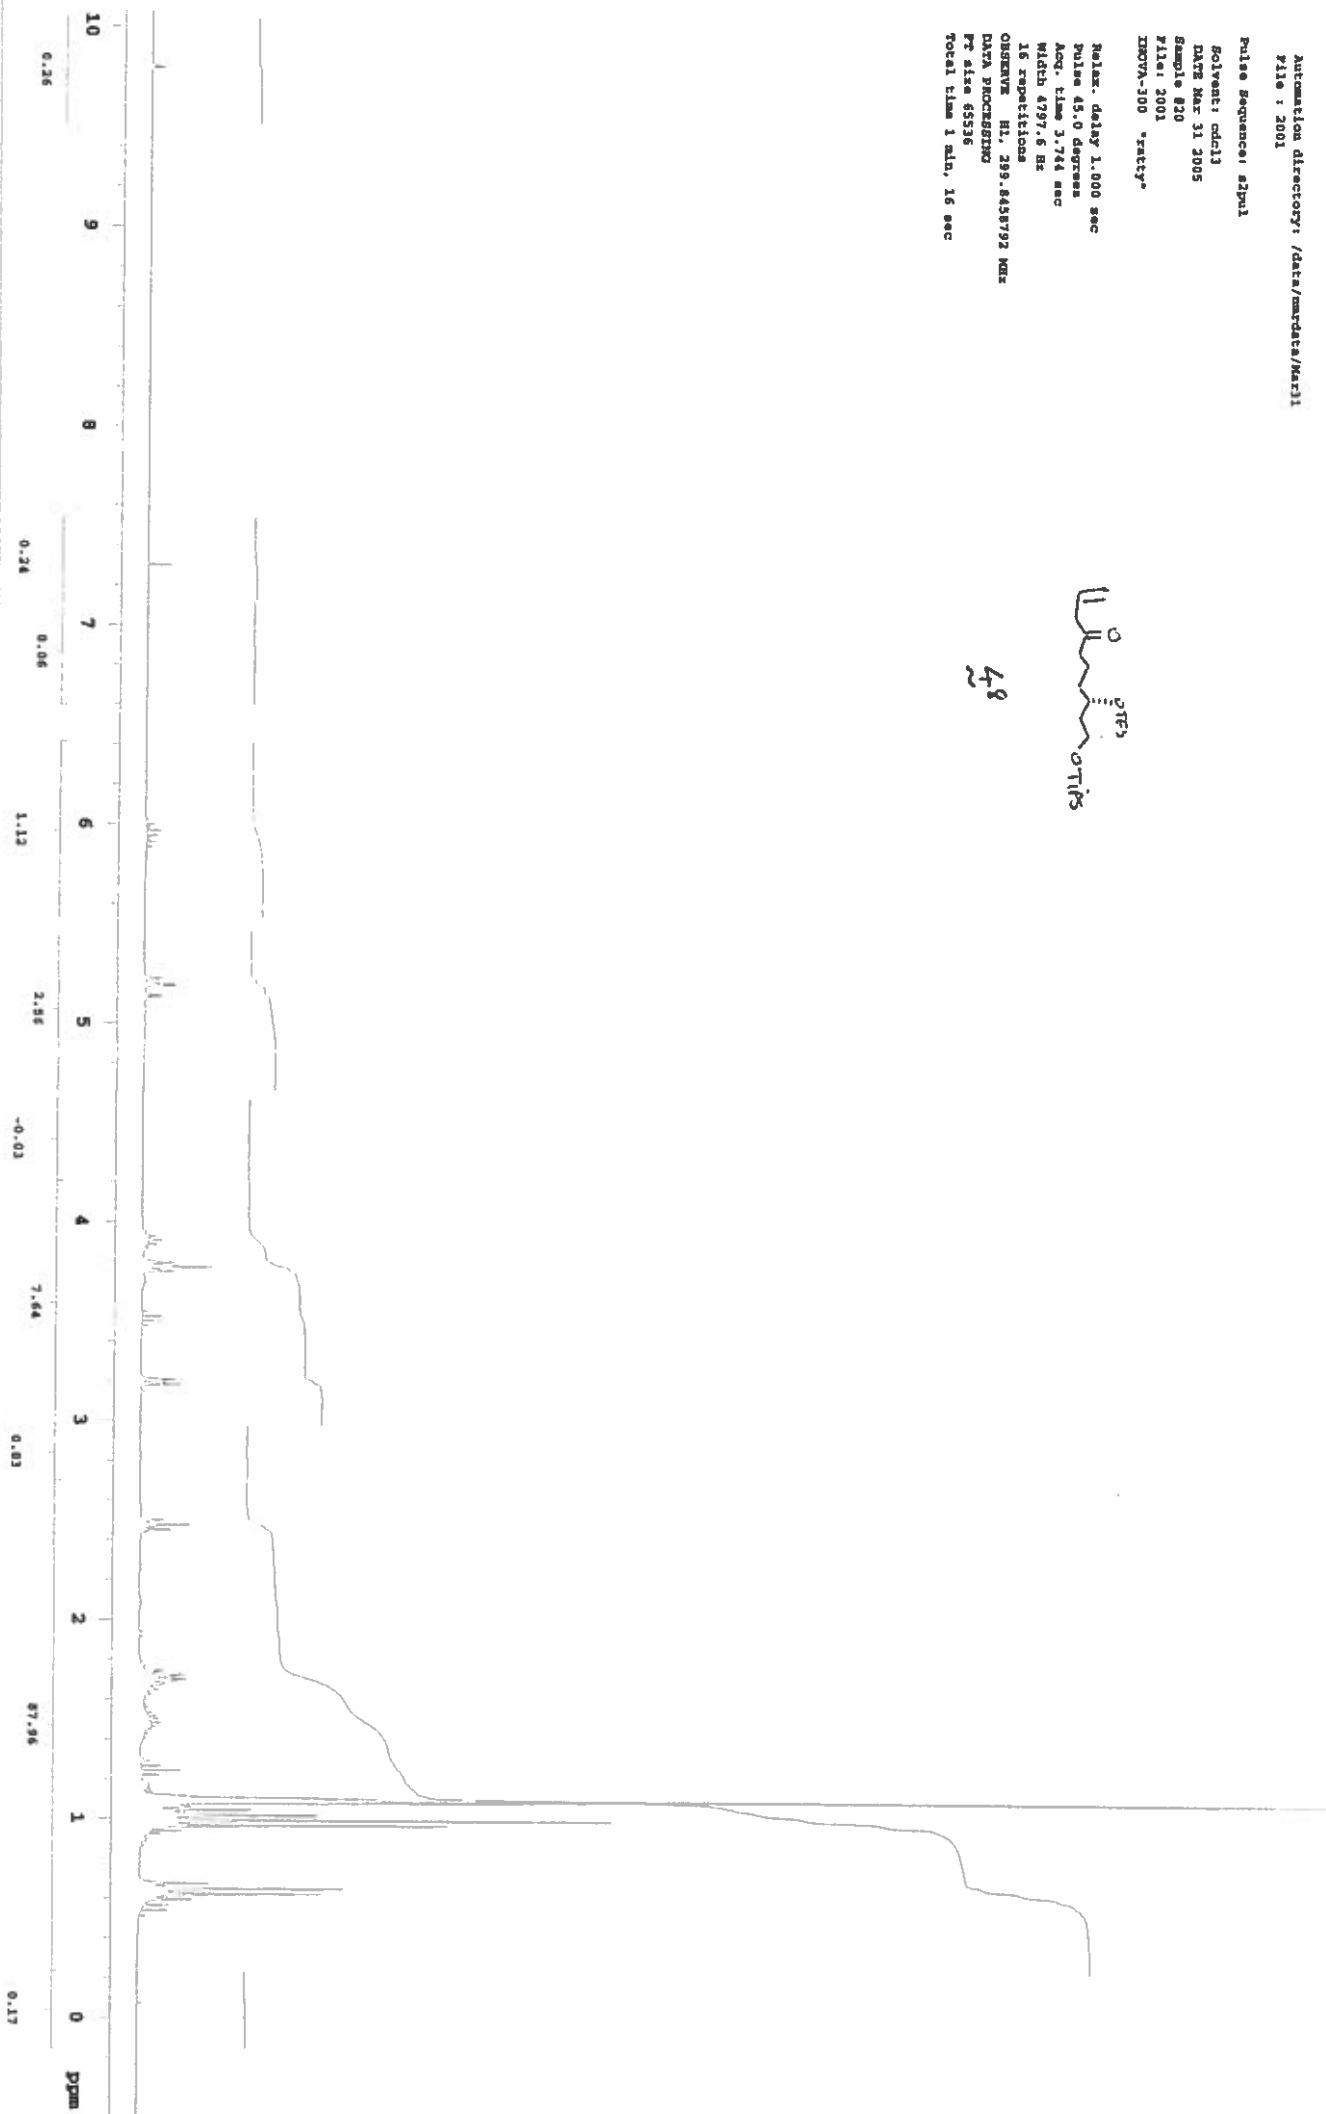



Automation directory: /data/martdata/Jul125  
File : 1402

```
Pulse Sequence: szpul
Solvent: cdcl3
DATE Jul 25 2005
Sample #14
File: 1402
INVOA-300  "athos"
```

```

Pulse delay 1.000 sec
Pulse 45.0 degrees
Acq. time 1.82 sec
Width 10050.1 Hz
128 repetitions
OBSERVE C13, 75.3062003 MHz
DECOUPLE H1, 259.8473786 MHz
Power 37 dB
continguously on
MAGNET-15 modulated
DATA PROCESSING
k1m bandwidth 1.0 Hz
yr also 131072
Total time 12 min, 2 sec

```

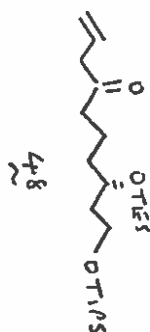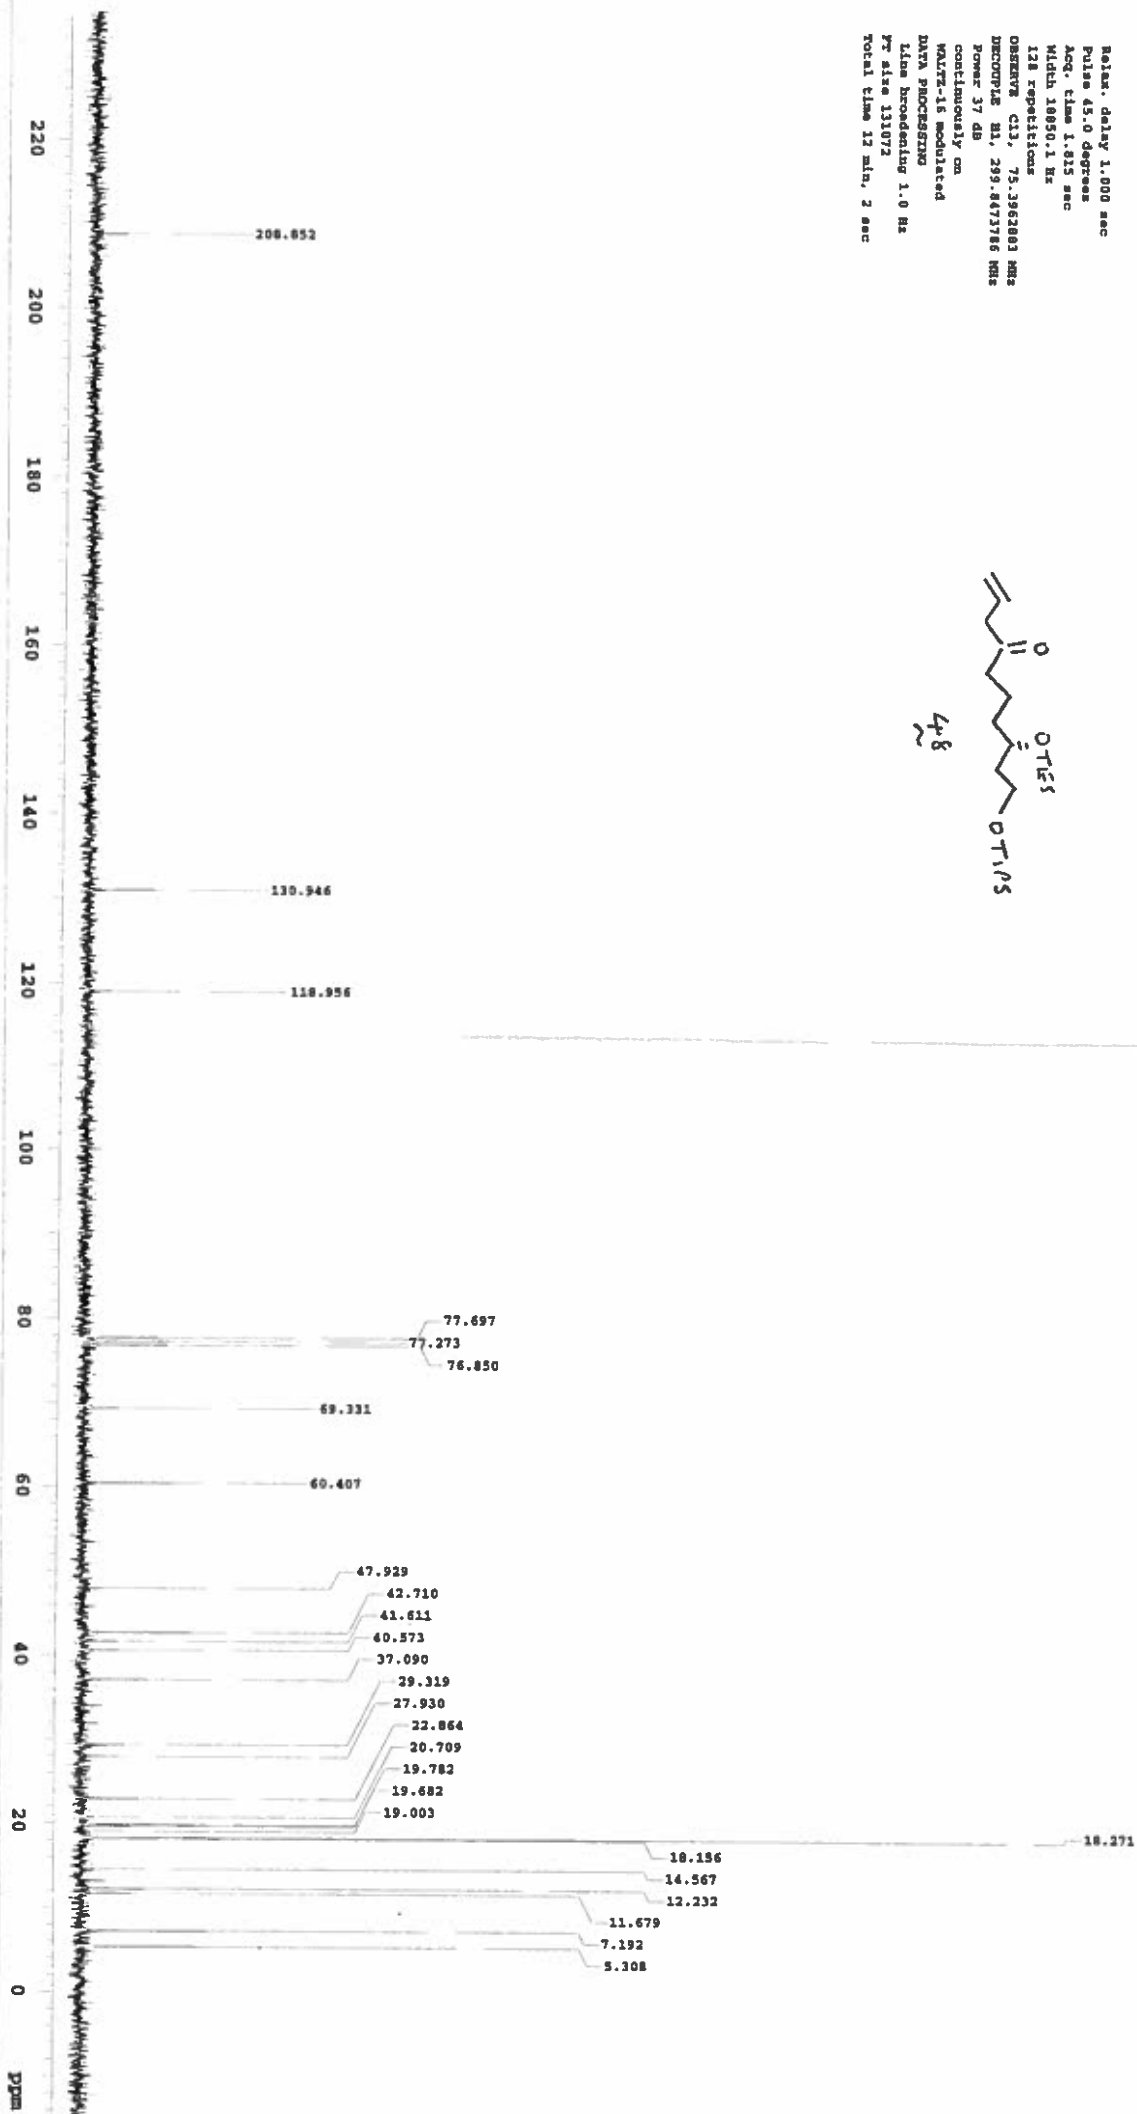

Automation directory: /data/umdata/Apr05  
File: 2401

Pulse sequence: zgpg30

Solvent: CDCl<sub>3</sub>

DATE: Apr 5 2005

Sample #24

File: 2401

INSTRUMENT: spect

Pulse delay: 1.000 sec

Pulse: 45.0 degrees

Acq. time: 3.744 sec

Width: 4797.6 Hz

16 repetitions

NAME: 06-06

DATA PROCESSING

FT size: 65536

Total time: 1 min, 16 sec

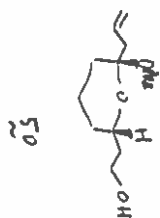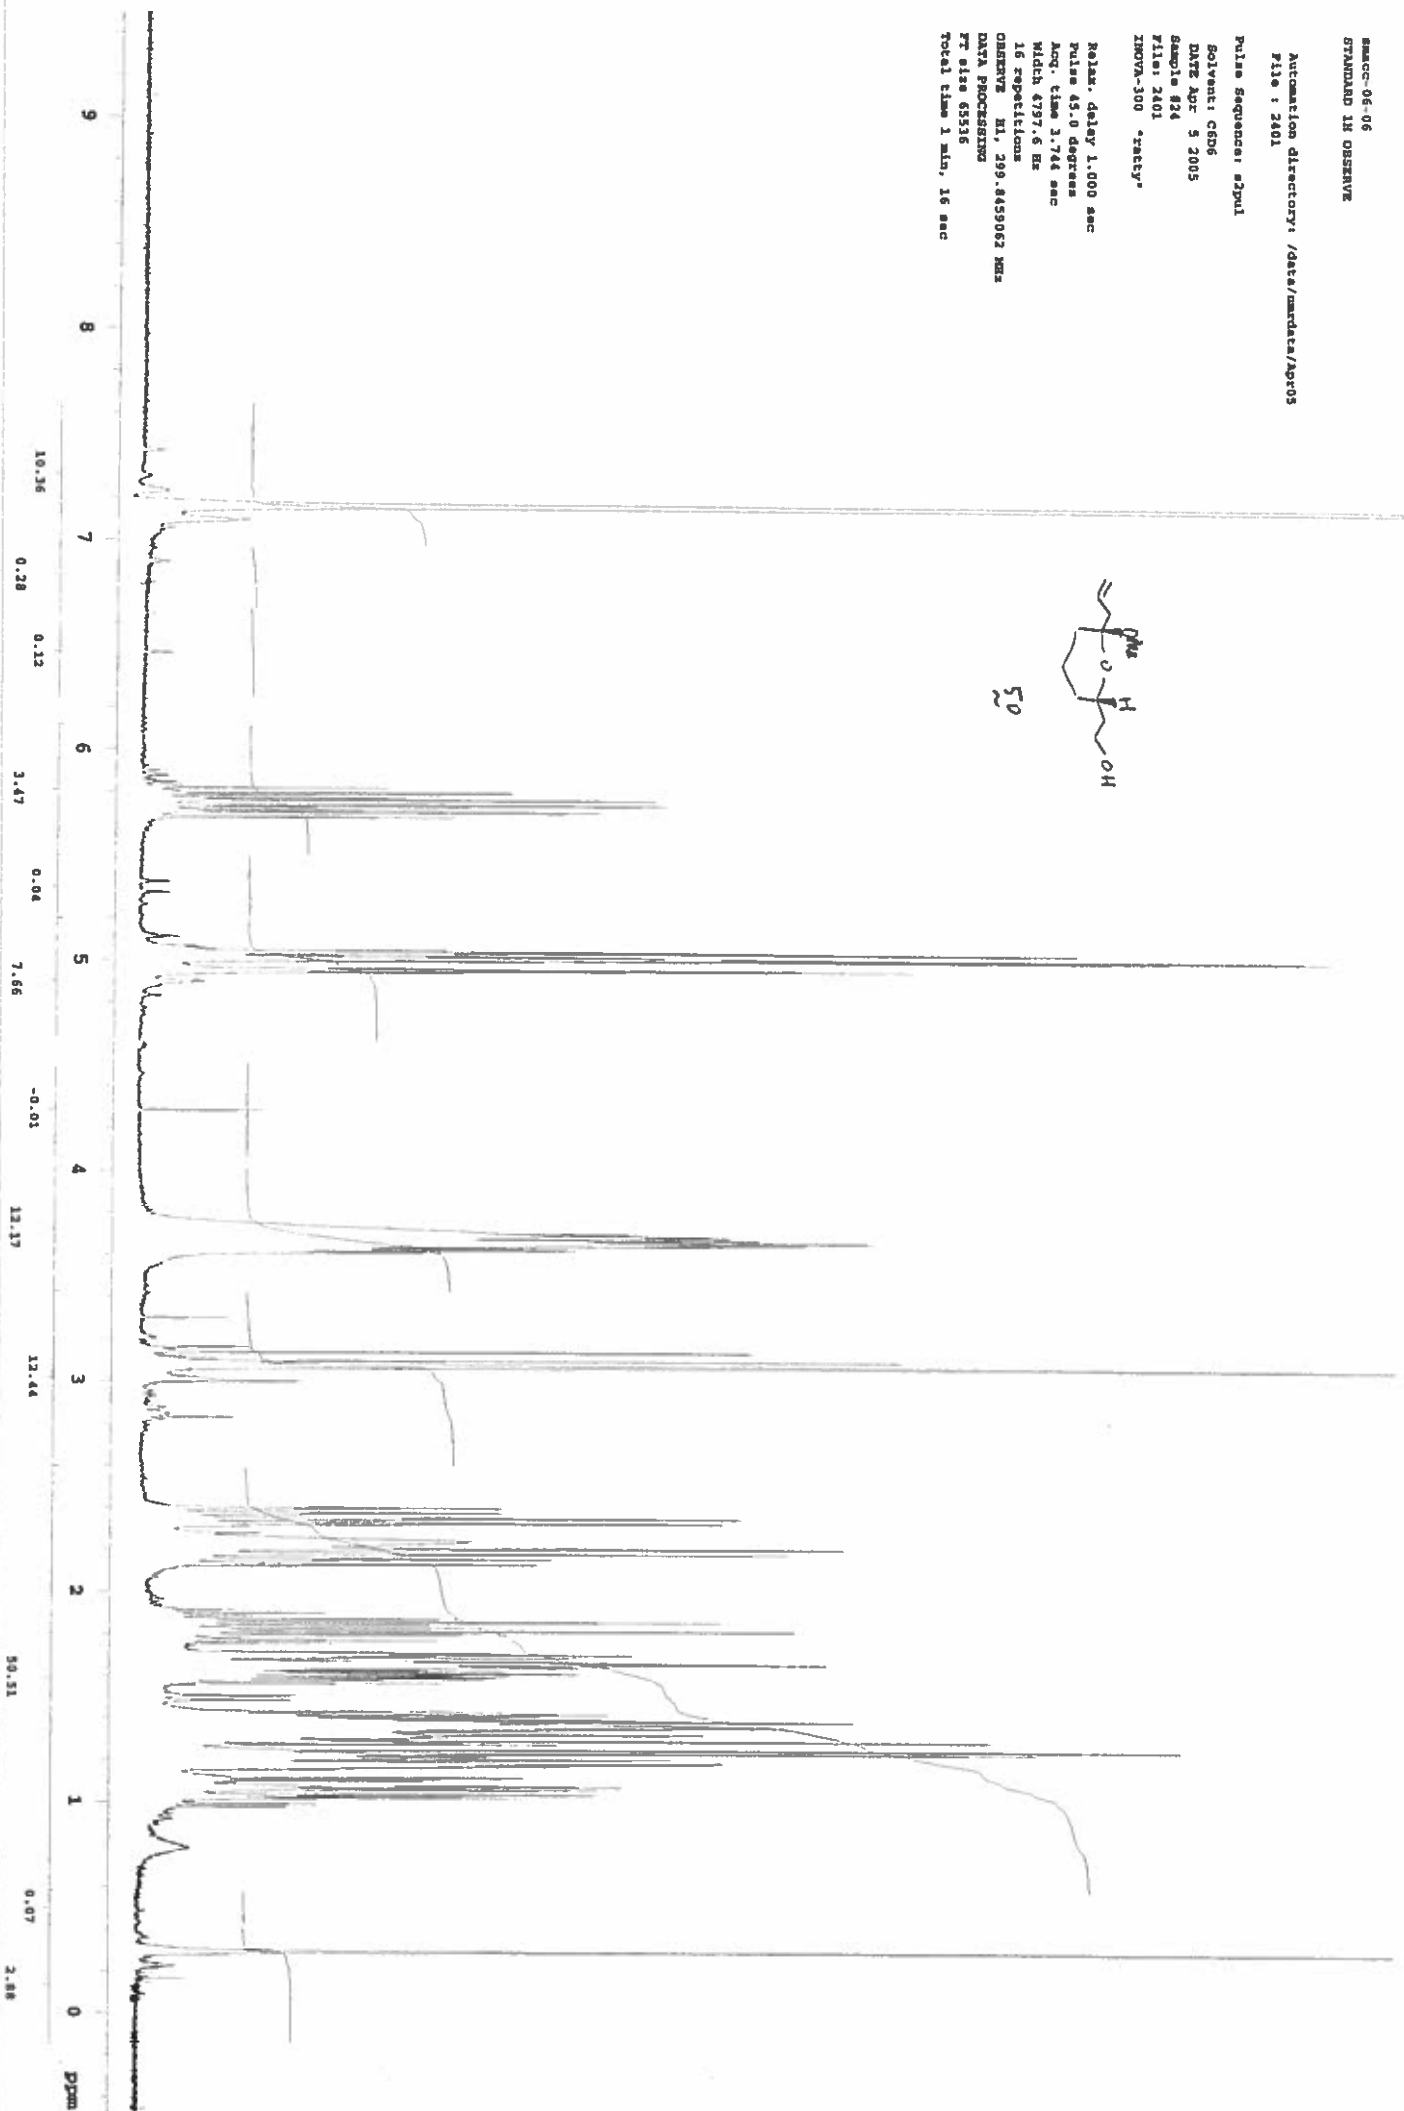

Automation directory: /data/mwdata/NO25  
File: 2402

Pulse Sequence: zgpg30

Solvent: CDCl<sub>3</sub>

DATE Acq: 5 2005

Sample: 824

P1: 2402

INSTR: spect

Relax. delay: 1.000 sec

Pulse: 45.0 degrees

Acq. time: 1.815 sec

Width: 18850.1 Hz

256 repetitions

Observer: C.L.

PROBHD: 5mm 1H/13C QNP 100

Power: 37 dB

continuously on

DATA PROCESSING

Line broadening: 1.0 Hz

FT size: 131072

Total time: 12 min, 2 sec

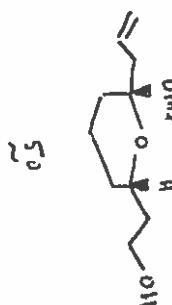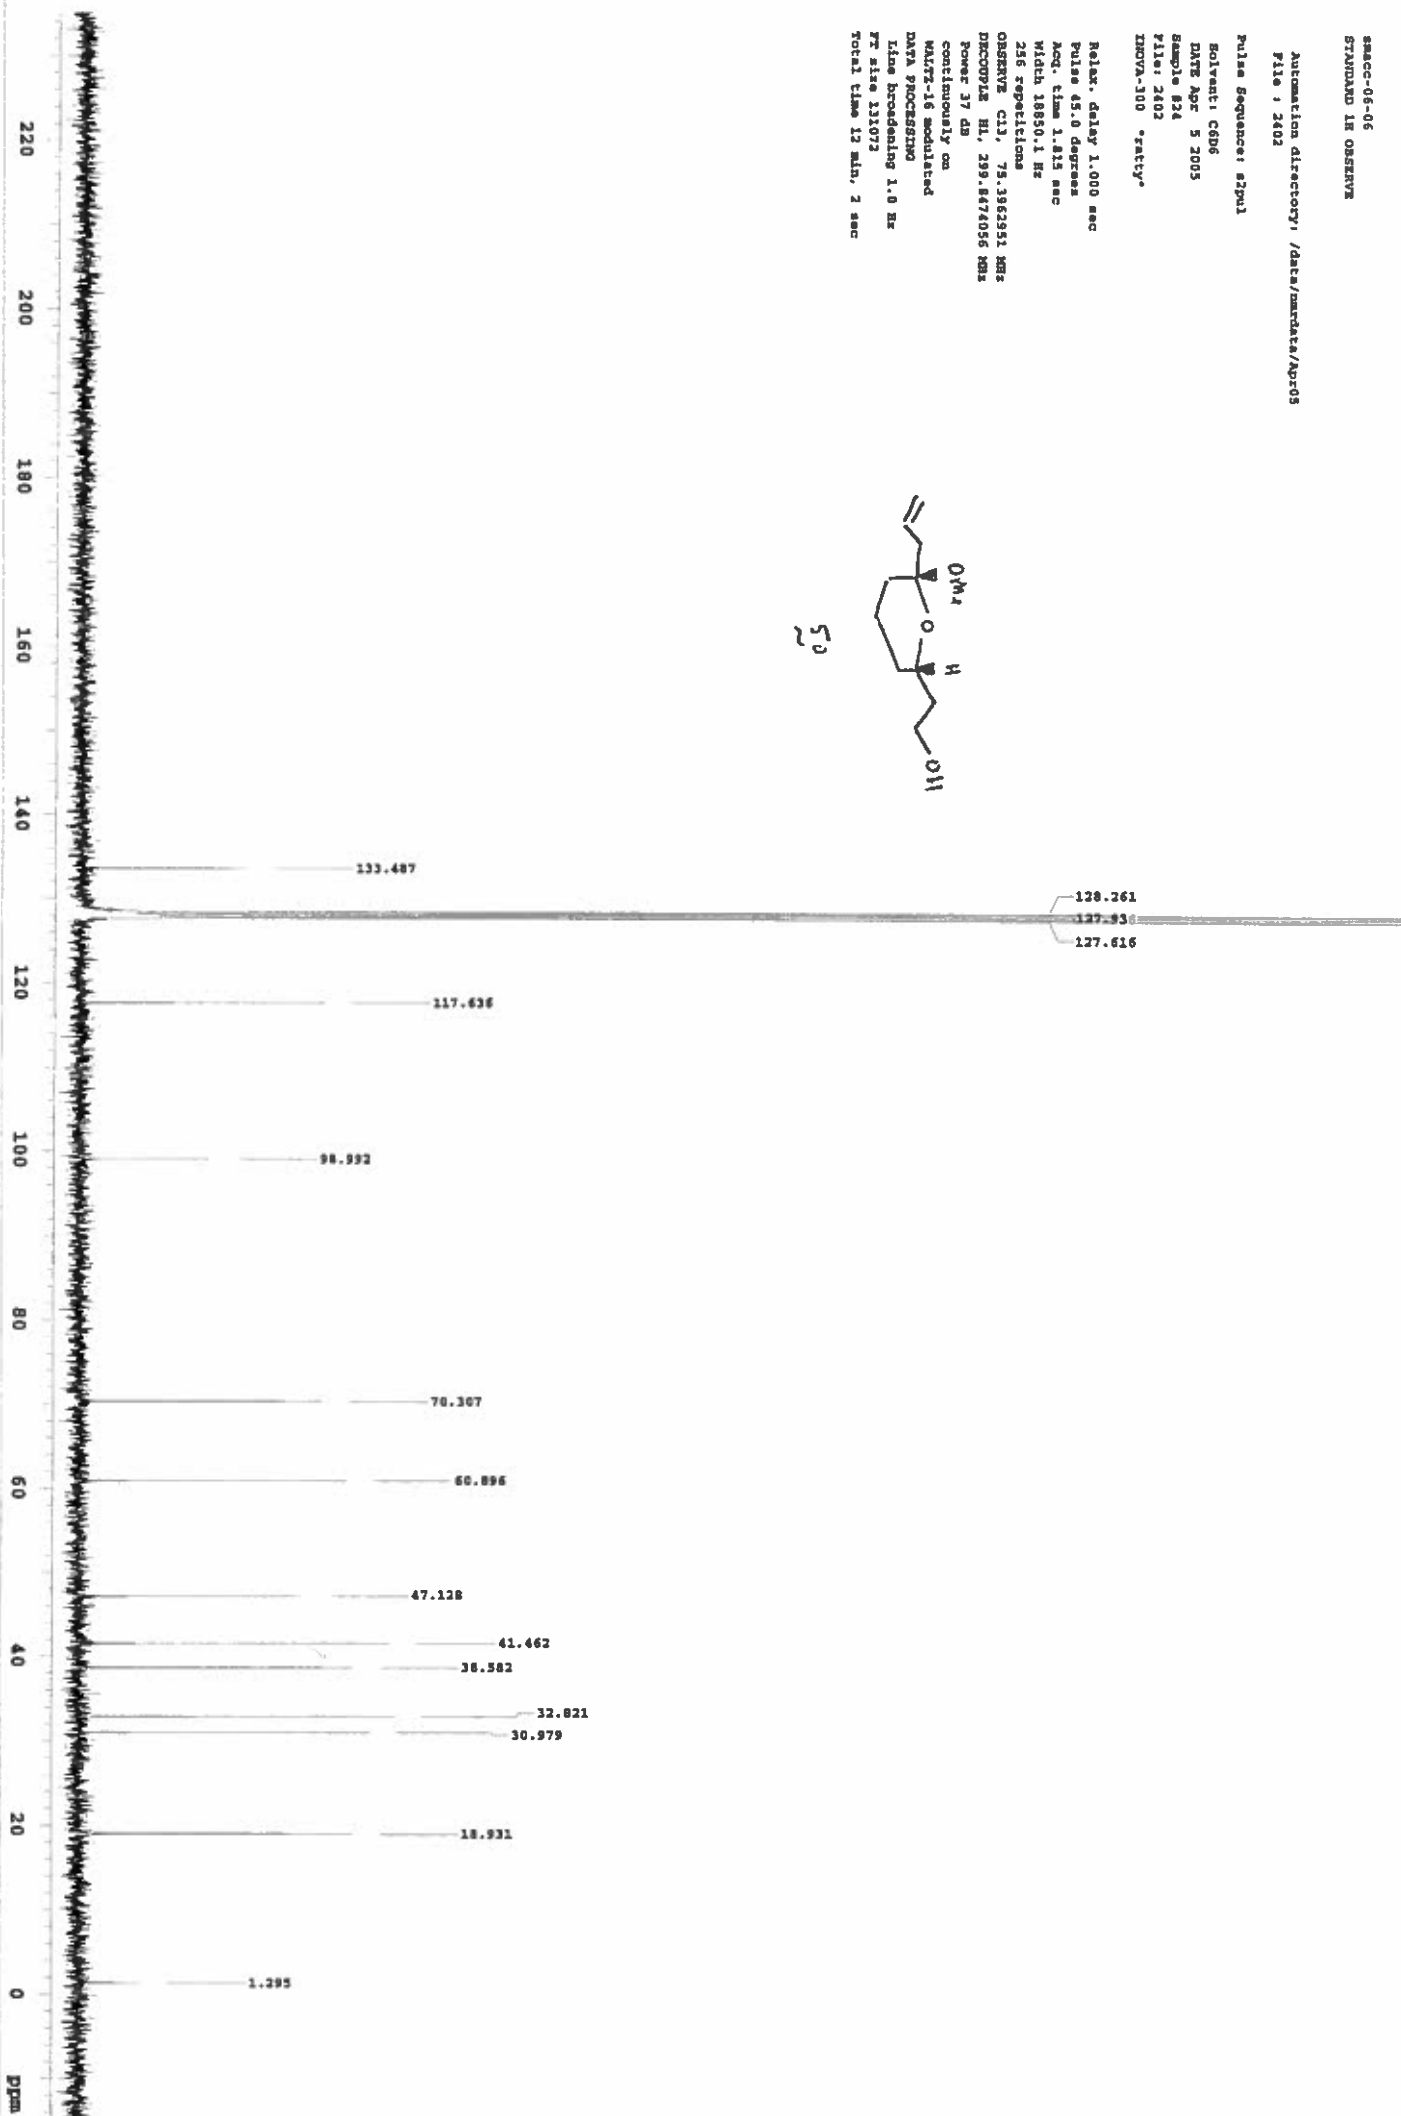

model: IX  
STANDARD 1H OBSERVE

Automation directory: /data/nowdata/0118  
File: 0901

Pulse sequence: zgpg30

Solvent: C6D6

DATE: Jul 18 2005

Sample: 89

File: 0901

INNOVA-300 "athos"

Relax. delay: 1.000 sec

Pulse: 45.0 degrees

Acq. time: 3.744 sec

Width: 4797.6 Hz

16 repetitions

OBSERVE: H1, 299.8459062 MHz

DATA PROCESSING

FT size: 65536

Total time: 1 min, 16 sec

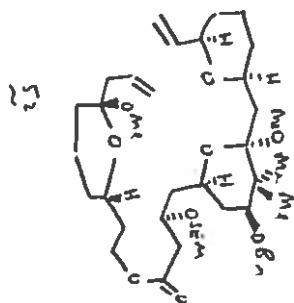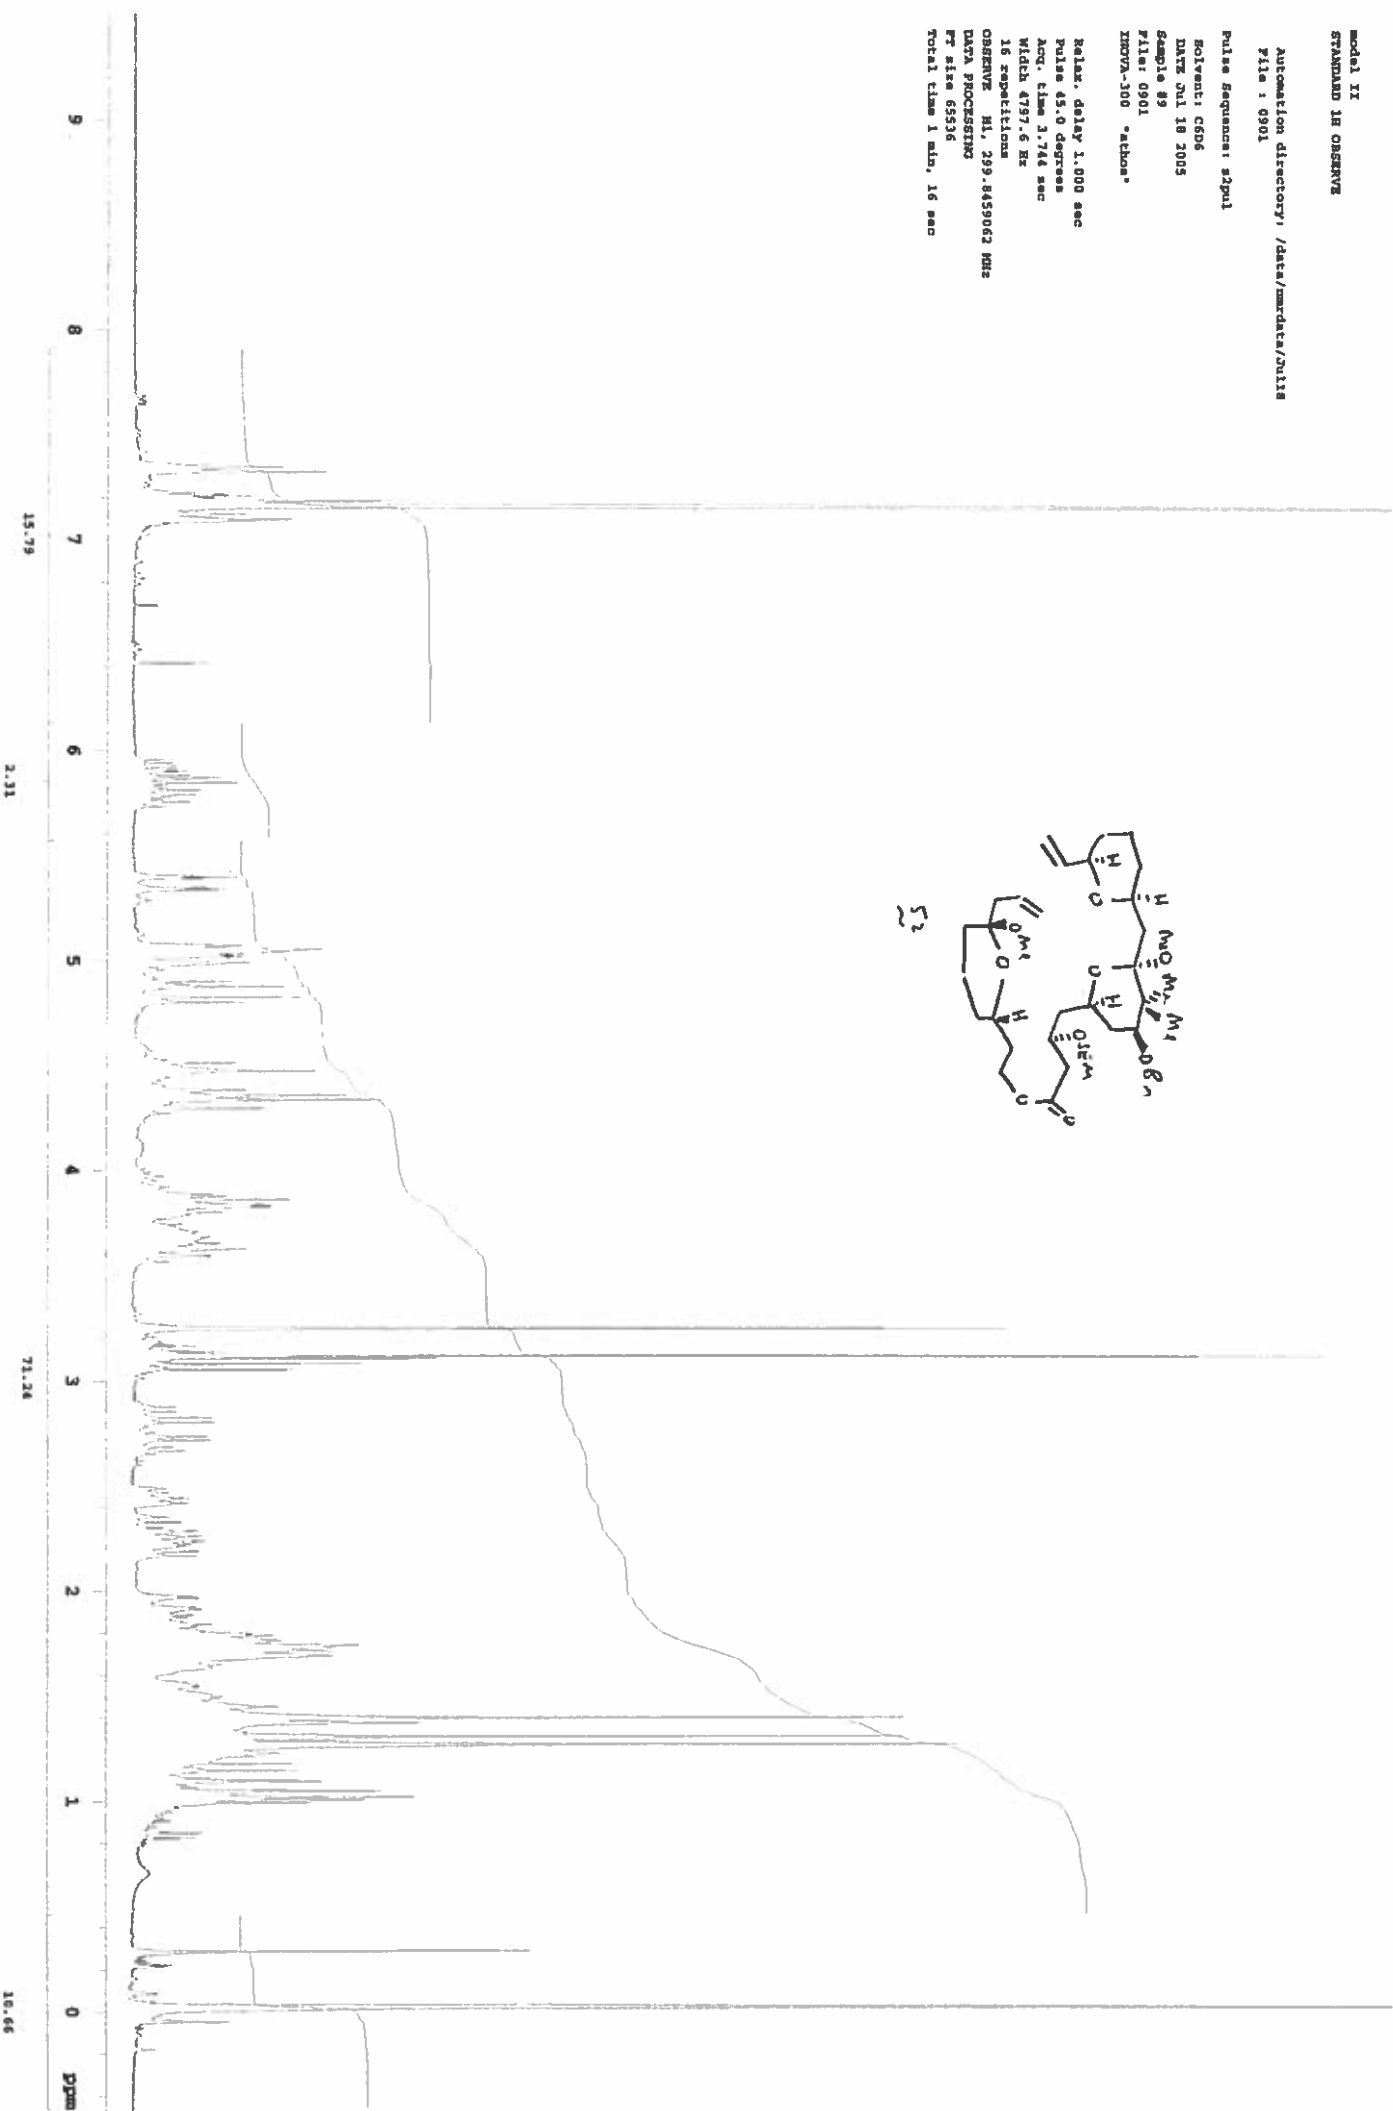

PRECURSOR  
STANDARD IN OBSERVE

Automation directory: /data/standard/Aug04  
File: 2902

Pulse Sequence: zgpg30

Solvent: CDCl<sub>3</sub>

DATE Aug 4 2005

Sample #29

File: 2902

INSTRUMENT: spect

Relax. delay 1.000 sec

Pulse 45.0 degrees

Acq. time 1.815 sec

Width 18850.1 Hz

256 repetitions

OBSERVE C13, 75.3963951 MHz

DECOUPLE H1, 299.6474056 MHz

Power 37 dB

continuously on

DATA PROCESSING

Line broadening 1.0 Hz

FT size 131072

Total time 13 min, 2 sec

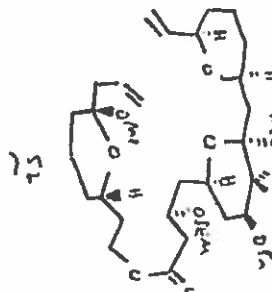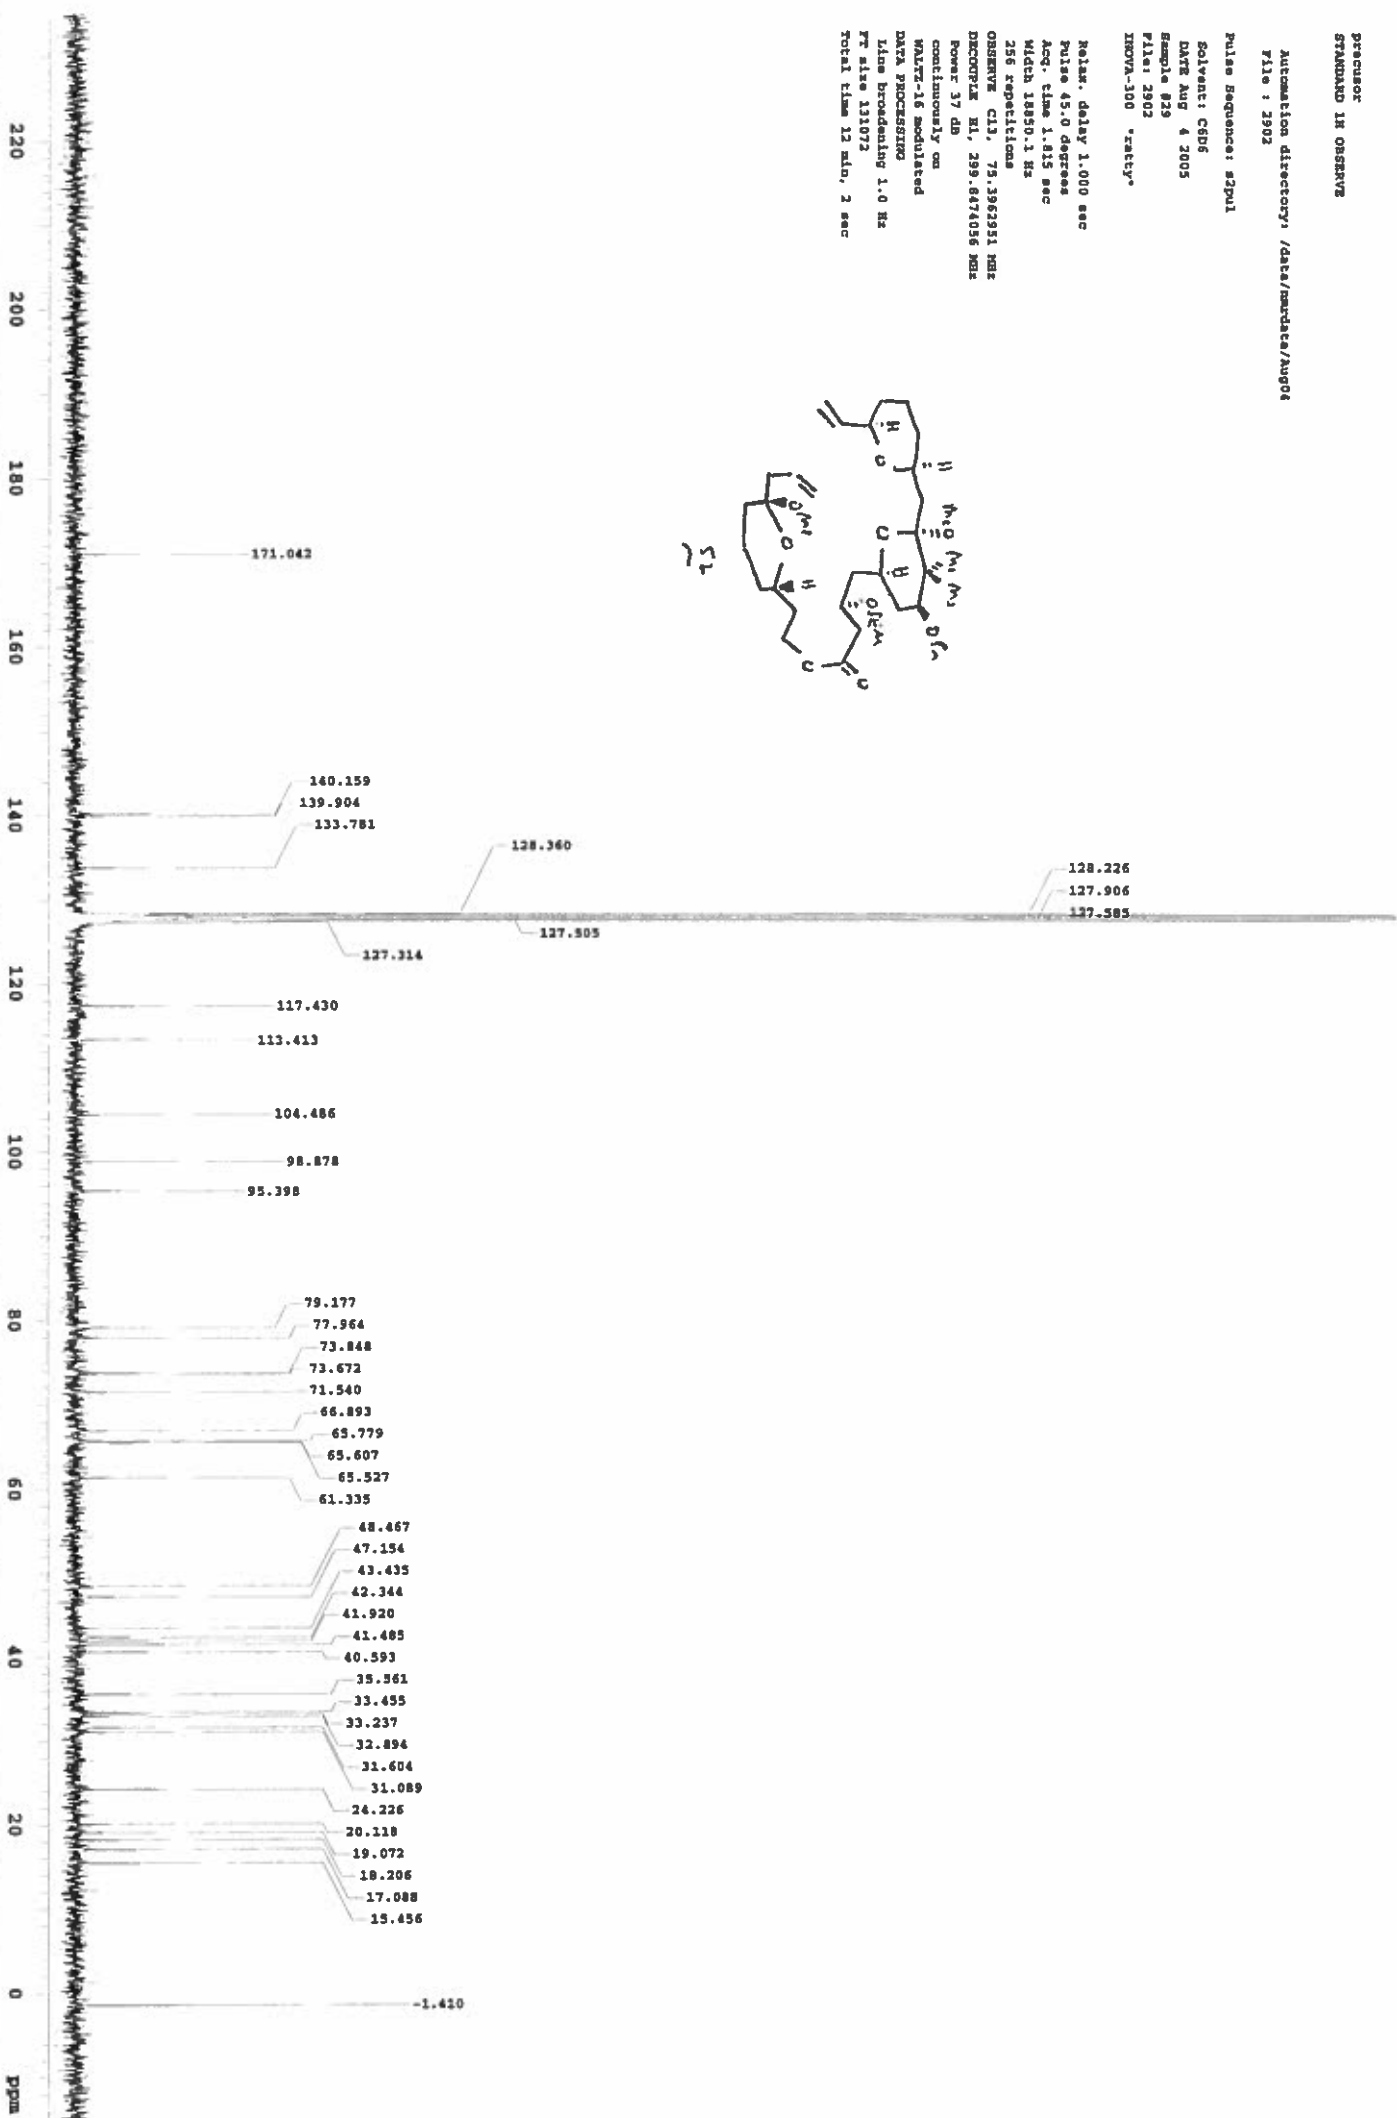

metachase b fi  
STANDARD IN OBSERVE

Automation directory: /data/metadata/00119  
File : 2901

Pulse sequence: zgpg30

Solvent: CDCl<sub>3</sub>

DATE: Jul 19 2005

Sample #29

File: 2901

INOVA-300 "cdcl<sub>3</sub>"

Relax. delay 1.000 sec

Pulse 45.0 degrees

Acq. time 3.744 sec

Width 4797.6 Hz

128 repetitions

OBSERVE H1, 299.8459062 MHz

DATA PROCESSING

FT size 65536

Total time 10 min, 8 sec

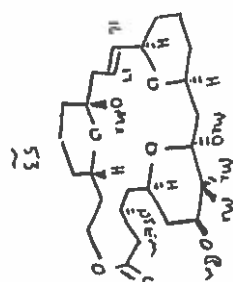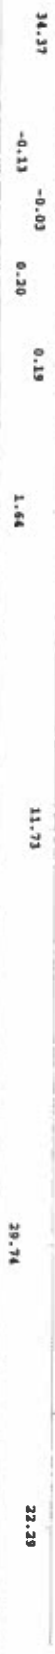

Automation directory: /data/mwdata/AUG09  
File: 4902

Pulse Sequence: szpul

Solvent: C6D6  
DATE Aug 9 2005  
Sample 849  
File: 4902  
INVOA-100 "ratty"

Pulse delay 1.000 sec  
Pulse 45.0 degrees  
Acq. time 1.815 sec  
Width 18850.1 Hz  
2048 repetitions  
OBSERVE C13, 75.3962951 MHz  
DECOUPLE H1, 299.8474056 MHz  
Power 37 dB  
continuously on  
WALTZ-16 modulated  
DATA PROCESSING  
Line broadening 1.0 Hz  
FT size 131072  
Total time 1 hr, 36 min, 33 sec

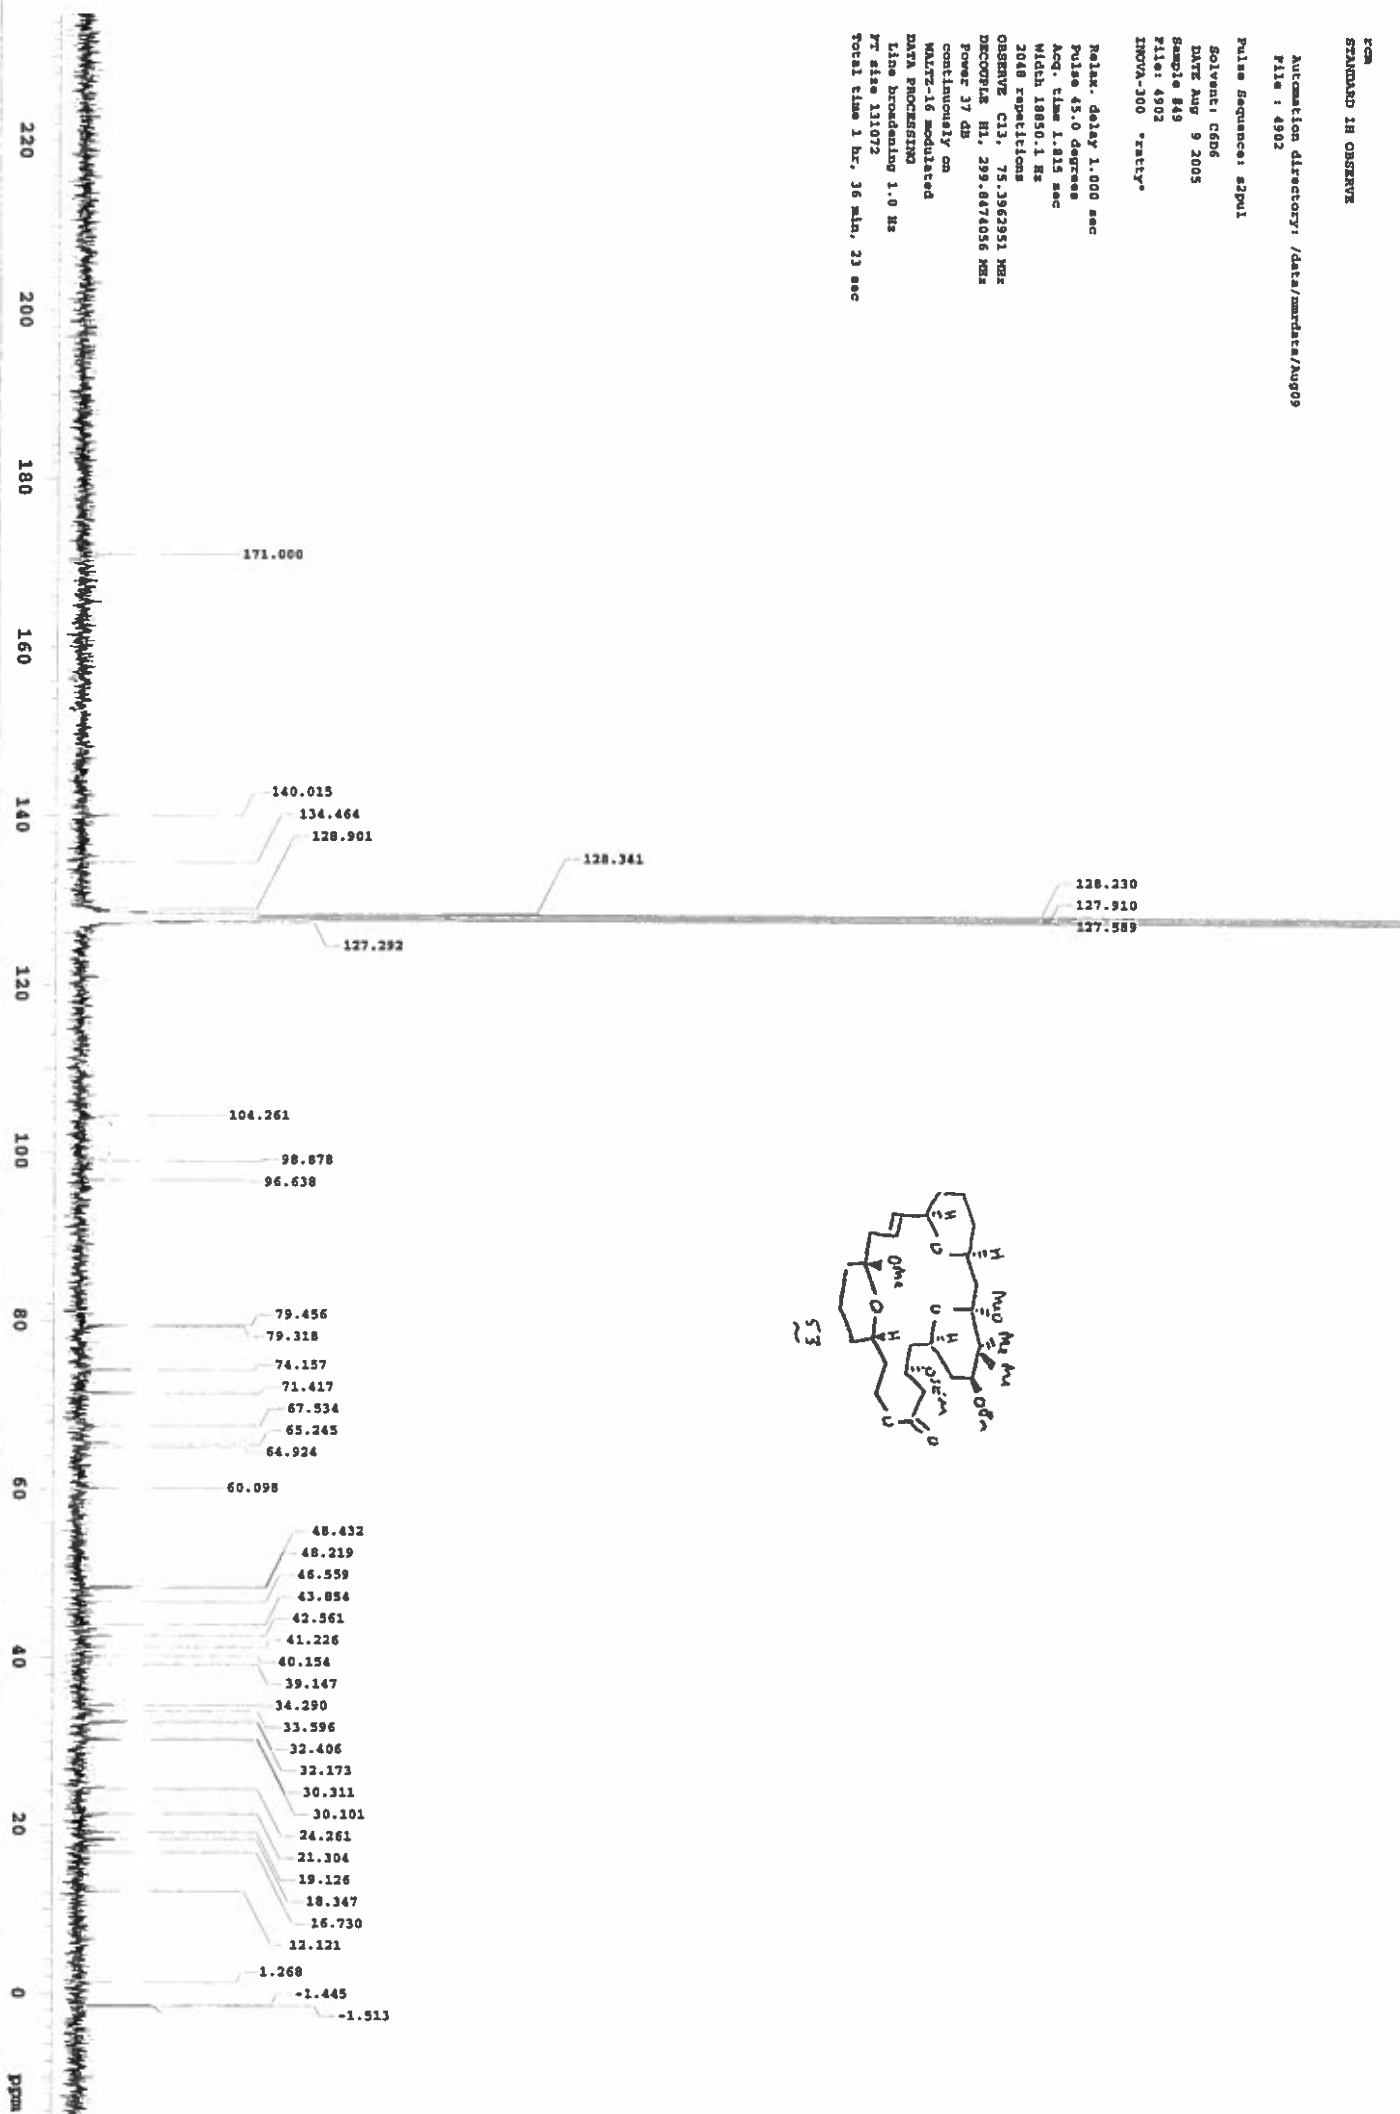

Automation directory: /data/nmrdata/2111  
File: 2202

Pulse sequence: zgpg30  
Solvent: CDCl3  
Date: Jul 11 2005  
Sample: 822  
File: 2202  
INOVA-300 "exity"

Relax. delay 1.000 sec  
Pulse 45.0 degrees  
Acq. time 1.615 sec  
Width 18850.1 Hz  
256 repetitions  
OBSERVE CH3, 75.362951 MHz  
DECOUPLE H1, 299.6174056 MHz  
Power 37 dB  
continuously on  
WALTZ-16 modulated  
line broadening 1.0 Hz  
PT aise 131072  
Total time 13 min, 2 sec

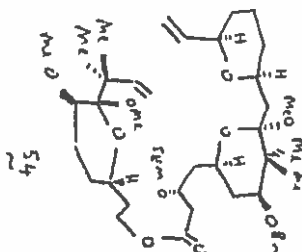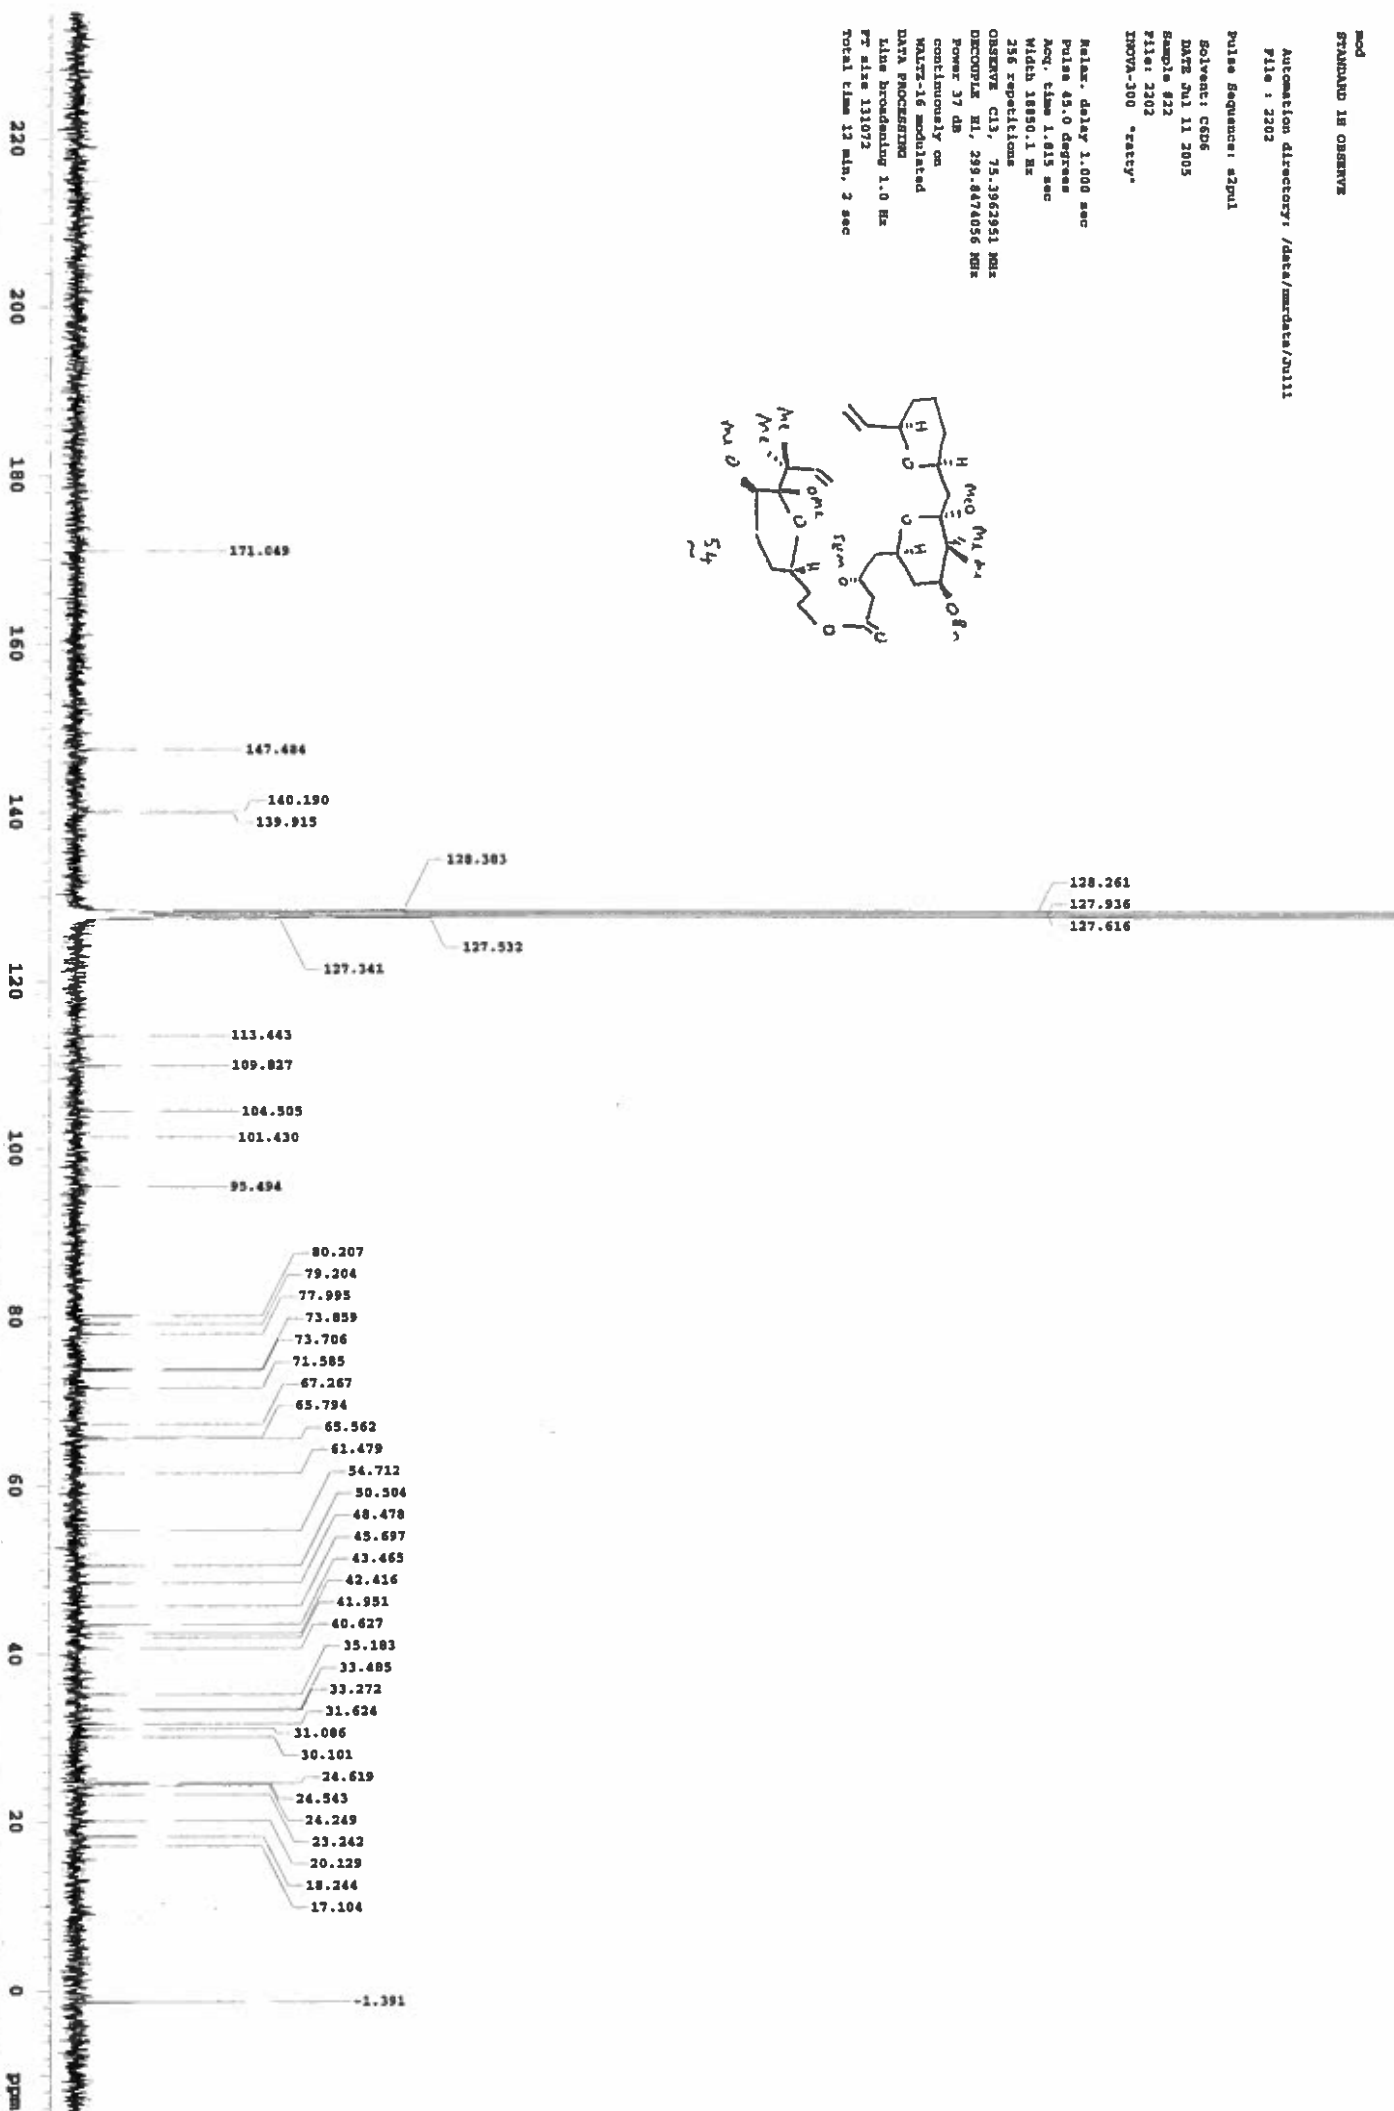

Supplement: c7ob00079k1.pdf [file c7ob00079k1.pdf]
